# Supplementary material for: Selective Catalytic Frustrated Lewis Pair Hydrogenation of CO2 in the Presence of Silylhalides
Source: PubMed Central journal article supplement (PMC9298004; doi:10.1002/anie.202112233), 2021-11-03
Supplement: ANIE-60-25771-s001.pdf [file ANIE-60-25771-s001.pdf]

Supporting Information

**Selective Catalytic Frustrated Lewis Pair Hydrogenation of CO<sub>2</sub> in the Presence of Silylhalides**

*Tongtong Wang<sup>+</sup>, Maotong Xu<sup>+</sup>, Andrew R. Jupp, Zheng-Wang Qu,<sup>\*</sup> Stefan Grimme, and Douglas W. Stephan<sup>\*</sup>*

anie\_202112233\_sm\_miscellaneous\_information.pdf

## Contents

|                                                                                                                                                                 |    |
|-----------------------------------------------------------------------------------------------------------------------------------------------------------------|----|
| 1. General Considerations .....                                                                                                                                 | 2  |
| 2. Stoichiometric reaction between [Lut-H][HCO <sub>2</sub> B(C <sub>6</sub> F <sub>5</sub> ) <sub>3</sub> ] and Et <sub>3</sub> Si-I .....                     | 2  |
| 3. Stoichiometric reaction between [Lut-H][I] and B(C <sub>6</sub> F <sub>5</sub> ) <sub>3</sub> .....                                                          | 4  |
| 4. Attempts to reduce Et <sub>3</sub> Si-I to Et <sub>3</sub> Si-H by B(C <sub>6</sub> F <sub>5</sub> ) <sub>3</sub> /2,6-Lutidine FLP and H <sub>2</sub> ..... | 6  |
| 5. B(C <sub>6</sub> F <sub>5</sub> ) <sub>3</sub> /2,6-Lutidine FLP and halosilanes with H <sub>2</sub> /CO <sub>2</sub> .....                                  | 6  |
| General Procedure .....                                                                                                                                         | 7  |
| Entry 1: B(C <sub>6</sub> F <sub>5</sub> ) <sub>3</sub> /2,6-Lutidine/Me <sub>3</sub> Si-Cl in C <sub>6</sub> D <sub>6</sub> .....                              | 7  |
| Entry 2: B(C <sub>6</sub> F <sub>5</sub> ) <sub>3</sub> /2,6-Lutidine/Me <sub>3</sub> Si-Cl in CDCl <sub>3</sub> .....                                          | 8  |
| Entry 3: B(C <sub>6</sub> F <sub>5</sub> ) <sub>3</sub> /2,6-Lutidine/Me <sub>3</sub> Si-Br in C <sub>6</sub> D <sub>6</sub> .....                              | 9  |
| Entry 4: B(C <sub>6</sub> F <sub>5</sub> ) <sub>3</sub> /2,6-Lutidine/Me <sub>3</sub> Si-Br in CDCl <sub>3</sub> .....                                          | 11 |
| Entry 5: B(C <sub>6</sub> F <sub>5</sub> ) <sub>3</sub> /2,6-Lutidine/Me <sub>3</sub> Si-I in C <sub>6</sub> D <sub>6</sub> .....                               | 13 |
| Entry 6: B(C <sub>6</sub> F <sub>5</sub> ) <sub>3</sub> /2,6-Lutidine/Me <sub>3</sub> Si-I in CDCl <sub>3</sub> .....                                           | 16 |
| Entry 7: B(C <sub>6</sub> F <sub>5</sub> ) <sub>3</sub> /2,6-Lutidine/Et <sub>3</sub> Si-I in C <sub>6</sub> D <sub>6</sub> .....                               | 20 |
| Entry 8: B(C <sub>6</sub> F <sub>5</sub> ) <sub>3</sub> /2,6-Lutidine/Et <sub>3</sub> Si-I in CDCl <sub>3</sub> .....                                           | 21 |
| 6. B(C <sub>6</sub> F <sub>5</sub> ) <sub>3</sub> /2,4,6-Collidine FLP and halosilanes with H <sub>2</sub> /CO <sub>2</sub> .....                               | 23 |
| Entry 9: B(C <sub>6</sub> F <sub>5</sub> ) <sub>3</sub> /2,4,6-Collidine/Et <sub>3</sub> Si-I in C <sub>6</sub> D <sub>6</sub> .....                            | 24 |
| Entry 10: B(C <sub>6</sub> F <sub>5</sub> ) <sub>3</sub> /2,4,6-Collidine/Et <sub>3</sub> Si-I in CDCl <sub>3</sub> .....                                       | 25 |
| 7. B(C <sub>6</sub> F <sub>5</sub> ) <sub>3</sub> /2,6-Lutidine FLP and halosilanes with D <sub>2</sub> /CO <sub>2</sub> .....                                  | 27 |
| Reaction for 24 hours .....                                                                                                                                     | 27 |
| Reaction for 70 hours .....                                                                                                                                     | 30 |
| 8. Experimental References .....                                                                                                                                | 32 |
| 9. DFT computational Details: .....                                                                                                                             | 34 |
| Computational References .....                                                                                                                                  | 63 |

## 1. General Considerations

Unless otherwise specified, all manipulations were performed under an inert atmosphere of dry, oxygen-free  $N_2$  using Schlenk techniques or glovebox. 4 Å molecular sieves was purchased from Sigma Aldrich, activated by heating at 300°C under vacuum for 2 days. Solvents were dried by a Grubbs type Innovative Technologies solvent purification system, degassed on Schlenk line and stored over activated 4 Å molecular sieves prior to use.  $CDCl_3$  was dried over calcium hydride, distilled and stored in activated 4 Å molecular sieves prior to use.  $C_6D_6$  was degassed on Schlenk line and stored in activated 4 Å molecular sieves prior to use. All glassware was dried in a 180 °C oven overnight prior to use.  $B(C_6F_5)_3$  was first purified by sublimation at 110°C under vacuum, the sublimed  $B(C_6F_5)_3$  was dissolved in minimum amount of pentane at room temperature. Storing at a -25°C freezer afforded pure  $B(C_6F_5)_3$  as white crystalline solids. Carbon  $^{13}C$  dioxide (99 atom %  $^{13}C$ , <3 atom %  $^{18}O$ ) were purchased from Sigma Aldrich.  $[Lut-H][HCO_2B(C_6F_5)_3]$  was synthesized according to literature method.<sup>[1]</sup> NMR spectra were obtained at room temperature on Bruker Advance III 400 MHz, Bruker Ultrashield 400 MHz, Agilent DD2 500 MHz and Agilent DD2 600 MHz spectrometer. NMR chemical shifts are reported in ppm. Multiplicity is reported as follows: s = singlet, d = doublet, t = triplet, m = multiplet, b = broad.

## 2. Stoichiometric reaction between $[Lut-H][HCO_2B(C_6F_5)_3]$ and $Et_3Si-I$

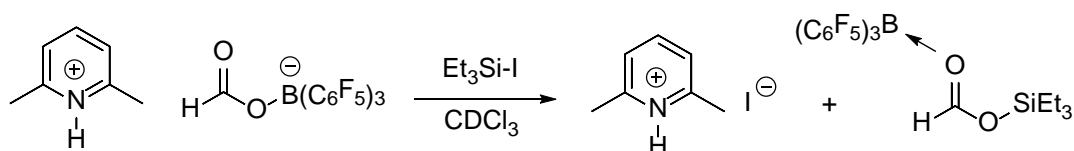

$[Lut-H][HCO_2B(C_6F_5)_3]$ <sup>[1]</sup> (113 mg, 0.17 mmol) and  $Et_3Si-I$  (30  $\mu$ L, 0.17 mmol) were mixed in 0.5 mL  $CDCl_3$ . The reaction was completed within 10 minutes at room temperature, afforded 2,6-lutidinium iodide  $[Lut-H][I]$  and  $Et_3SiOCHO \cdot B(C_6F_5)_3$  adduct, which has NMR data agreed with the literature values.<sup>[2]</sup>

$[Lut-H][HCO_2B(C_6F_5)_3]$ :  $^1H$  NMR (400 MHz,  $CDCl_3$ )  $\delta$  8.31 (s, 1H), 8.18 (t,  $J$  = 7.9 Hz, 1H), 7.49 (d,  $J$  = 7.9 Hz, 2H), 2.72 (s, 6H);  $^{11}B\{^1H\}$  NMR (128 MHz,  $CDCl_3$ )  $\delta$  -2.62;  $^{19}F\{^1H\}$  NMR (377 MHz,  $CDCl_3$ )  $\delta$  -134.59 (dd,  $J$  = 23.9, 8.4 Hz), -158.96 (t,  $J$  = 20.3 Hz), -164.90 (ddd,  $J$  = 23.6, 19.2, 8.5 Hz).

$[Lut-H][I]$  and  $Et_3SiOCHO \cdot B(C_6F_5)_3$ :  $^1H$  NMR (400 MHz,  $CDCl_3$ ) 8.22 (t,  $J$  = 8.0 Hz, 1H), 8.17 (s, 1H), 7.53 (d,  $J$  = 7.9 Hz, 2H), 2.98 (s, 6H), 1.12 – 0.73 (m, 15H, Et);  $^{11}B\{^1H\}$  NMR (128 MHz,  $CDCl_3$ )  $\delta$  -0.11;  $^{19}F$  NMR (377 MHz,  $CDCl_3$ )  $\delta$  -133.89 (d,  $J$  = 22.4 Hz), -158.13 (t,  $J$  = 20.3 Hz), -164.78 (m).

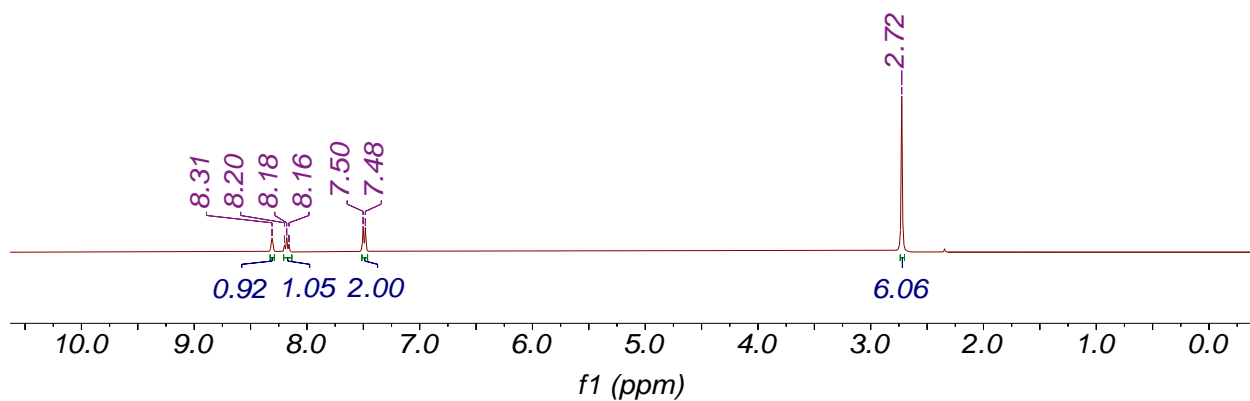

Figure S 1.  $^1\text{H}$  NMR spectrum of  $[\text{Lut-H}][\text{HCO}_2\text{B}(\text{C}_6\text{F}_5)_3]$ ,  $\text{CDCl}_3$

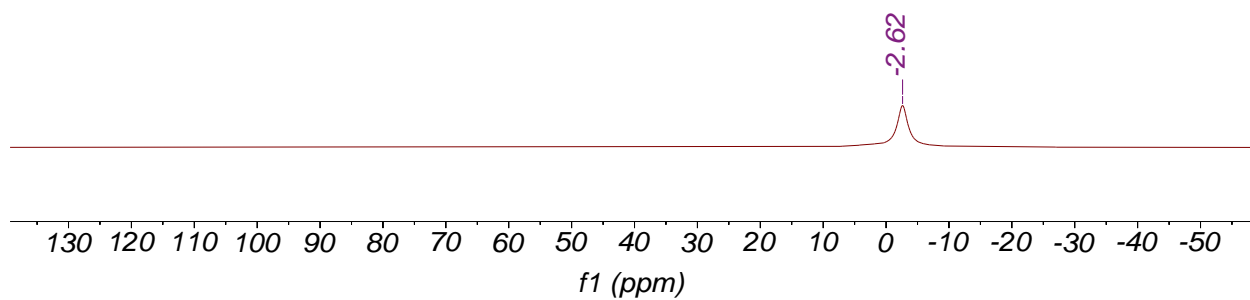

Figure S 2.  $^{11}\text{B}\{^1\text{H}\}$  NMR spectrum of  $[\text{Lut-H}][\text{HCO}_2\text{B}(\text{C}_6\text{F}_5)_3]$ ,  $\text{CDCl}_3$

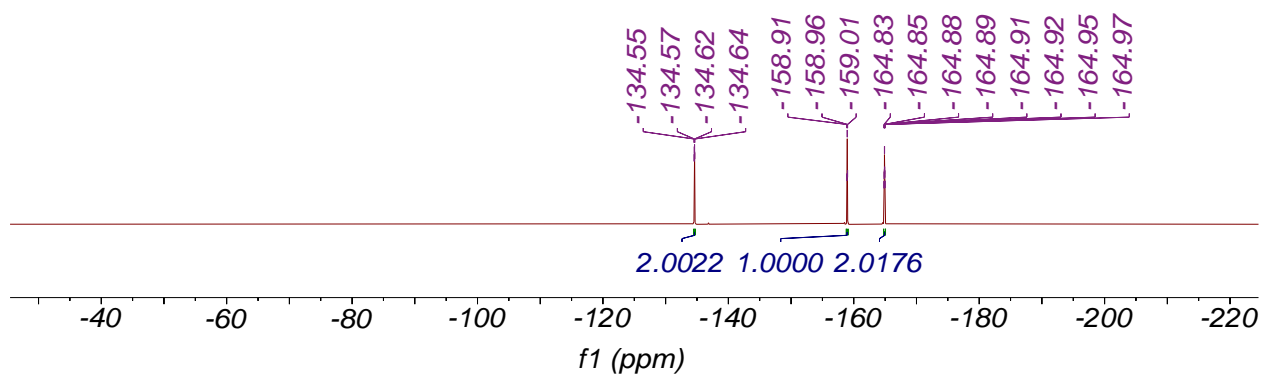

Figure S 3.  $^{19}\text{F}\{^1\text{H}\}$  NMR spectrum of  $[\text{Lut-H}][\text{HCO}_2\text{B}(\text{C}_6\text{F}_5)_3]$ ,  $\text{CDCl}_3$

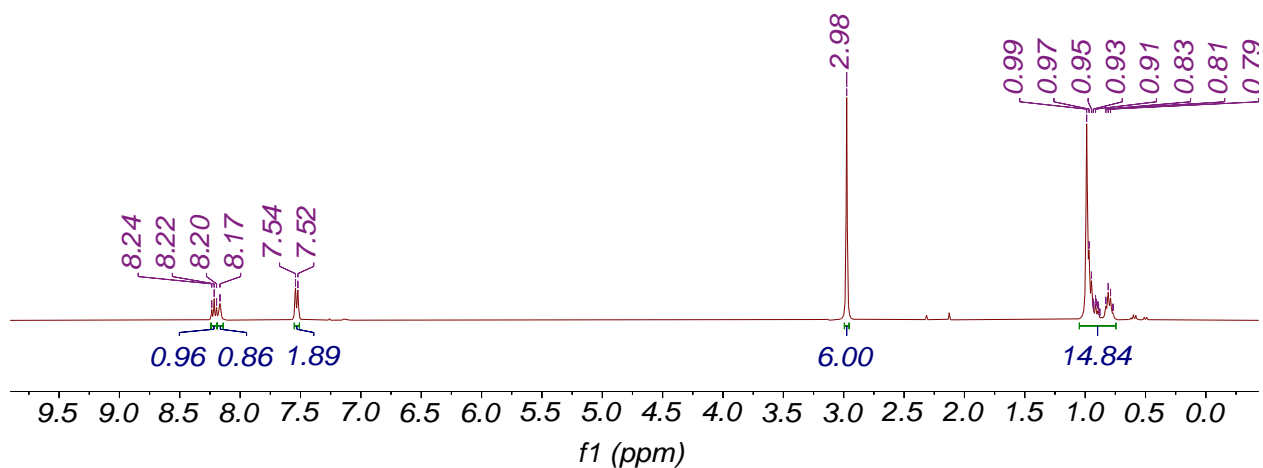

Figure S 4.  $^1\text{H}$  NMR spectrum of  $[\text{Lut-H}][\text{I}]$  and  $\text{Et}_3\text{SiOCHO}\cdot\text{B}(\text{C}_6\text{F}_5)_3$ ,  $\text{CDCl}_3$

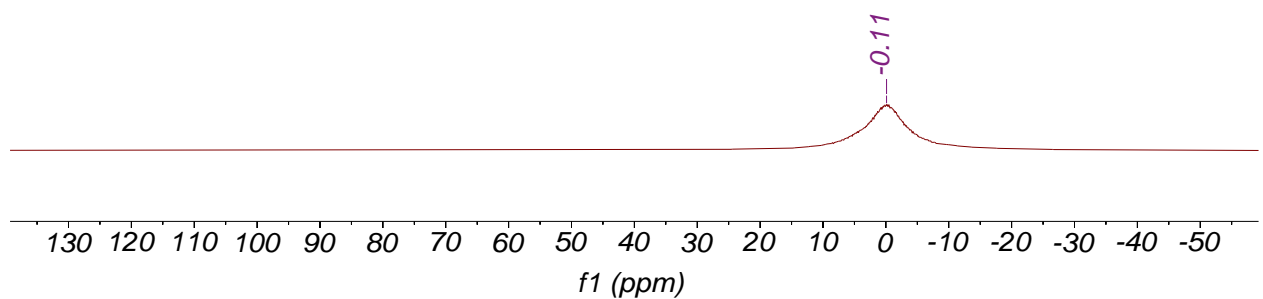

Figure S 5.  $^{11}\text{B}\{^1\text{H}\}$  NMR spectrum of  $[\text{Lut-H}][\text{I}]$  and  $\text{Et}_3\text{SiOCHO}\cdot\text{B}(\text{C}_6\text{F}_5)_3$ ,  $\text{CDCl}_3$

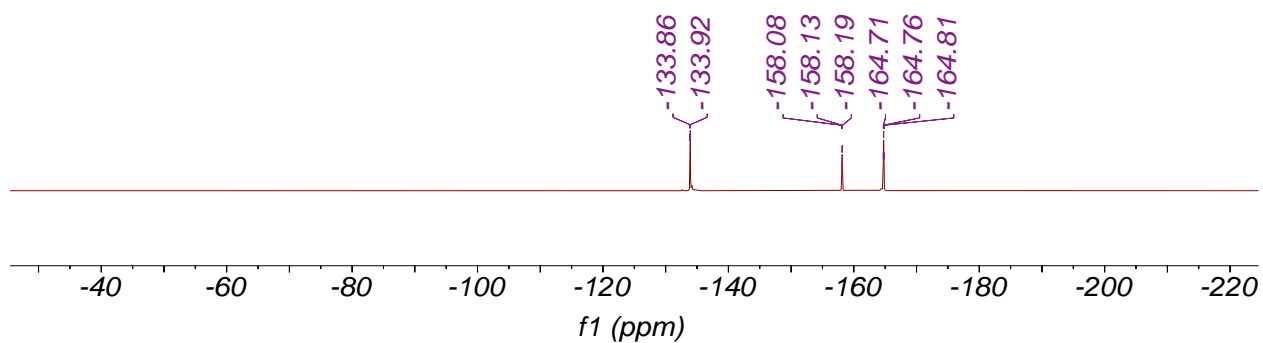

Figure S 6.  $^{19}\text{F}\{^1\text{H}\}$  NMR spectrum of  $[\text{Lut-H}][\text{I}]$  and  $\text{Et}_3\text{SiOCHO}\cdot\text{B}(\text{C}_6\text{F}_5)_3$ ,  $\text{CDCl}_3$

### 3. Stoichiometric reaction between $[\text{Lut-H}][\text{I}]$ and $\text{B}(\text{C}_6\text{F}_5)_3$

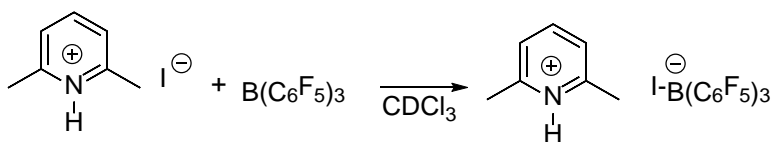

[Lut-H][I] (2.3 mg, 0.01 mmol) and  $B(C_6F_5)_3$  (5.0 mg, 0.01 mmol) were mixed in 0.5 mL  $CDCl_3$ . The reaction was completed within 10 minutes at room temperature, afforded the corresponding adduct [Lut-H][ $I \cdot B(C_6F_5)_3$ ].

$^1H$  NMR (400 MHz,  $CDCl_3$ )  $\delta$  15.16 (t,  $J = 56.5$  Hz, 1H), 8.20 (t,  $J = 7.9$  Hz, 1H), 7.51 (d,  $J = 8.0$  Hz, 2H), 3.04 (s, 6H);  $^{11}B\{^1H\}$  NMR (128 MHz,  $CDCl_3$ )  $\delta$  43.33;  $^{19}F\{^1H\}$  NMR (377 MHz,  $CDCl_3$ )  $\delta$  -127.87 (bs), -146.13 (bs), -161.11 (bs).

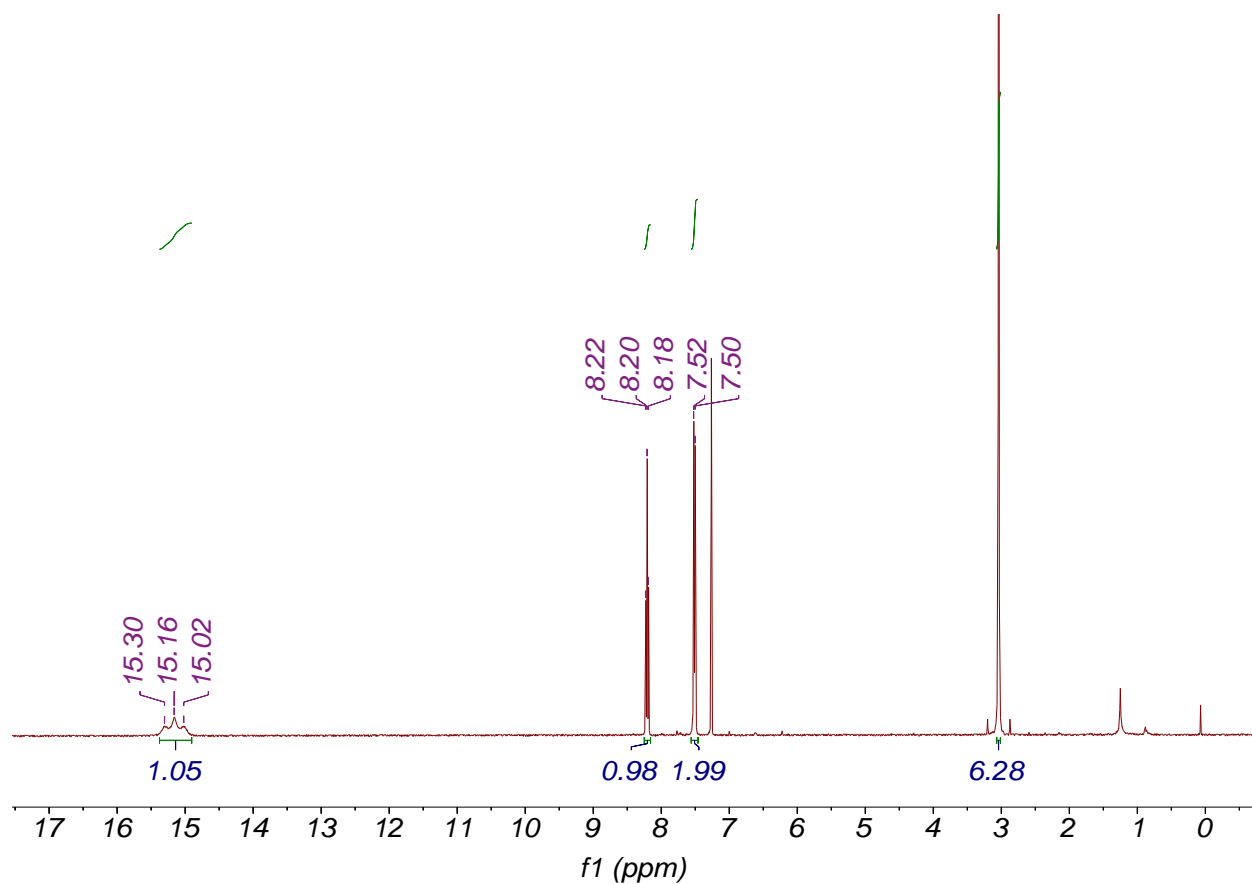

Figure S 7.  $^1H$  NMR spectrum of [Lut-H][ $I \cdot B(C_6F_5)_3$ ],  $CDCl_3$

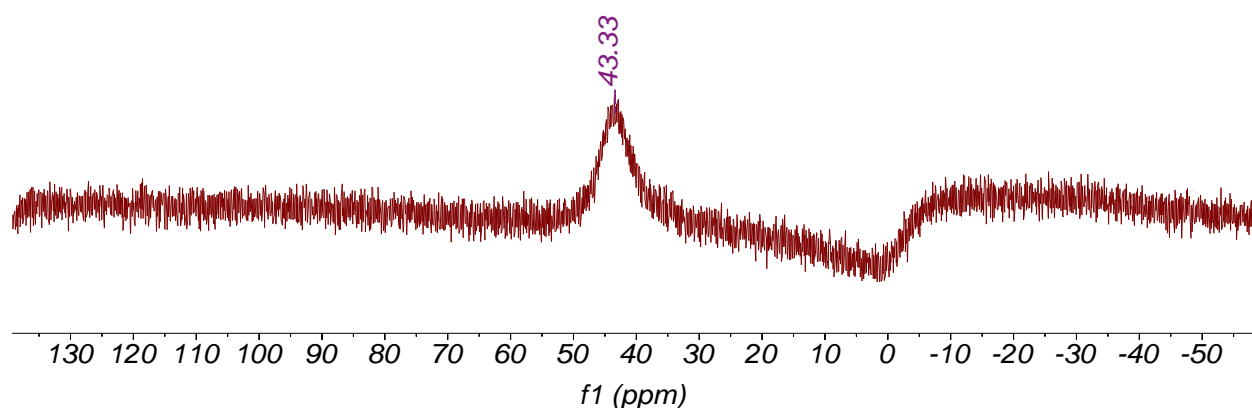

Figure S 8.  $^{11}\text{B}\{^1\text{H}\}$  NMR spectrum of  $[\text{Lut-H}][\text{I}\cdot\text{B}(\text{C}_6\text{F}_5)_3]$ ,  $\text{CDCl}_3$

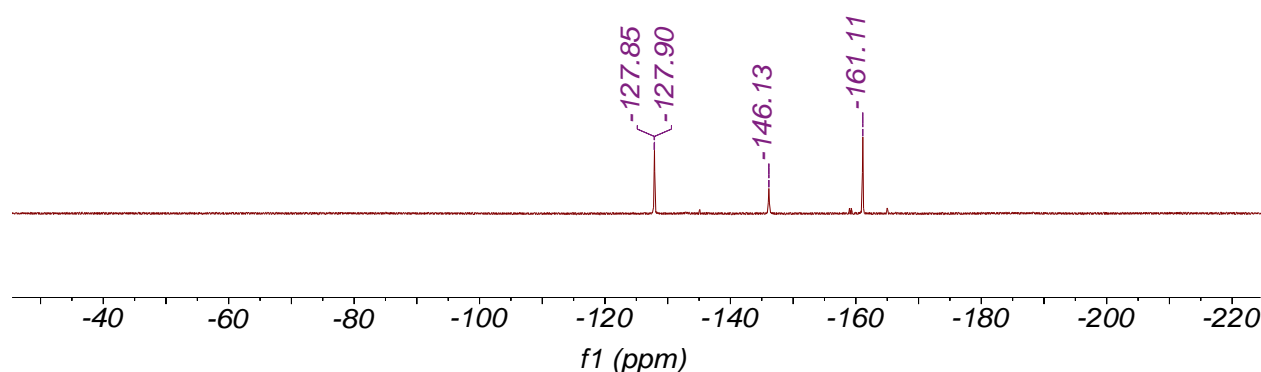

Figure S 9.  $^{19}\text{F}\{^1\text{H}\}$  NMR spectrum of  $[\text{Lut-H}][\text{I}\cdot\text{B}(\text{C}_6\text{F}_5)_3]$ ,  $\text{CDCl}_3$

#### 4. Attempts to reduce $\text{Et}_3\text{Si-I}$ to $\text{Et}_3\text{Si-H}$ by $\text{B}(\text{C}_6\text{F}_5)_3/2,6\text{-Lutidine}$ FLP and $\text{H}_2$

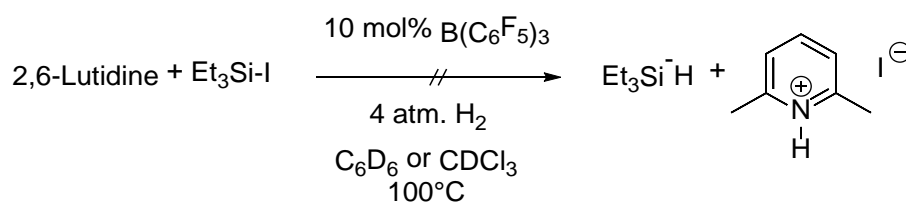

10 mol%  $\text{B}(\text{C}_6\text{F}_5)_3$  (2.6 mg, 0.0051 mmol) in 0.4 mL  $\text{C}_6\text{D}_6$  or 0.4 mL  $\text{CDCl}_3$  was transferred to a J-young tube, followed by the addition of  $\text{Et}_3\text{Si-I}$  (8.9  $\mu\text{L}$ , 0.051 mmol, 10 eq), 2,6-lutidine (6.0  $\mu\text{L}$ , 0.051 mmol, 10 eq). After freeze-pump-thaw degassing, 4 atm.  $\text{H}_2$  was added to the J-young tubes. No reaction was observed after overnight at room temperature. The J-young tubes were heated in a  $100^\circ\text{C}$  oil bath for 40 hours, no formation of  $\text{Et}_3\text{Si-H}$  was seen indicated by the absence of Si-H signal at 3.85 ppm in  $\text{C}_6\text{D}_6$  or 3.61 ppm in  $\text{CDCl}_3$ .<sup>[3]</sup>

#### 5. $\text{B}(\text{C}_6\text{F}_5)_3/2,6\text{-Lutidine}$ FLP and halosilanes with $\text{H}_2/\text{CO}_2$

## General Procedure

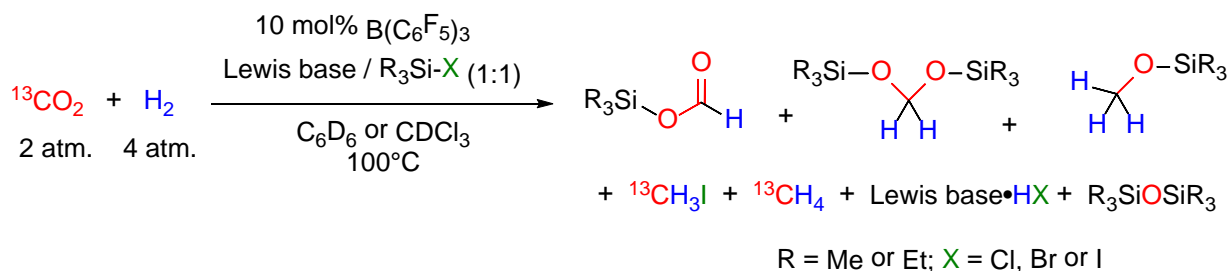

10 mol% B(C<sub>6</sub>F<sub>5</sub>)<sub>3</sub> (2.6 mg, 0.0051 mmol) in 0.4 mL C<sub>6</sub>D<sub>6</sub> was transferred to a J-young tube, followed by the addition of Me<sub>3</sub>Si-I (7.3 μL, 0.051 mmol, 10 eq), 2,6-lutidine (6.0 μL, 0.051 mmol, 10 eq) and 10 μL toluene (internal standard). After freeze-pump-thaw degassing, the solution was kept frozen in a liquid nitrogen bath, 2 atm. <sup>13</sup>CO<sub>2</sub> and 4 atm. H<sub>2</sub> was added to the J-young tube. After warming up back to room temperature, the J-young tube was heated in a 100°C oil bath.

Note: hydrogenation of 2,6-lutidine or 2,4,6-collidine to the corresponding amines was also observed under elongated heating.<sup>[4]</sup>

Entry 1: B(C<sub>6</sub>F<sub>5</sub>)<sub>3</sub>/2,6-Lutidine/Me<sub>3</sub>Si-Cl in C<sub>6</sub>D<sub>6</sub>

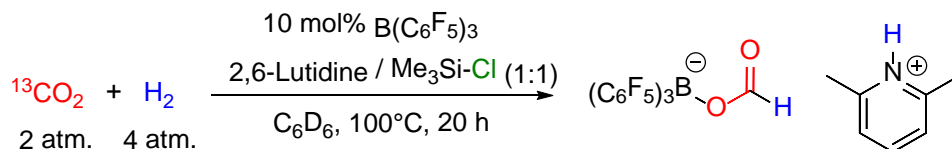

<sup>1</sup>H NMR (400 MHz, C<sub>6</sub>D<sub>6</sub>) δ 8.37 (d, *J* = 209.0 Hz, [C<sub>5</sub>H<sub>3</sub>Me<sub>2</sub>NH][<sup>H</sup><sup>13</sup>CO<sub>2</sub>B(C<sub>6</sub>F<sub>5</sub>)<sub>3</sub>]).

<sup>13</sup>C{<sup>1</sup>H} NMR (101 MHz, C<sub>6</sub>D<sub>6</sub>) δ 169.5 ([C<sub>5</sub>H<sub>3</sub>Me<sub>2</sub>NH][<sup>H</sup><sup>13</sup>CO<sub>2</sub>B(C<sub>6</sub>F<sub>5</sub>)<sub>3</sub>]); <sup>13</sup>C NMR (101 MHz, C<sub>6</sub>D<sub>6</sub>) δ 169.5 (d, *J* = 208.3 Hz, [C<sub>5</sub>H<sub>3</sub>Me<sub>2</sub>NH][<sup>H</sup><sup>13</sup>CO<sub>2</sub>B(C<sub>6</sub>F<sub>5</sub>)<sub>3</sub>]).



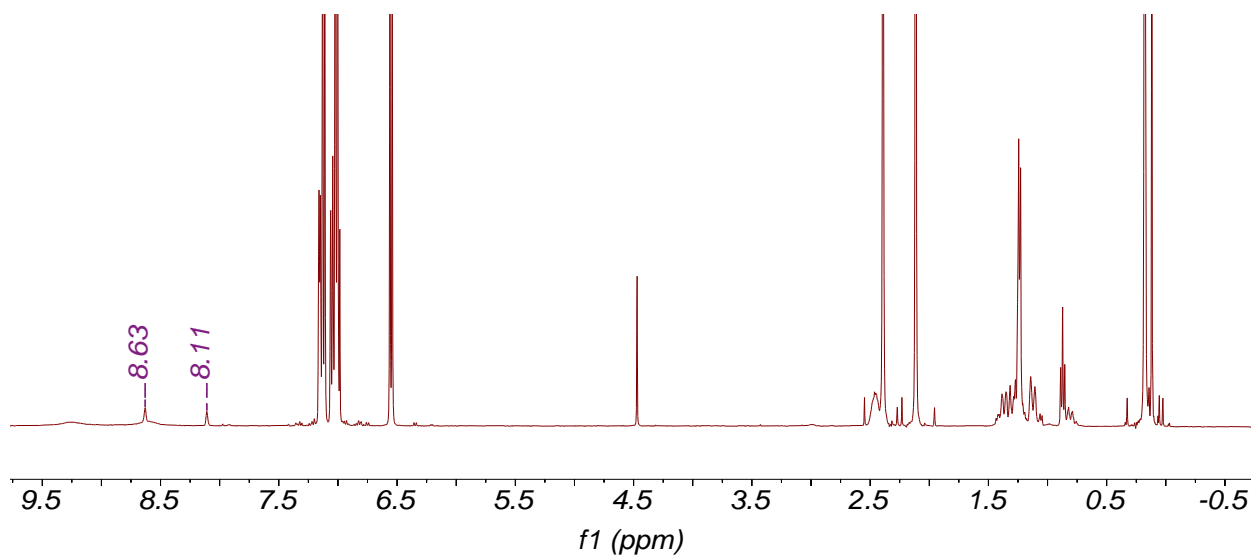

Figure S 10.  $^1\text{H}$  NMR of  $\text{B}(\text{C}_6\text{F}_5)_3/2,6\text{-Lutidine}/\text{Me}_3\text{Si-Cl}$ , 20 hours at  $100^\circ\text{C}$ ,  $\text{C}_6\text{D}_6$

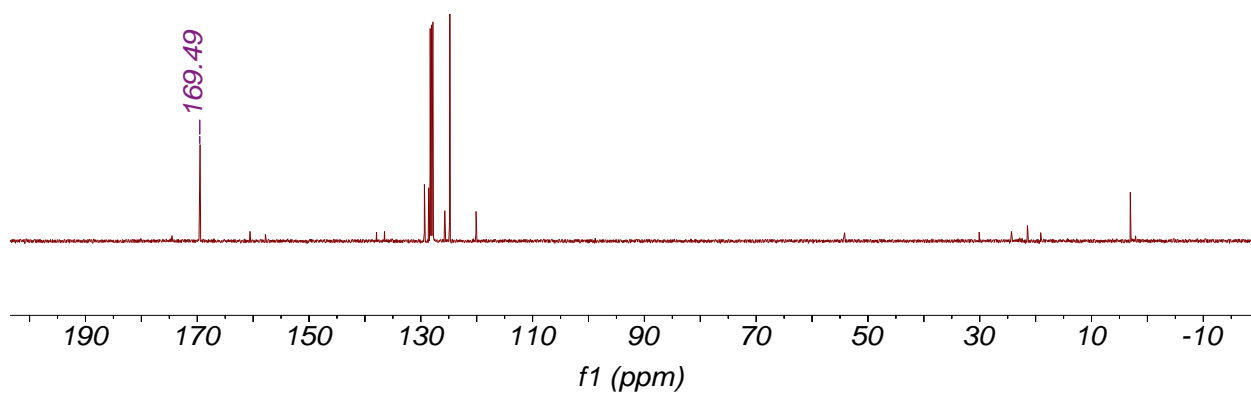

Figure S 11.  $^{13}\text{C}\{^1\text{H}\}$  NMR of  $\text{B}(\text{C}_6\text{F}_5)_3/2,6\text{-Lutidine}/\text{Me}_3\text{Si-Cl}$ , 20 hours at  $100^\circ\text{C}$ ,  $\text{C}_6\text{D}_6$

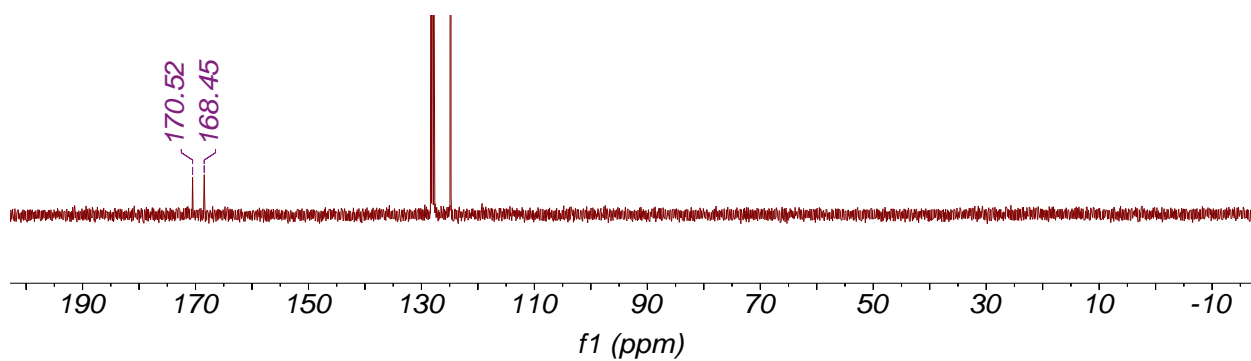

Figure S 12.  $^{13}\text{C}$  NMR of  $\text{B}(\text{C}_6\text{F}_5)_3/2,6\text{-Lutidine}/\text{Me}_3\text{Si-Cl}$ , 20 hours at  $100^\circ\text{C}$ ,  $\text{C}_6\text{D}_6$

Entry 2:  $\text{B}(\text{C}_6\text{F}_5)_3/2,6\text{-Lutidine}/\text{Me}_3\text{Si-Cl}$  in  $\text{CDCl}_3$

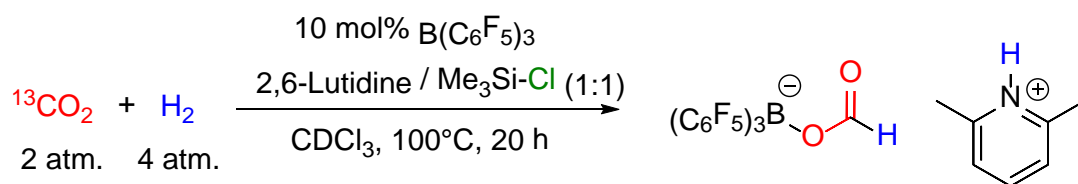

$^1\text{H}$  NMR (400 MHz,  $\text{CDCl}_3$ )  $\delta$  8.24 (d,  $J = 209.1$  Hz,  $[\text{C}_5\text{H}_3\text{Me}_2\text{NH}][\text{H}^{13}\text{CO}_2\text{B}(\text{C}_6\text{F}_5)_3]$ );

$^{13}\text{C}\{^1\text{H}\}$  NMR (101 MHz,  $\text{CDCl}_3$ )  $\delta$  169.4 ( $[\text{C}_5\text{H}_3\text{Me}_2\text{NH}][\text{H}^{13}\text{CO}_2\text{B}(\text{C}_6\text{F}_5)_3]$ ).

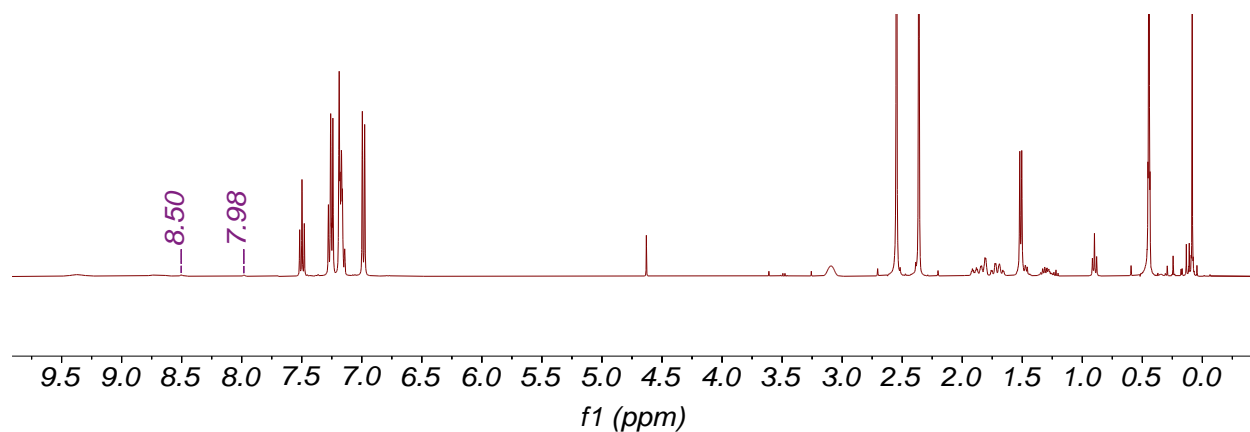

Figure S 13.  $^1\text{H}$  NMR of  $\text{B}(\text{C}_6\text{F}_5)_3/2,6\text{-Lutidine}/\text{Me}_3\text{Si-Cl}$ , 20 hours at  $100^\circ\text{C}$ ,  $\text{CDCl}_3$

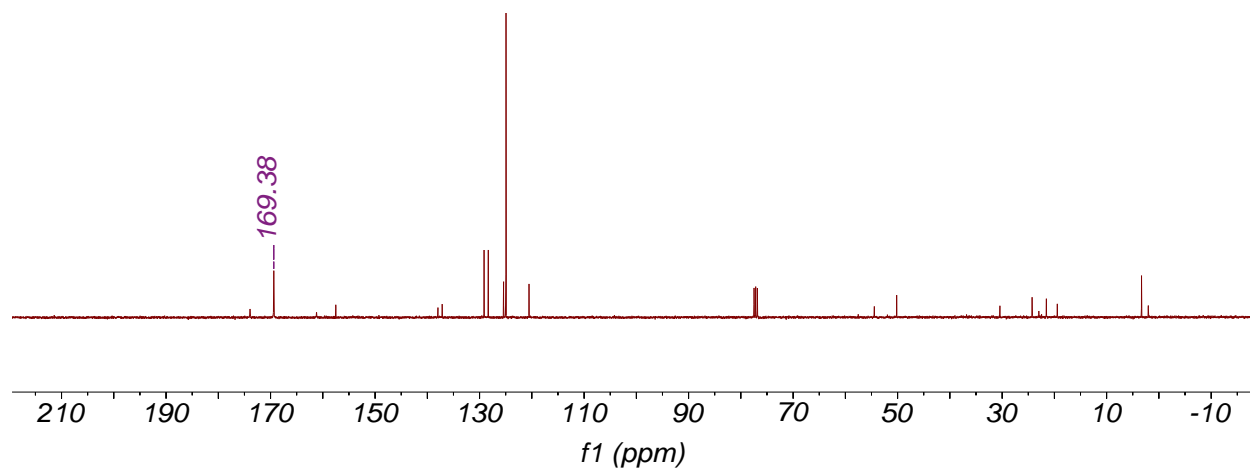

Figure S 14.  $^{13}\text{C}\{^1\text{H}\}$  NMR of  $\text{B}(\text{C}_6\text{F}_5)_3/2,6\text{-Lutidine}/\text{Me}_3\text{Si-Cl}$ , 20 hours at  $100^\circ\text{C}$ ,  $\text{CDCl}_3$

Entry 3:  $\text{B}(\text{C}_6\text{F}_5)_3/2,6\text{-Lutidine}/\text{Me}_3\text{Si-Br}$  in  $\text{C}_6\text{D}_6$

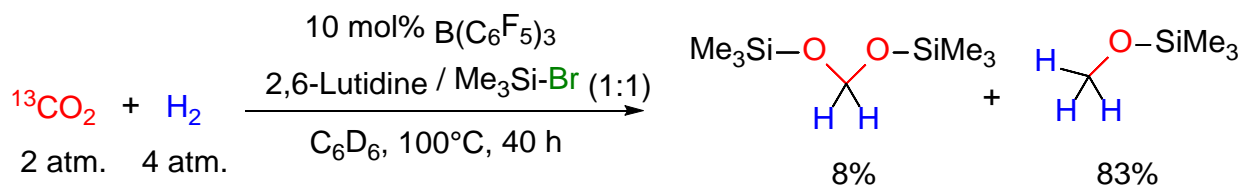

$^1\text{H}$  NMR (400 MHz,  $\text{C}_6\text{D}_6$ )  $\delta$  5.02 (d,  $J = 162.3$  Hz,  $(\text{Me}_3\text{SiO})_2^{13}\text{CH}_2$ ), 3.25 (d,  $J = 141.0$  Hz,  $\text{Me}_3\text{SiO}^{13}\text{CH}_3$ ).

$^{13}\text{C}\{^1\text{H}\}$  NMR (101 MHz,  $\text{C}_6\text{D}_6$ )  $\delta$  84.4 ( $(\text{Me}_3\text{SiO})_2^{13}\text{CH}_2$ ), 49.9 ( $\text{Me}_3\text{SiO}^{13}\text{CH}_3$ ).

Overall yield = 91% at 40 hours,  $(\text{Me}_3\text{SiO})_2^{13}\text{CH}_2$ :  $\text{Me}_3\text{SiO}^{13}\text{CH}_3$  = 1:11

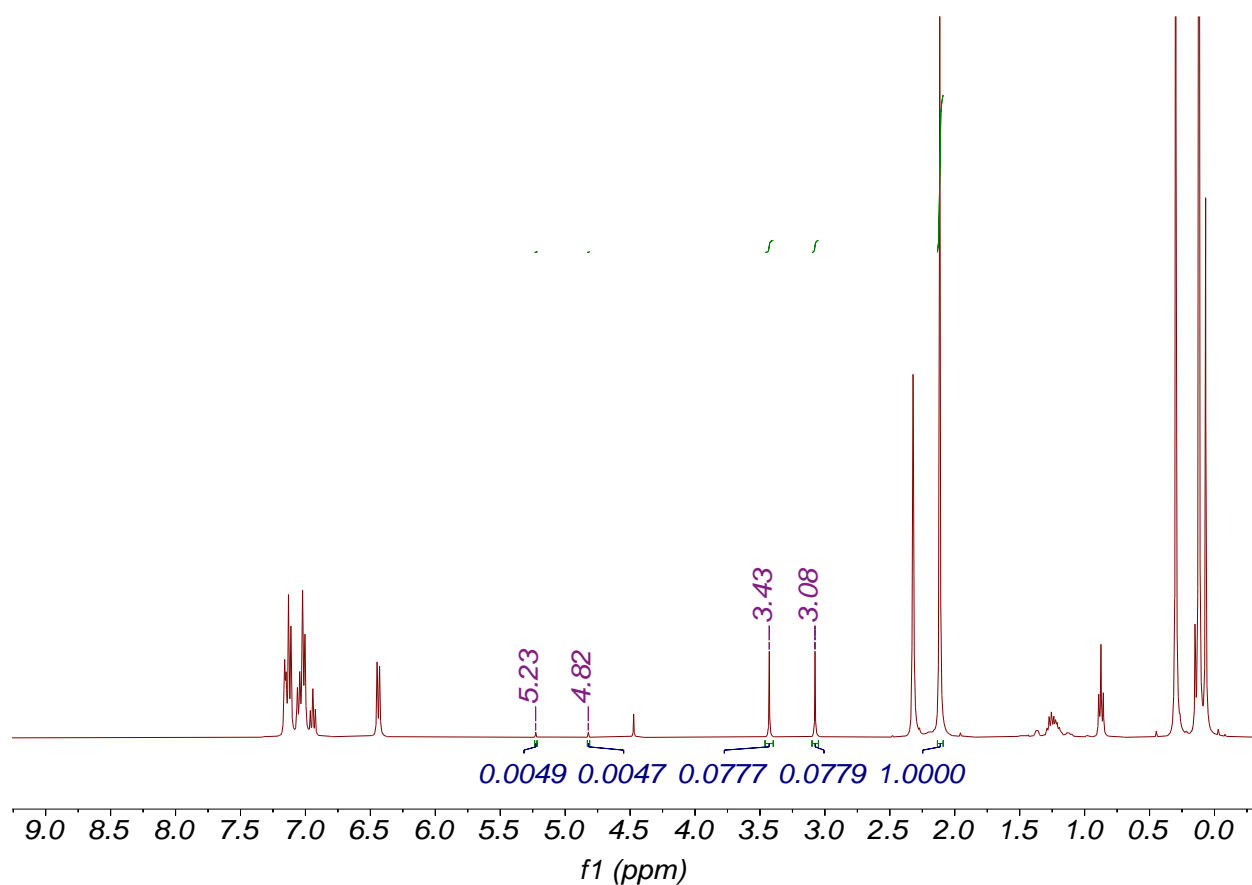

Figure S 15.  $^1\text{H}$  NMR of  $\text{B}(\text{C}_6\text{F}_5)_3/2,6\text{-Lutidine}/\text{Me}_3\text{Si-Br}$ , 40 hours at  $100^\circ\text{C}$ ,  $\text{C}_6\text{D}_6$

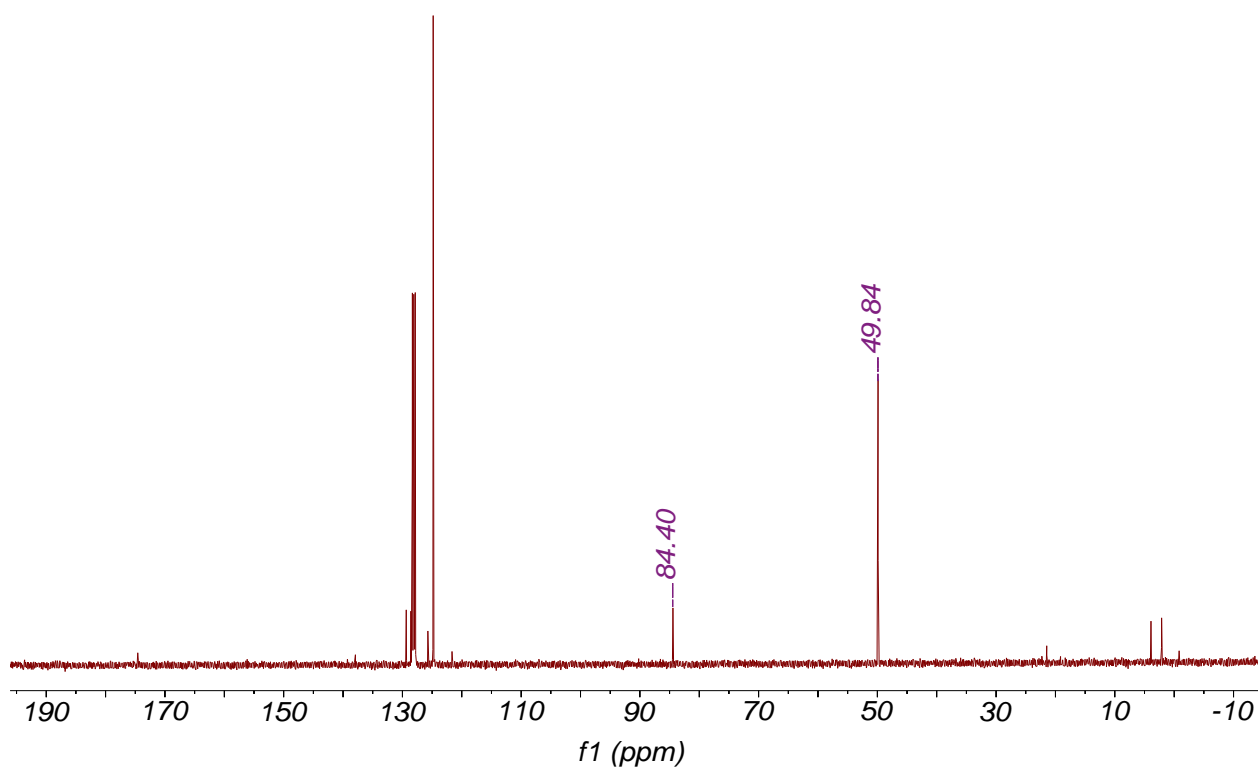

Figure S 16.  $^{13}\text{C}\{^1\text{H}\}$  NMR of  $\text{B}(\text{C}_6\text{F}_5)_3/2,6\text{-Lutidine}/\text{Me}_3\text{Si-Br}$ , 40 hours at  $100^\circ\text{C}$ ,  $\text{C}_6\text{D}_6$

Entry 4:  $\text{B}(\text{C}_6\text{F}_5)_3/2,6\text{-Lutidine}/\text{Me}_3\text{Si-Br}$  in  $\text{CDCl}_3$

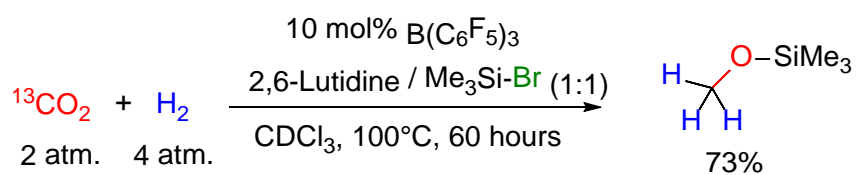

$^1\text{H}$  NMR (400 MHz,  $\text{CDCl}_3$ )  $\delta$  3.43 (d,  $J = 141.5$  Hz,  $\text{Me}_3\text{SiO}^{13}\text{CH}_3$ ).

$^{13}\text{C}\{^1\text{H}\}$  NMR (101 MHz,  $\text{CDCl}_3$ )  $\delta$  50.2 ( $\text{Me}_3\text{SiO}^{13}\text{CH}_3$ );  $^{13}\text{C}$  NMR (101 MHz,  $\text{CDCl}_3$ )  $\delta$  50.2 (q,  $J = 141.5$  Hz,  $\text{Me}_3\text{SiO}^{13}\text{CH}_3$ ).

Overall yield = 73% at 60 hours,  $\text{Me}_3\text{SiO}^{13}\text{CH}_3$  only

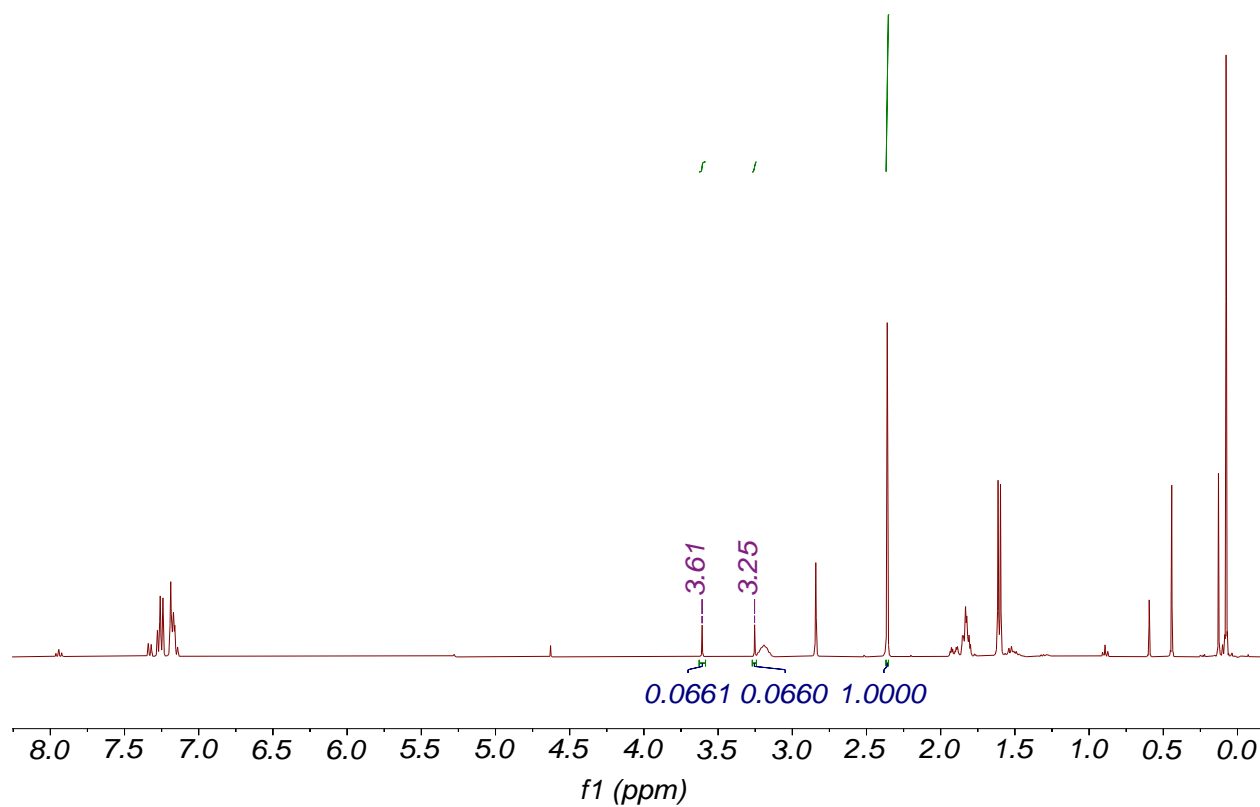

Figure S 17.  $^1\text{H}$  NMR of  $\text{B}(\text{C}_6\text{F}_5)_3/2,6\text{-Lutidine}/\text{Me}_3\text{Si-Br}$ , 60 hours at  $100^\circ\text{C}$ ,  $\text{CDCl}_3$

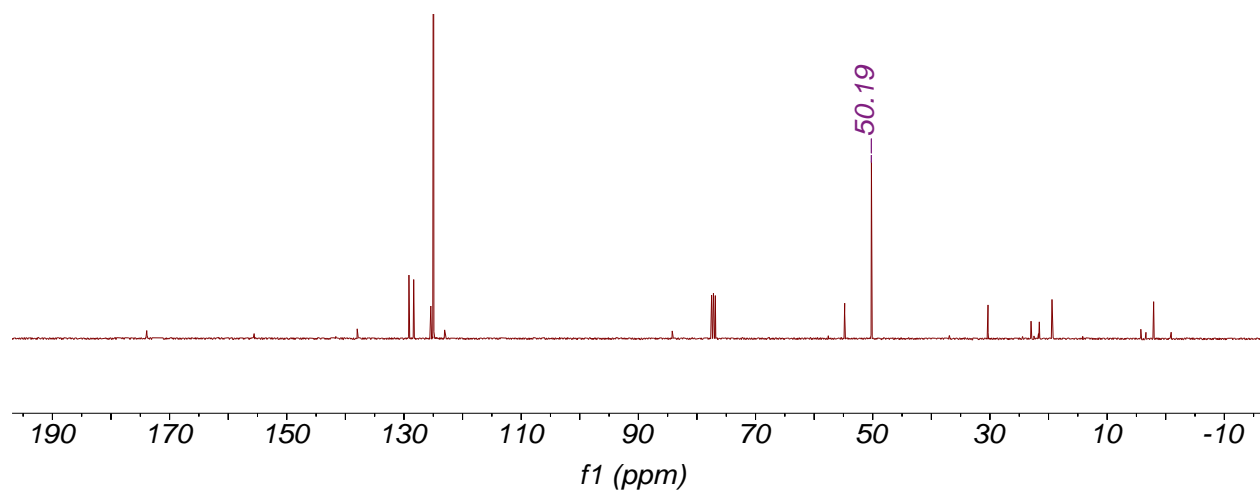

Figure S 18.  $^{13}\text{C}\{^1\text{H}\}$  NMR of  $\text{B}(\text{C}_6\text{F}_5)_3/2,6\text{-Lutidine}/\text{Me}_3\text{Si-Br}$ , 60 hours at  $100^\circ\text{C}$ ,  $\text{CDCl}_3$

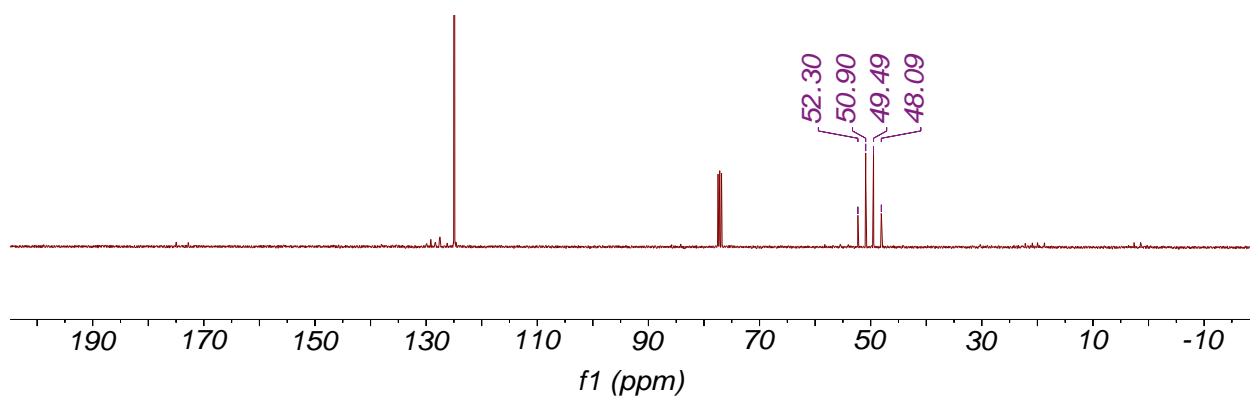

Figure S 19.  $^{13}\text{C}$  NMR of  $\text{B}(\text{C}_6\text{F}_5)_3/2,6\text{-Lutidine}/\text{Me}_3\text{Si-Br}$ , 60 hours at  $100^\circ\text{C}$ ,  $\text{CDCl}_3$

Entry 5:  $\text{B}(\text{C}_6\text{F}_5)_3/2,6\text{-Lutidine}/\text{Me}_3\text{Si-I}$  in  $\text{C}_6\text{D}_6$

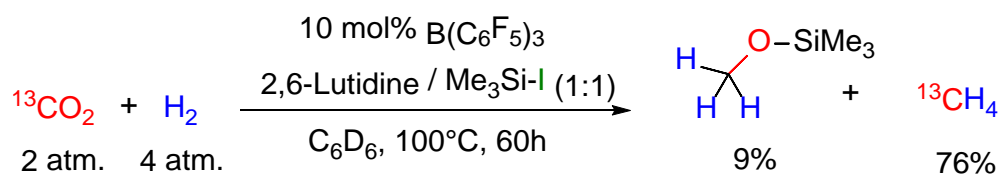

$^1\text{H}$  NMR (400 MHz,  $\text{C}_6\text{D}_6$ )  $\delta$  3.25 (d,  $J = 141.0$  Hz,  $\text{Me}_3\text{SiO}^{13}\text{CH}_3$ );

$^{13}\text{C}\{^1\text{H}\}$  NMR (101 MHz,  $\text{C}_6\text{D}_6$ )  $\delta$  49.8 ( $\text{Me}_3\text{SiO}^{13}\text{CH}_3$ ), -4.3 ( $^{13}\text{CH}_4$ );

$^{13}\text{C}$  NMR (101 MHz,  $\text{C}_6\text{D}_6$ )  $\delta$  49.8 (q,  $J = 141.0$  Hz,  $\text{Me}_3\text{SiO}^{13}\text{CH}_3$ ), -4.3 (p,  $J = 125.6$  Hz,  $^{13}\text{CH}_4$ ).

Overall yield = 85% at 60 hours.  $^{13}\text{CH}_4$ :  $\text{Me}_3\text{SiO}^{13}\text{CH}_3 = 8.4:1$

❖ *The overall yield at 60 hours = yield of methoxy species + yield of  $^{13}\text{CH}_4$ .*

*(The yield of  $^{13}\text{CH}_4$  was determined based on the method reported by Chen et al<sup>[2]</sup>, the solubility of methane is estimated to be 0.021 M/atm according to the reported value and Henry's law<sup>[5]</sup>)*

1. Number of methoxy species is determined from  $^1\text{H}$  NMR spectrum, using 0.01 mL toluene as internal standard
2. Number of protons in the methyl groups of 0.01 mL toluene:  $0.01 \text{ mL} * 0.867 \text{ (g/mL)} / 92.14 \text{ (g/mol)} * 3 * 1000 \text{ (mmol/mol)} = 0.2823 \text{ mmol}$
3. Number of methoxy species = number of protons in the methyl groups of 0.01 mL toluene \* ( $\frac{1}{3}$  \* integration of acetal species / integration of methyl group of toluene) =  $\frac{1}{3} * 0.2823 \text{ mmol} * 0.017 = 0.0016 \text{ mmol}$
4. Yield of methoxy species = number of methoxy species / theoretical number of methoxy species =  $0.0016 \text{ mmol} / 0.017 \text{ mmol} * 100\% = 9\%$
5. The total number of methane = number of methane in solution ( $n_{\text{solution}}$ ) + number of methane in gas phase( $n_{\text{gas}}$ )
6. Number of methane in solution ( $n_{\text{solution}}$ ) is derived from the integration of methoxy species in  $^{13}\text{C}$  NMR spectrum
7. Number of methane in solution ( $n_{\text{solution}}$ ) = integration of methane / integration of methoxy species \* number of methoxy species =  $(0.5261 / 1) * 0.0016 \text{ mmol} = 0.00084 \text{ mmol}$
8. Concentration of methane in solution = number of methane in solution / volume of solution =  $0.00084 \text{ mmol} / 0.4 \text{ mL} = 0.0021 \text{ mmol/mL} = 0.0021 \text{ M}$
9. Pressure of methane in gas phase (P) = concentration of methane in solution /  $K_{\text{H}} = 0.0021 \text{ M} / 0.021 \text{ M/atm} = 0.1 \text{ atm}$
10. Number of methane in gas phase( $n_{\text{gas}}$ ) is determined using ideal gas law:  $n_{\text{gas}} = PV/RT = 0.1 \text{ atm} * 2.2 \text{ mL} / 82.057 \text{ mL atm K}^{-1} \text{ mol}^{-1} / 298.15 \text{ K} * 1000 \text{ mmol/mol} = 0.0090 \text{ mmol}$
11. The total number of methane = number of methane in solution ( $n_{\text{solution}}$ ) + number of methane in gas phase( $n_{\text{gas}}$ ) =  $0.00084 \text{ mmol} + 0.0090 \text{ mmol} = 0.0098 \text{ mmol}$
12. Yield of methane = total number of methane / theoretical number of methane =  $0.0098 \text{ mmol} / 0.01285 \text{ mmol} * 100\% = 76\%$
13. The overall yield = yield of methane + yield of methoxy species =  $76\% + 9\% = 85\%$
14. The ratio of methane: methoxy species =  $76\% : 9\% = 8.4 : 1$

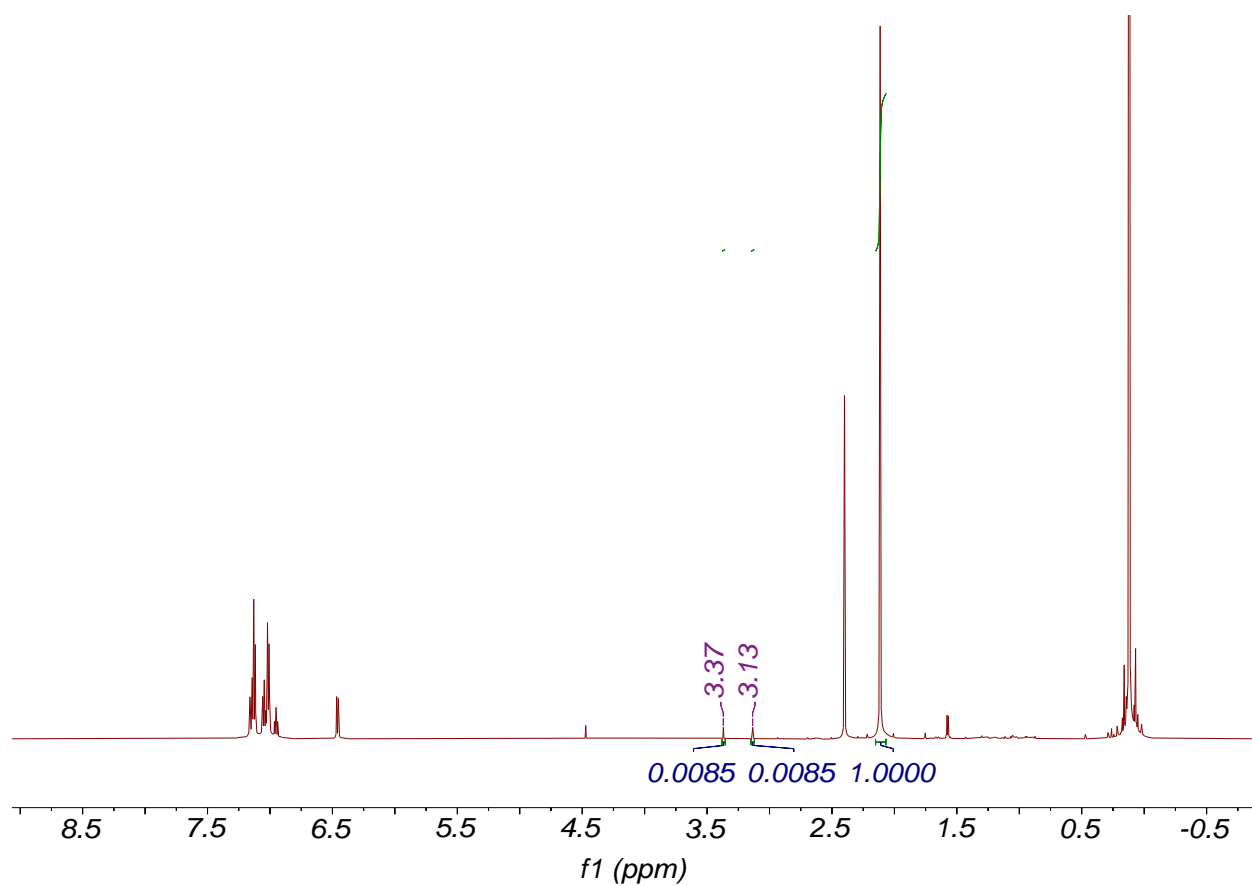

Figure S 20.  $^1\text{H}$  NMR of  $\text{B}(\text{C}_6\text{F}_5)_3/2,6\text{-Lutidine}/\text{Me}_3\text{Si-I}$ , 60 hours at  $100^\circ\text{C}$ ,  $\text{C}_6\text{D}_6$

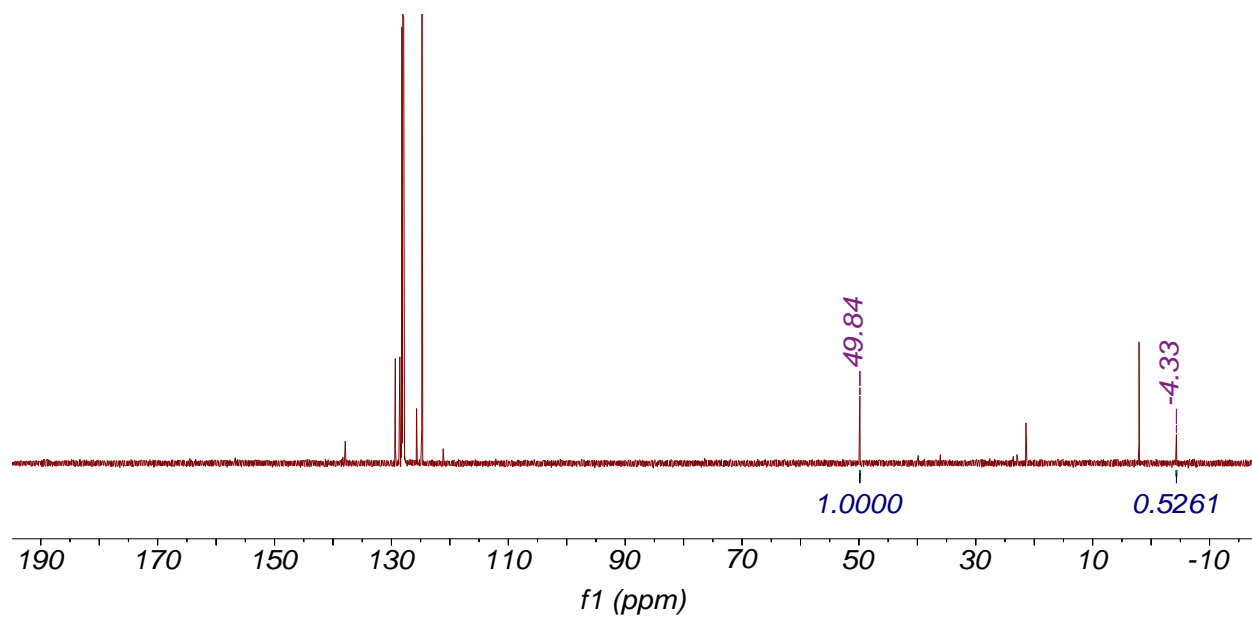

Figure S 21.  $^{13}\text{C}\{^1\text{H}\}$  NMR of  $\text{B}(\text{C}_6\text{F}_5)_3/2,6\text{-Lutidine}/\text{Me}_3\text{Si-I}$ , 60 hours at  $100^\circ\text{C}$ ,  $\text{C}_6\text{D}_6$



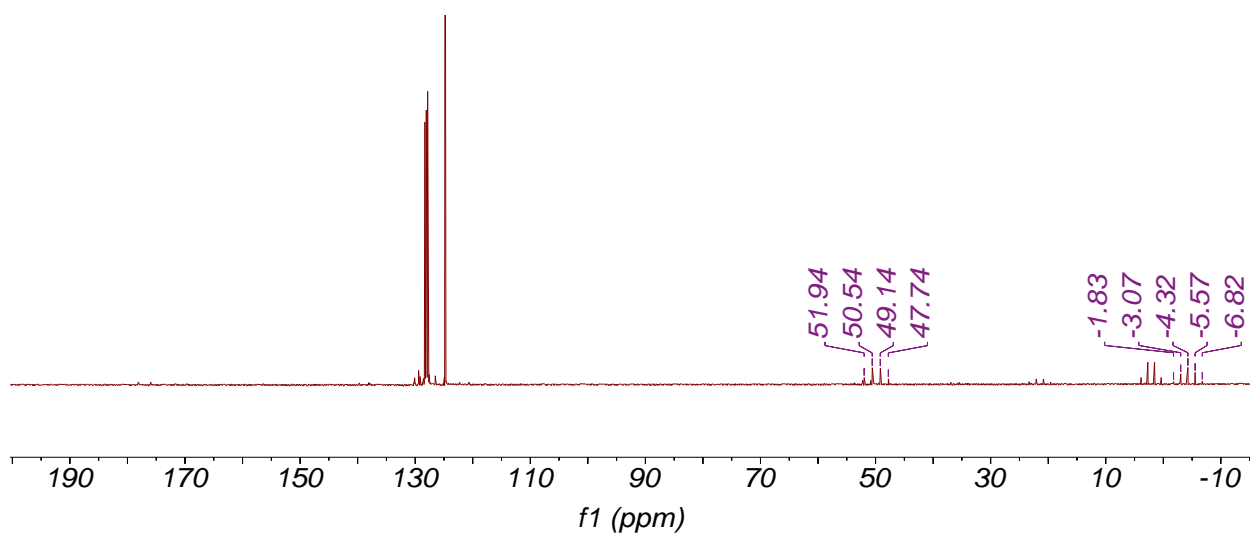

Figure S 22.  $^{13}\text{C}$  NMR of  $\text{B}(\text{C}_6\text{F}_5)_3/2,6\text{-Lutidine}/\text{Me}_3\text{Si-I}$ , 60 hours at  $100^\circ\text{C}$ ,  $\text{C}_6\text{D}_6$

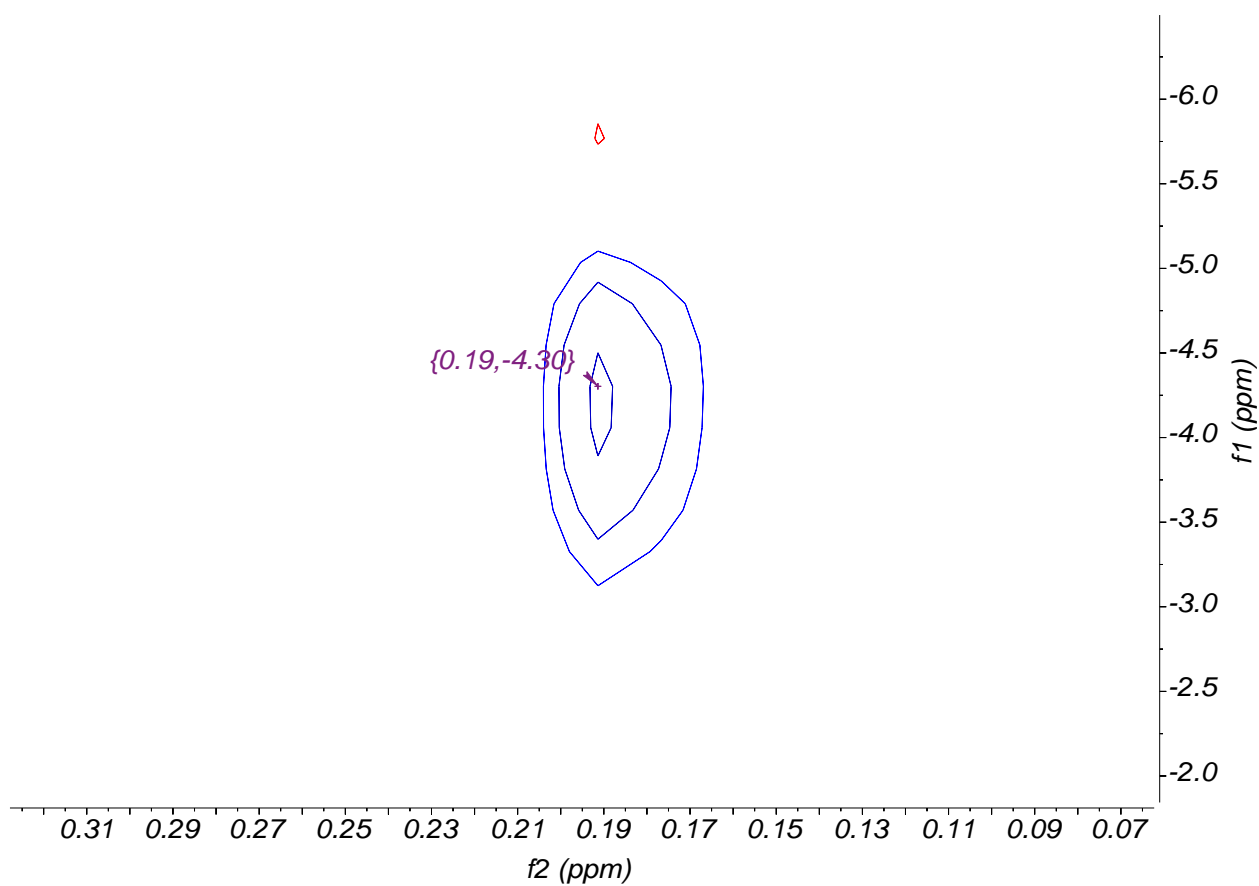

Figure S 23. HSQC spectrum of  $\text{B}(\text{C}_6\text{F}_5)_3/2,6\text{-Lutidine}/\text{Me}_3\text{Si-I}$ , 60 hours at  $100^\circ\text{C}$ ,  $\text{C}_6\text{D}_6$

Entry 6:  $\text{B}(\text{C}_6\text{F}_5)_3/2,6\text{-Lutidine}/\text{Me}_3\text{Si-I}$  in  $\text{CDCl}_3$

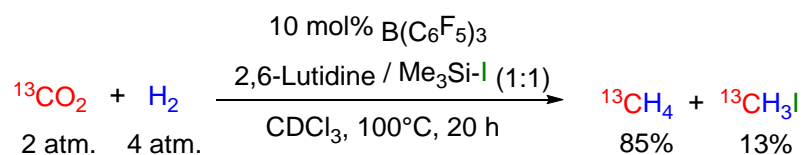

$^1\text{H}$  NMR (400 MHz,  $\text{CDCl}_3$ )  $\delta$  2.15 (d,  $J = 151.2$  Hz,  ${}^{13}\text{CH}_3\text{I}$ ), 0.23 (d,  $J = 125.6$  Hz,  ${}^{13}\text{CH}_4$ ).

${}^{13}\text{C}\{^1\text{H}\}$  NMR (101 MHz,  $\text{CDCl}_3$ )  $\delta$  -4.2 ( ${}^{13}\text{CH}_4$ ), -23.5 ( ${}^{13}\text{CH}_3\text{I}$ );  ${}^{13}\text{C}$  NMR (101 MHz,  $\text{CDCl}_3$ )  $\delta$  -4.2 (p,  $J = 125.6$  Hz,  ${}^{13}\text{CH}_4$ , observed as a triplet due to low intensity), -23.5 (q,  $J = 151.3$  Hz,  ${}^{13}\text{CH}_3\text{I}$ ).

Overall yield = 98% at 20 hours,  ${}^{13}\text{CH}_4$ :  ${}^{13}\text{CH}_3\text{I} = 6.5:1$

❖ *The yield of  $^{13}\text{CH}_3\text{I}$  at 20 hours:*

1. The total number of  $^{13}\text{CH}_3\text{I}$  is calculated from the integration in  $^1\text{H}$  NMR spectrum using 0.01 mL toluene as internal standard.
2. Number of protons in the methyl groups of 0.01 mL toluene:  $0.01 \text{ mL} * 0.867 \text{ (g/mL)} / 92.14 \text{ (g/mol)} * 3 * 1000 \text{ (mmol/mol)} = 0.2823 \text{ mmol}$
3. Number of  $^{13}\text{CH}_3\text{I}$  = number of protons in the methyl groups of 0.01 mL toluene \* ( $\frac{1}{3}$ \* integration of  $^{13}\text{C-H}_3\text{I}$  / integration of methyl group of toluene) =  $\frac{1}{3} * 0.2823 \text{ mmol} * 0.0184 = 0.0017 \text{ mmol}$
4. Yield of  $^{13}\text{CH}_3\text{I}$  = number of  $^{13}\text{CH}_3\text{I}$  / theoretical number of  $^{13}\text{CH}_3\text{I}$  =  $0.0017 \text{ mmol} / 0.01285 \text{ mmol} * 100\% = 13\%$

❖ *The yield of  $^{13}\text{CH}_4$  at 20 hours:*

1. The total number of methane = number of methane in solution ( $n_{\text{solution}}$ ) + number of methane in gas phase ( $n_{\text{gas}}$ ).
2. Number of methane in solution ( $n_{\text{solution}}$ ) is derived from the integration in  $^1\text{H}$  NMR spectrum using 0.01 mL toluene as internal standard.
3. Number of protons in the methyl groups of 0.01 mL toluene:  $0.01 \text{ mL} * 0.867 \text{ (g/mL)} / 92.14 \text{ (g/mol)} * 3 * 1000 \text{ (mmol/mol)} = 0.2823 \text{ mmol}$
4. Number of methane in solution = number of protons in the methyl groups of 0.01 mL toluene \* ( $\frac{1}{4}$ \* integration of  $^{13}\text{C-H}_4$  / integration of methyl group of toluene) =  $\frac{1}{4} * 0.2823 \text{ mmol} * 0.0132 = 0.00093 \text{ mmol}$
5. Concentration of methane in solution = number of methane in solution / volume of solution =  $0.00093 \text{ mmol} / 0.4 \text{ mL} = 0.0023 \text{ mmol/mL} = 0.0023 \text{ M}$
6. Pressure of methane in gas phase (P) = concentration of methane in solution /  $K_{\text{H}} = 0.0023 \text{ M} / 0.021 \text{ M/atm} = 0.11 \text{ atm}$
7. Number of methane in gas phase ( $n_{\text{gas}}$ ) is determined using ideal gas law:  $n_{\text{gas}} = PV/RT = 0.11 \text{ atm} * 2.2 \text{ mL} / 82.057 \text{ mL atm K}^{-1} \text{ mol}^{-1} / 298.15 \text{ K} * 1000 \text{ mmol/mol} = 0.010 \text{ mmol}$
8. The total number of methane = number of methane in solution ( $n_{\text{solution}}$ ) + number of methane in gas phase ( $n_{\text{gas}}$ ) =  $0.00093 \text{ mmol} + 0.010 \text{ mmol} = 0.0109 \text{ mmol}$
9. Yield of methane = total number of methane / theoretical number of methane =  $0.0109 \text{ mmol} / 0.01285 \text{ mmol} * 100\% = 85\%$
10. The overall yield = yield of  $^{13}\text{CH}_4$  + yield of  $^{13}\text{CH}_3\text{I}$  =  $85\% + 13\% = 98\%$
11. The ratio of  $^{13}\text{CH}_4$ :  $^{13}\text{CH}_3\text{I}$  =  $85\% : 13\% = 6.5:1$

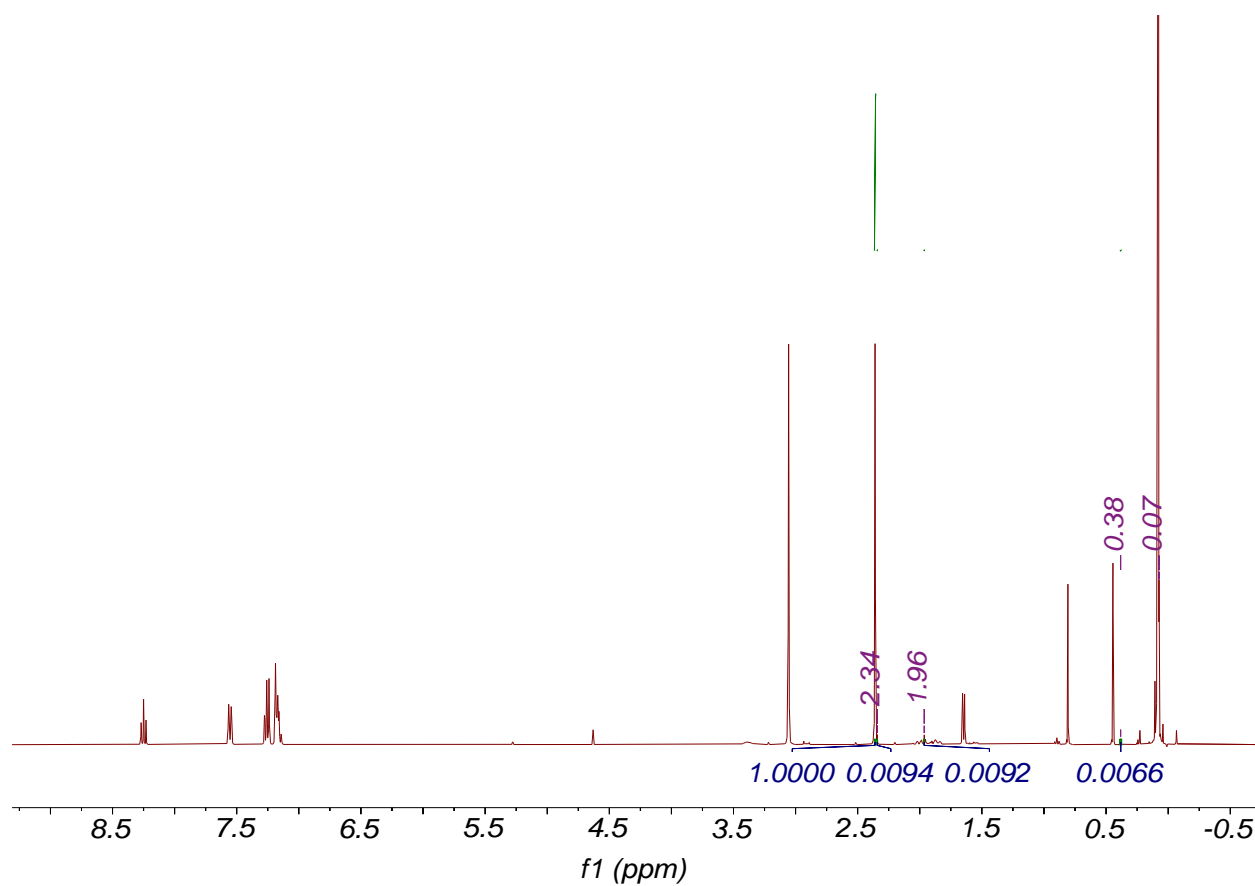

Figure S 24.  $^1\text{H}$  NMR of  $\text{B}(\text{C}_6\text{F}_5)_3/2,6\text{-Lutidine}/\text{Me}_3\text{Si-I}$ , 20 hours at  $100^\circ\text{C}$ ,  $\text{CDCl}_3$

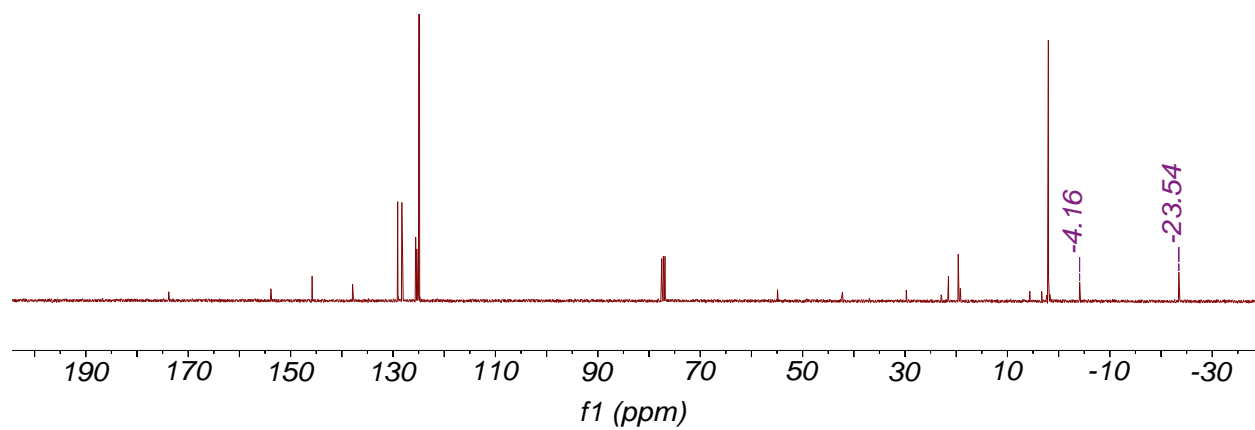

Figure S 25.  $^{13}\text{C}\{^1\text{H}\}$  NMR of  $\text{B}(\text{C}_6\text{F}_5)_3/2,6\text{-Lutidine}/\text{Me}_3\text{Si-I}$ , 20 hours at  $100^\circ\text{C}$ ,  $\text{CDCl}_3$

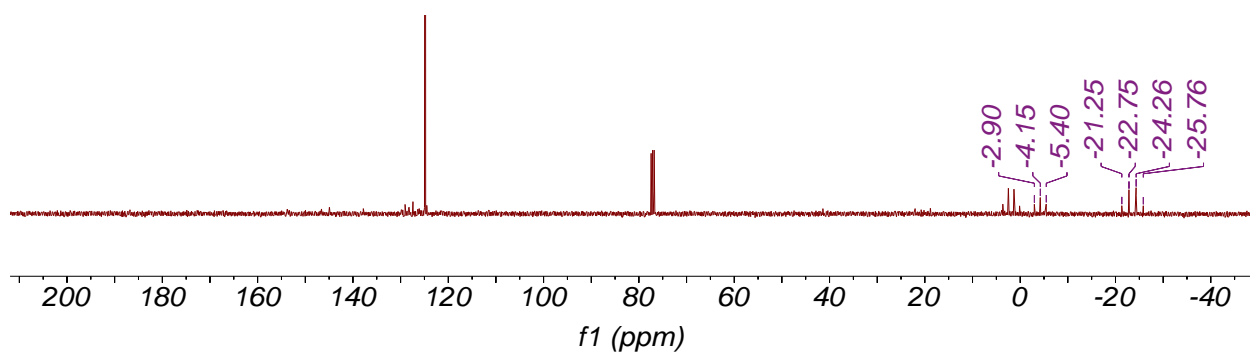

Figure S 26.  $^{13}\text{C}$  NMR of  $\text{B}(\text{C}_6\text{F}_5)_3/2,6\text{-Lutidine}/\text{Me}_3\text{Si-I}$ , 20 hours at  $100^\circ\text{C}$ ,  $\text{CDCl}_3$

Entry 7:  $\text{B}(\text{C}_6\text{F}_5)_3/2,6\text{-Lutidine}/\text{Et}_3\text{Si-I}$  in  $\text{C}_6\text{D}_6$

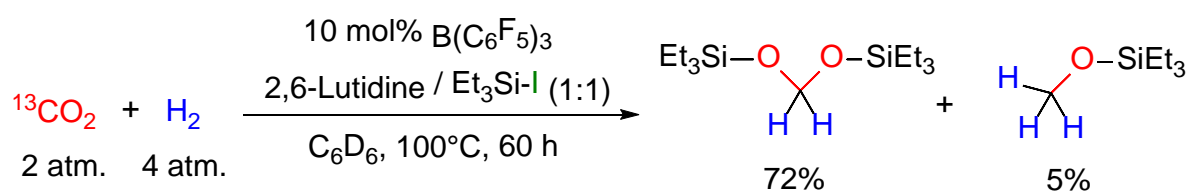

$^1\text{H}$  NMR (600 MHz,  $\text{C}_6\text{D}_6$ )  $\delta$  5.06 (d,  $J = 161.7$  Hz,  $(\text{Et}_3\text{SiO})_2^{13}\text{CH}_2$ ), 3.31 (d,  $J = 141.0$  Hz,  $\text{Et}_3\text{SiO}^{13}\text{CH}_3$ ).

$^{13}\text{C}\{^1\text{H}\}$  NMR (101 MHz,  $\text{C}_6\text{D}_6$ )  $\delta$  84.5 ( $(\text{Et}_3\text{SiO})_2^{13}\text{CH}_2$ ), 50.5 ( $\text{Et}_3\text{SiO}^{13}\text{CH}_3$ ).

Overall yield = 77% at 60 hours,  $(\text{Et}_3\text{SiO})_2^{13}\text{CH}_2$ :  $\text{Et}_3\text{SiO}^{13}\text{CH}_3$  = 19:1

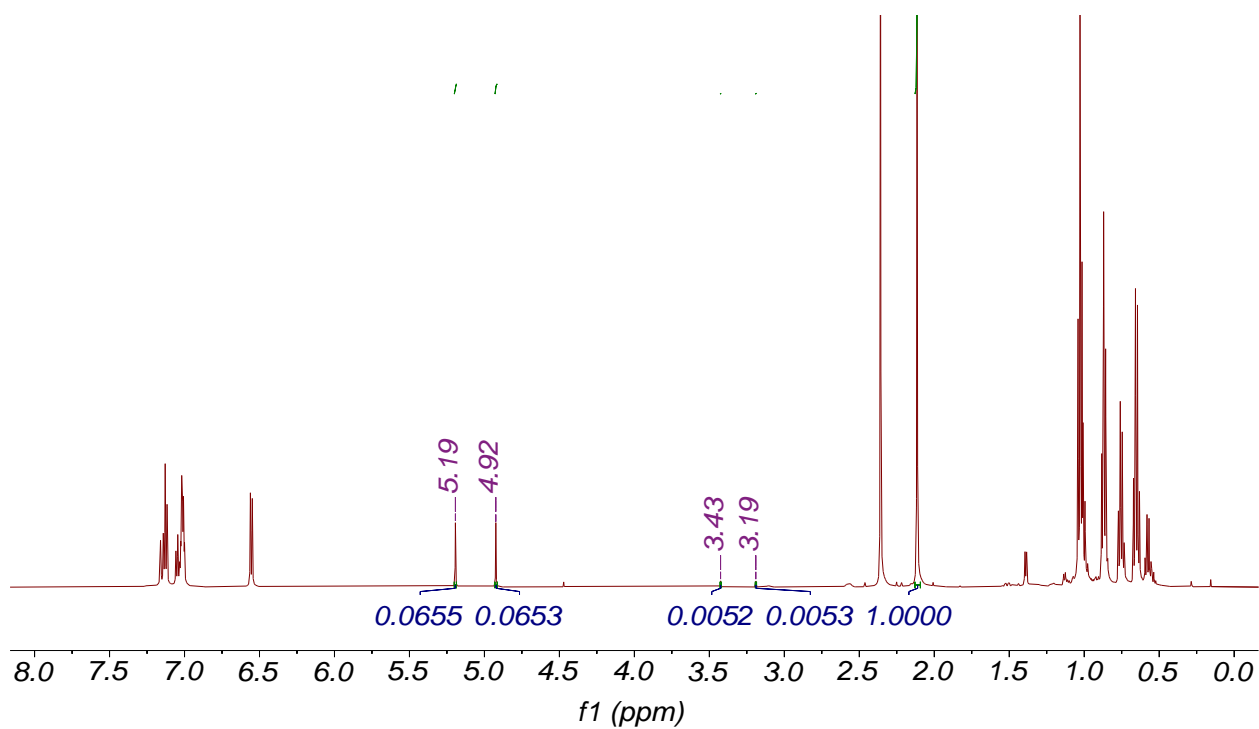

Figure S 27.  $^1\text{H}$  NMR of  $\text{B}(\text{C}_6\text{F}_5)_3/2,6\text{-Lutidine}/\text{Et}_3\text{Si-I}$ , 60 hours at  $100^\circ\text{C}$ ,  $\text{C}_6\text{D}_6$

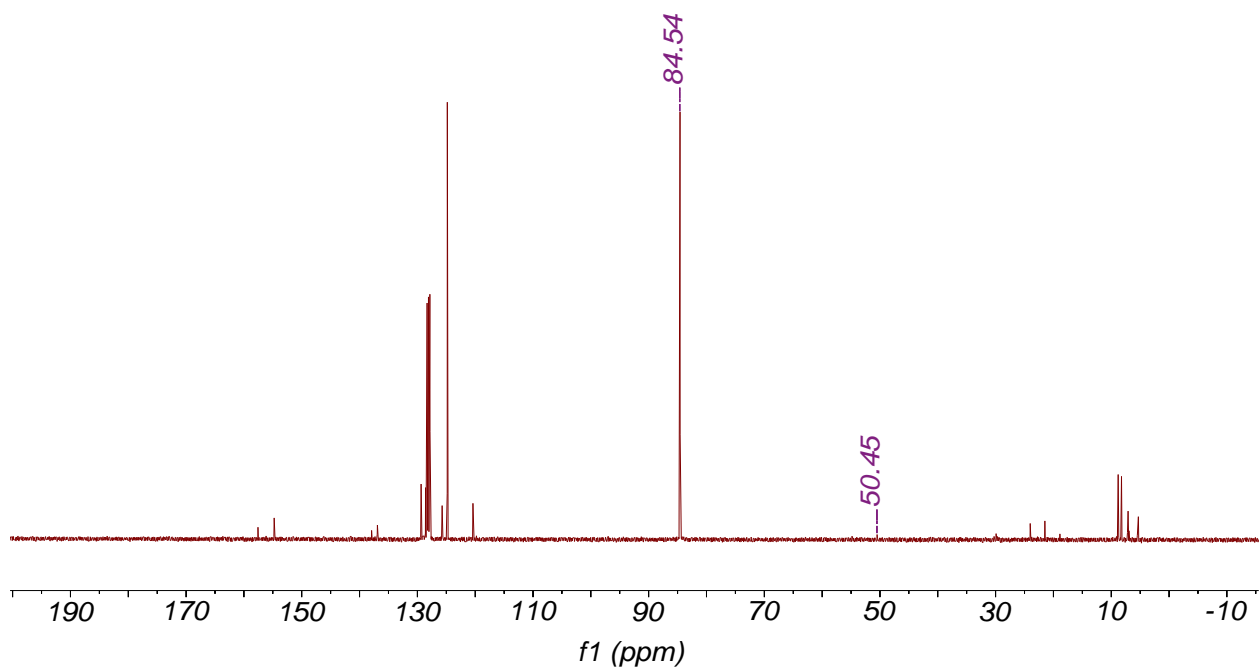

Figure S 28.  $^{13}\text{C}\{^1\text{H}\}$  NMR of  $\text{B}(\text{C}_6\text{F}_5)_3/2,6\text{-Lutidine}/\text{Et}_3\text{Si-I}$ , 60 hours at  $100^\circ\text{C}$ ,  $\text{C}_6\text{D}_6$

Entry 8:  $\text{B}(\text{C}_6\text{F}_5)_3/2,6\text{-Lutidine}/\text{Et}_3\text{Si-I}$  in  $\text{CDCl}_3$

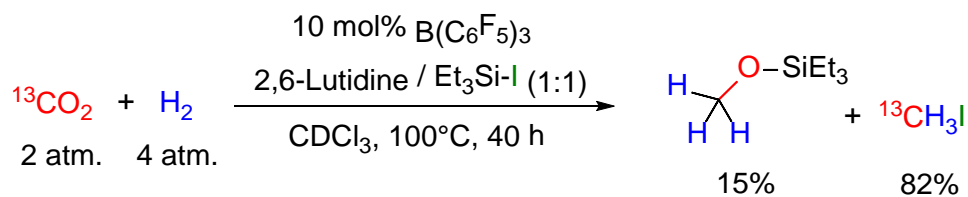

$^1\text{H}$  NMR (400 MHz,  $\text{CDCl}_3$ )  $\delta$  3.47 (d,  $J = 141.5$  Hz,  $\text{Et}_3\text{SiO}^{13}\text{CH}_3$ ), 2.14 (d,  $J = 151.2$  Hz,  $^{13}\text{CH}_3\text{I}$ ).

$^{13}\text{C}$  NMR (101 MHz,  $\text{CDCl}_3$ )  $\delta$  50.8 (q,  $J = 141.4$  Hz,  $\text{Et}_3\text{SiO}^{13}\text{CH}_3$ ), -23.5 (q,  $J = 151.2$  Hz,  $^{13}\text{CH}_3\text{I}$ ).

Overall yield = 97% at 40 hours,  $^{13}\text{CH}_3\text{I} : \text{Et}_3\text{SiO}^{13}\text{CH}_3 = 5.5:1$

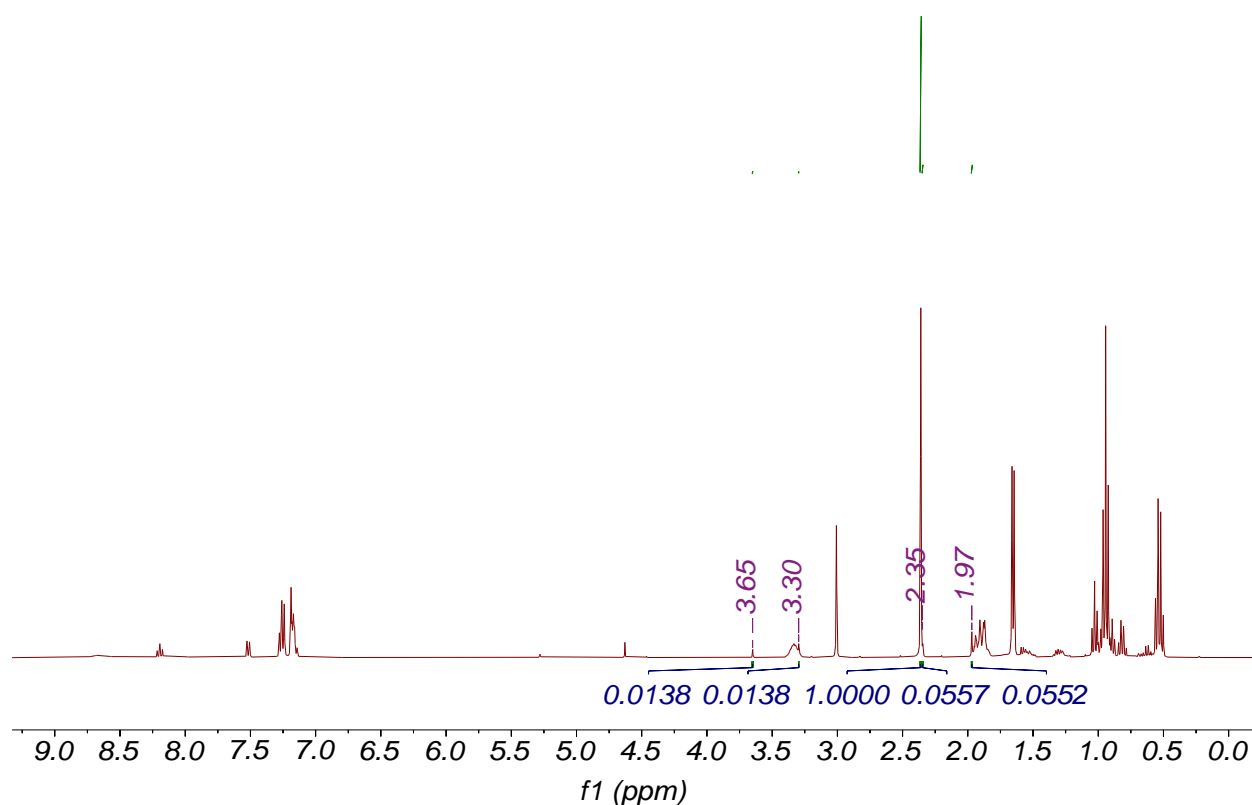

Figure S 29.  $^1\text{H}$  NMR of  $\text{B(C}_6\text{F}_5)_3/2,6\text{-Lutidine/Et}_3\text{Si-I}$ , 40 hours at  $100^\circ\text{C}$ ,  $\text{CDCl}_3$

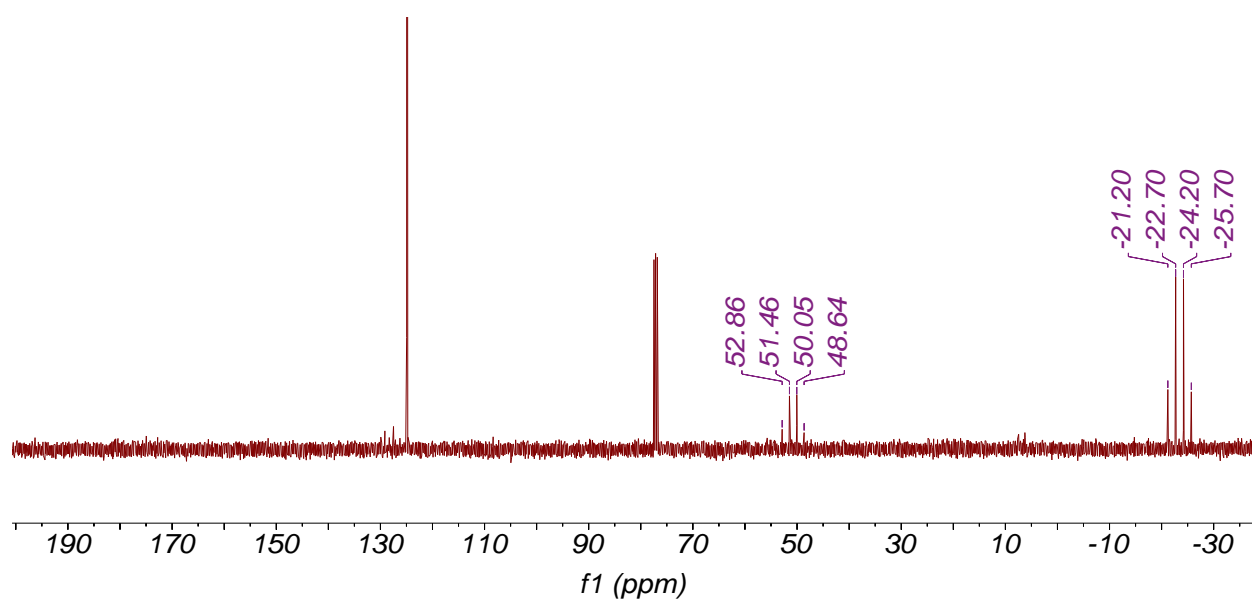

Figure S 30.  $^{13}\text{C}$  NMR of  $\text{B}(\text{C}_6\text{F}_5)_3/2,6\text{-Lutidine}/\text{Et}_3\text{Si-I}$ , 40 hours at  $100^\circ\text{C}$ ,  $\text{CDCl}_3$

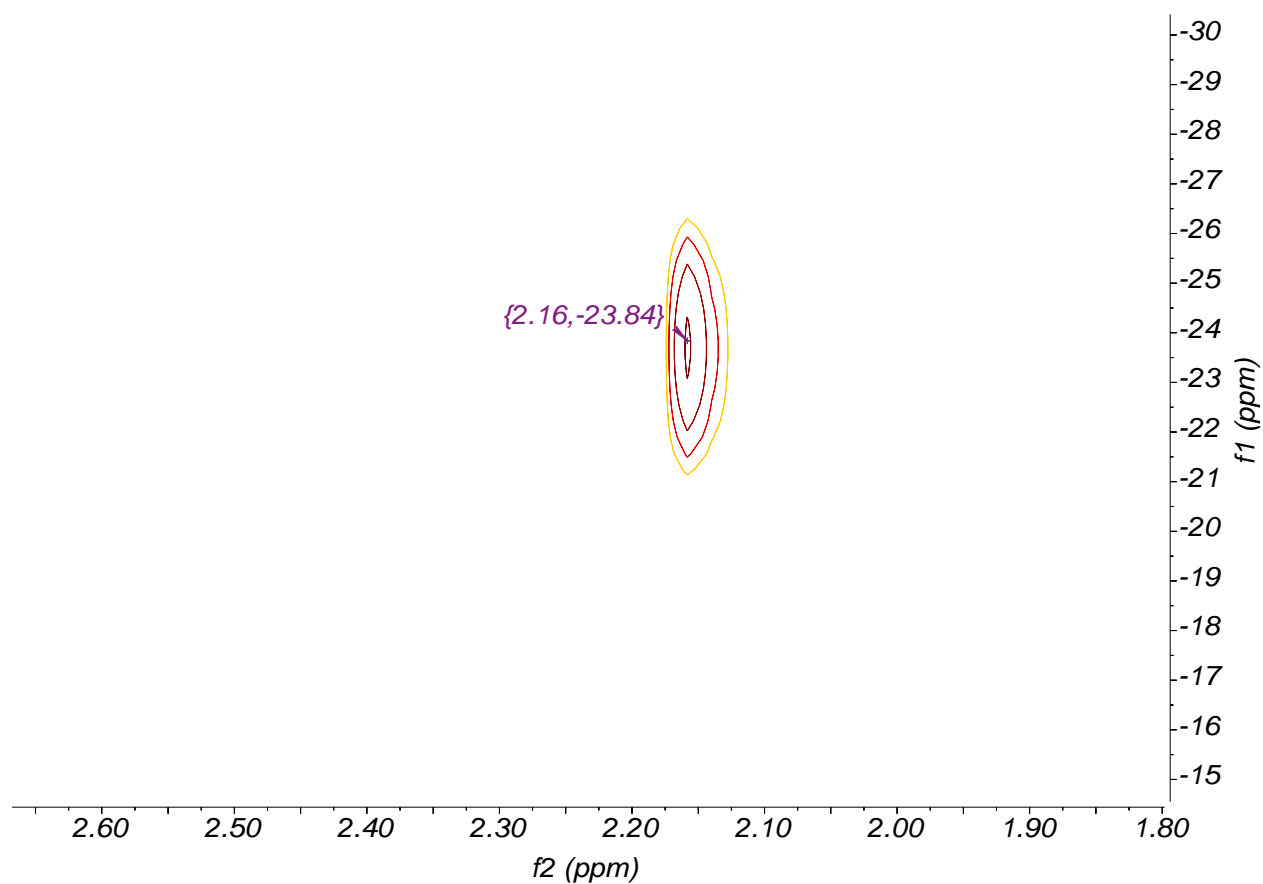

Figure S 31. HSQC spectrum of  $\text{B}(\text{C}_6\text{F}_5)_3/2,6\text{-Lutidine}/\text{Et}_3\text{Si-I}$ , 40 hours at  $100^\circ\text{C}$ ,  $\text{CDCl}_3$

## 6. $\text{B}(\text{C}_6\text{F}_5)_3/2,4,6\text{-Collidine}$ FLP and halosilanes with $\text{H}_2/\text{CO}_2$



Entry 9:  $B(C_6F_5)_3/2,4,6\text{-Collidine}/Et_3Si\text{-I}$  in  $C_6D_6$

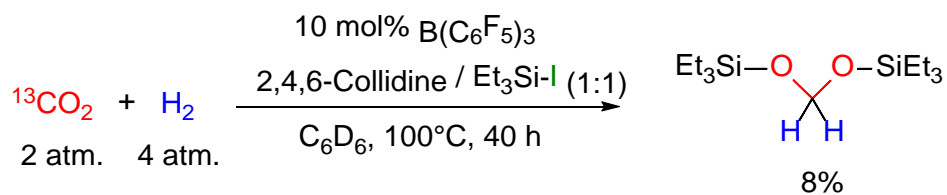

$^1H$  NMR (500 MHz,  $C_6D_6$ )  $\delta$  5.06 (d,  $J = 161.7$  Hz,  $(Et_3SiO)_2^{13}CH_2$ ),

$^{13}C\{^1H\}$  NMR (101 MHz,  $C_6D_6$ )  $\delta$  84.5 ( $(Et_3SiO)_2^{13}CH_2$ ).

Overall yield = 8% at 40 hours;  $(Et_3SiO)_2^{13}CH_2$

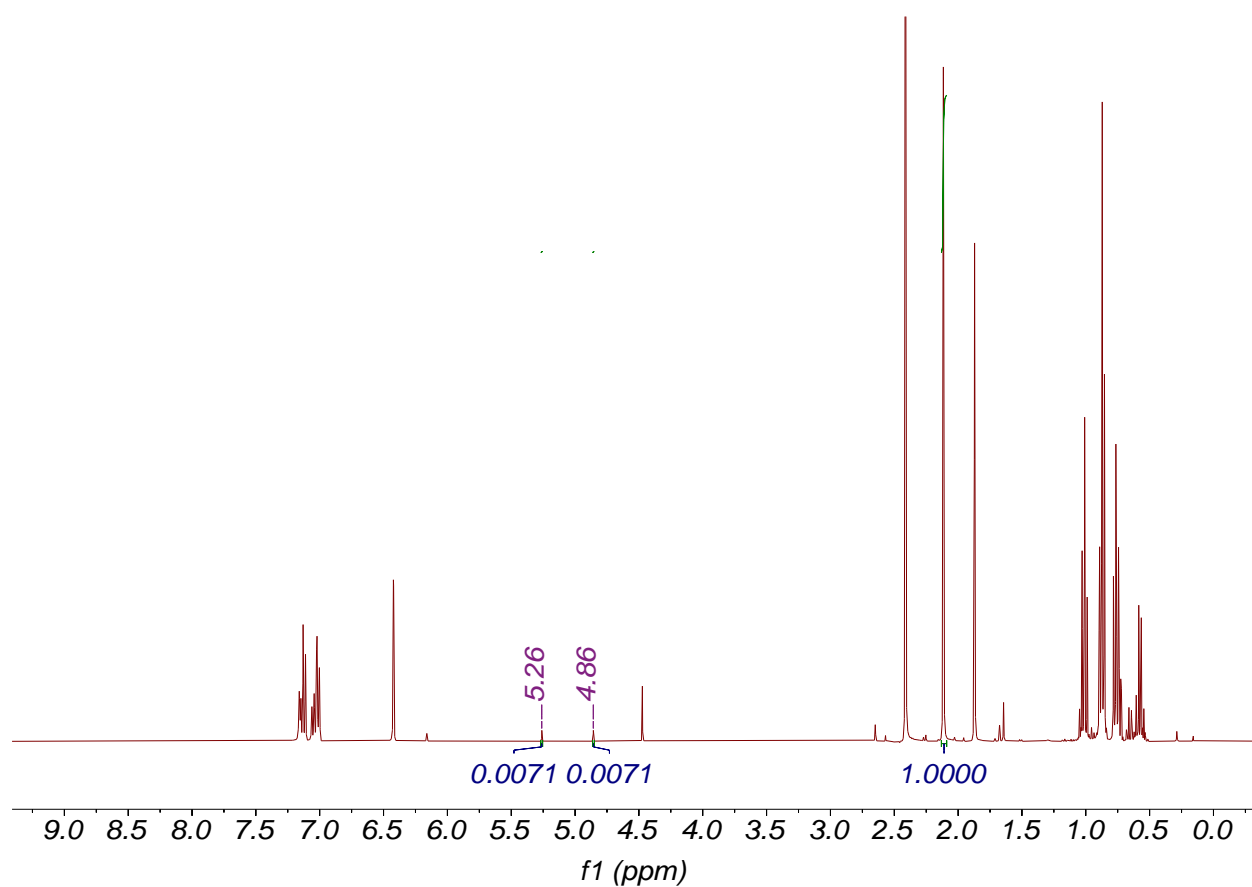

Figure S 32.  $^1H$  NMR of  $B(C_6F_5)_3/2,4,6\text{-Collidine}/Et_3Si\text{-I}$ , 40 hours at  $100^\circ C$ ,  $C_6D_6$

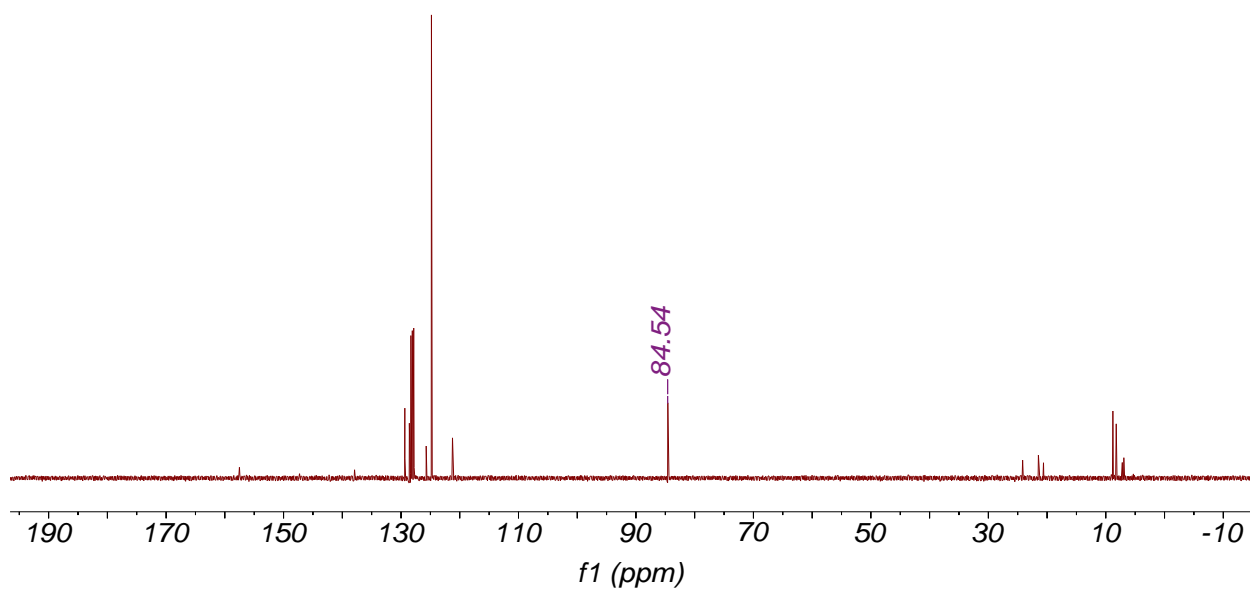

Figure S 33.  $^{13}\text{C}\{^1\text{H}\}$  NMR of  $\text{B}(\text{C}_6\text{F}_5)_3/2,4,6\text{-Collidine}/\text{Et}_3\text{Si-I}$ , 40 hours at  $100^\circ\text{C}$ ,  $\text{C}_6\text{D}_6$

Entry 10:  $\text{B}(\text{C}_6\text{F}_5)_3/2,4,6\text{-Collidine}/\text{Et}_3\text{Si-I}$  in  $\text{CDCl}_3$

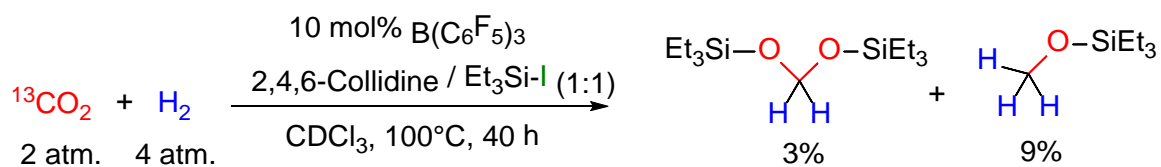

$^1\text{H}$  NMR (400 MHz,  $\text{CDCl}_3$ )  $\delta$  5.06 (d,  $J = 161.6$  Hz,  $(\text{Et}_3\text{SiO})_2^{13}\text{C}\underline{\text{H}}_2$ ), 3.47 (d,  $J = 141.4$  Hz,  $\text{Et}_3\text{SiO}^{13}\text{C}\underline{\text{H}}_3$ ).

$^{13}\text{C}\{^1\text{H}\}$  NMR (101 MHz,  $\text{CDCl}_3$ )  $\delta$  84.2 ( $(\text{Et}_3\text{SiO})_2^{13}\text{C}\underline{\text{H}}_2$ ), 50.6 ( $\text{Et}_3\text{SiO}^{13}\text{C}\underline{\text{H}}_3$ ).

Overall yield = 12% at 40 hours;  $\text{Et}_3\text{SiO}^{13}\text{CH}_3$ :  $(\text{Et}_3\text{SiO})_2^{13}\text{CH}_2 = 3.4:1$ .

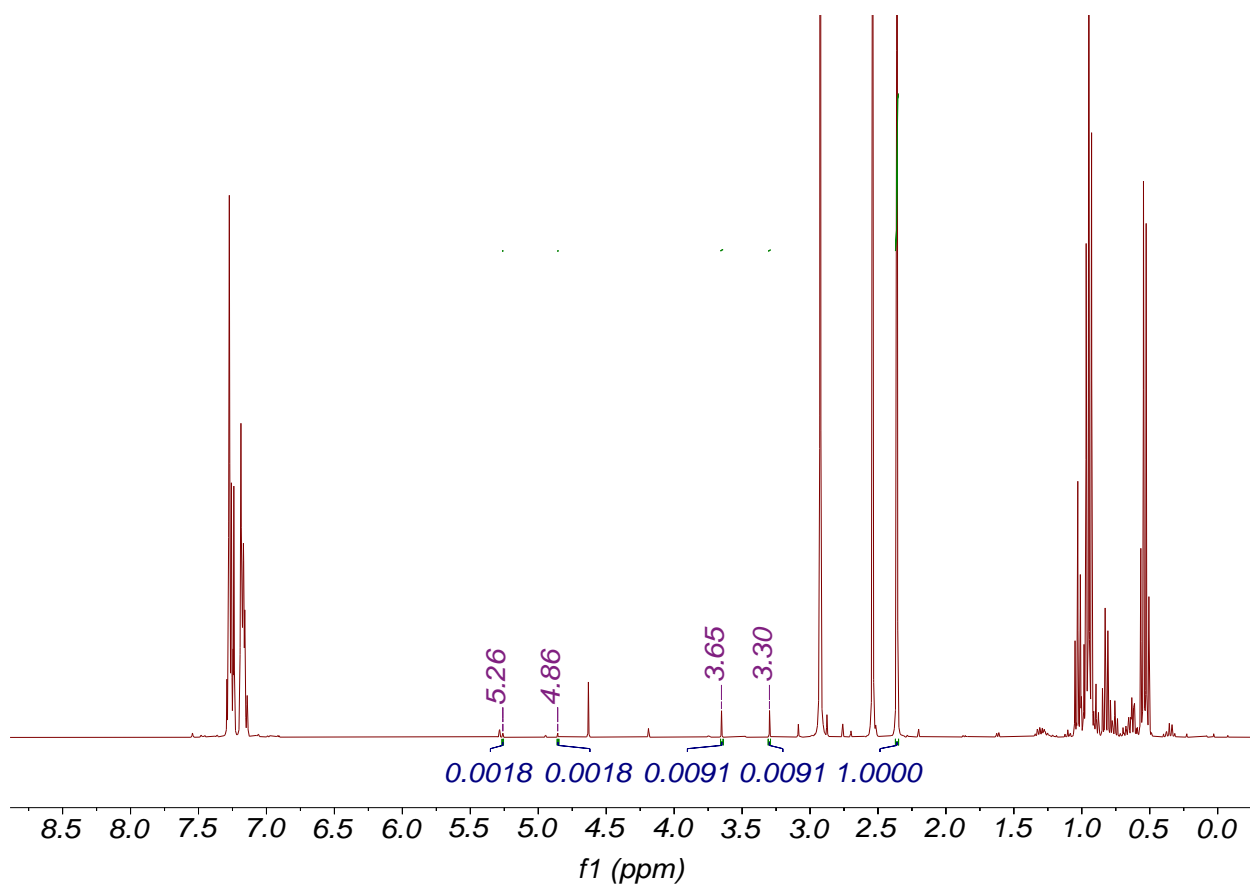

Figure S 34.  $^1\text{H}$  NMR of  $\text{B}(\text{C}_6\text{F}_5)_3/2,4,6\text{-Collidine}/\text{Et}_3\text{Si-I}$ , 40 hours at  $100^\circ\text{C}$ ,  $\text{CDCl}_3$

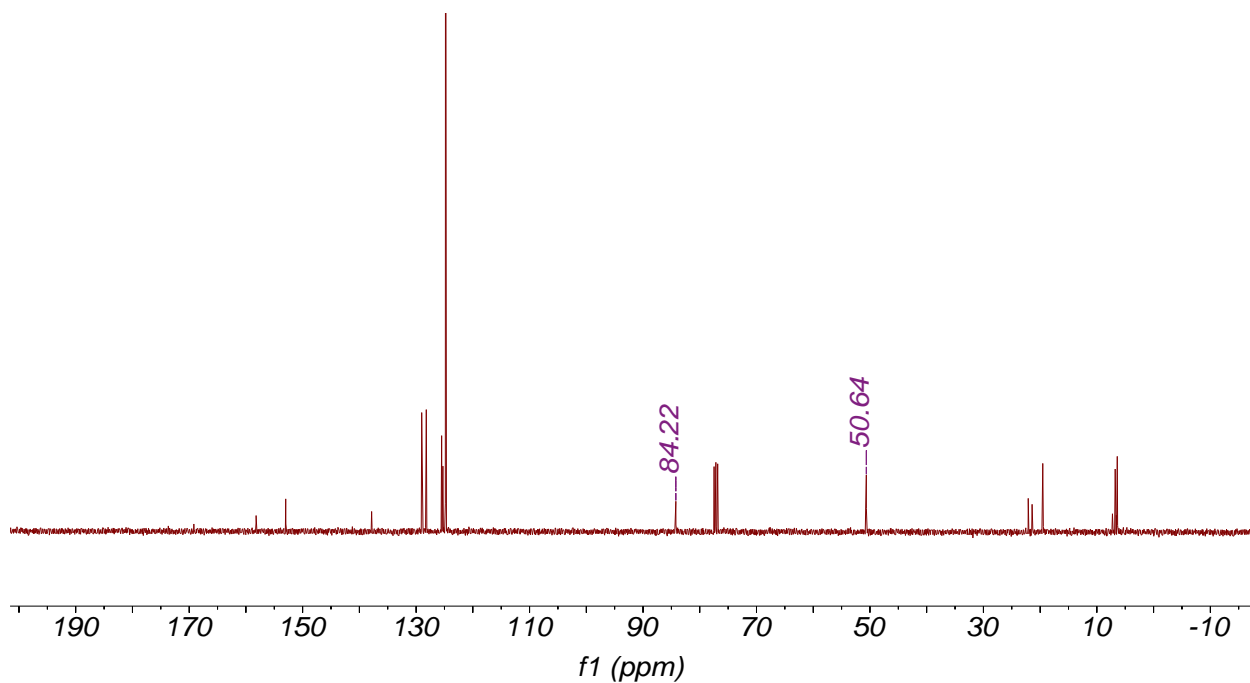

Figure S 35.  $^{13}\text{C}\{^1\text{H}\}$  NMR of  $\text{B}(\text{C}_6\text{F}_5)_3/2,4,6\text{-Collidine}/\text{Et}_3\text{Si-I}$ , 40 hours at  $100^\circ\text{C}$ ,  $\text{CDCl}_3$

## 7. $B(C_6F_5)_3/2,6$ -Lutidine FLP and halosilanes with $D_2/CO_2$

Reaction for 24 hours

10 mol%  $B(C_6F_5)_3$  (2.6 mg, 0.0051 mmol) in 0.4 mL  $CDCl_3$  was transferred to a J-young tube, followed by the addition of  $Et_3Si-I$  (8.9  $\mu$ L, 0.051 mmol, 10 eq), 2,6-lutidine (6.0  $\mu$ L, 0.051 mmol, 10 eq) and 10  $\mu$ L toluene (internal standard). After freeze-pump-thaw degassing, the solution was kept frozen in a liquid nitrogen bath, 2 atm.  $^{13}CO_2$  and 2 atm.  $D_2$  was added to the J-young tube. After warming up back to room temperature, the J-young tube was heated in a 100°C oil bath for 24 hours. 0.8 mg [ $^{13}C$ ]Dipp-urea ( $^{13}C$  enriched 1,3-bis(2,6-diisopropylphenyl)urea (MW = 381.28 g/mol) ) was added from stock solution to the crude reaction mixture as internal standard for yield determination.

Note: H/D scramble at the methyl groups of 2,6-lutidine was observed.<sup>[6]</sup>

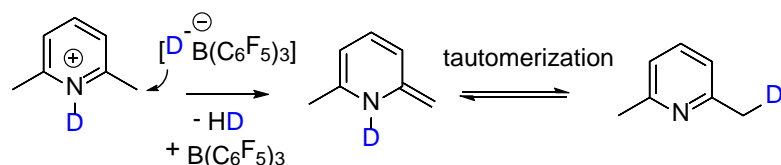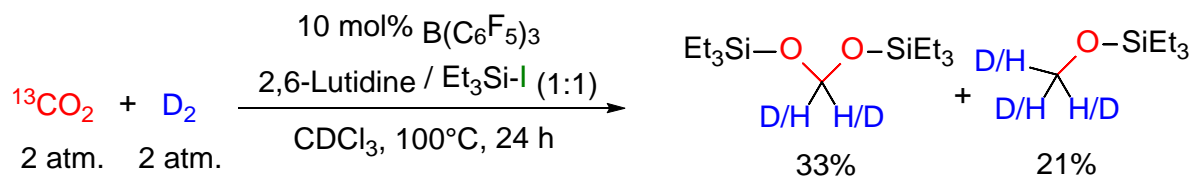

$^{13}C\{^1H\}$  NMR (126 MHz,  $CDCl_3$ )  $\delta$  84.3 (s, 0.68C,  $(Et_3SiO)_2^{13}CH_2$ ), 84.0 (t, 2.64C,  $J = 24.8$  Hz,  $(Et_3SiO)_2^{13}CHD$ ), 83.6 (p, 0.72C,  $J = 24.7$  Hz,  $(Et_3SiO)_2^{13}CD_2$ ), 50.8 (s, 0.14C,  $Et_3SiO^{13}CH_3$ ), 50.5 (t, 0.75C,  $J = 21.7$  Hz,  $Et_3SiO^{13}CH_2D$ ), 50.2 (p, 1.11C,  $J = 21.7$  Hz,  $Et_3SiO^{13}CHD_2$ ), 49.7 (sept, 0.54C,  $J = 21.6$  Hz,  $Et_3SiO^{13}CD_3$ ).

Overall yield = 54% at 24 hours, acetal: methoxy = 1.6 : 1

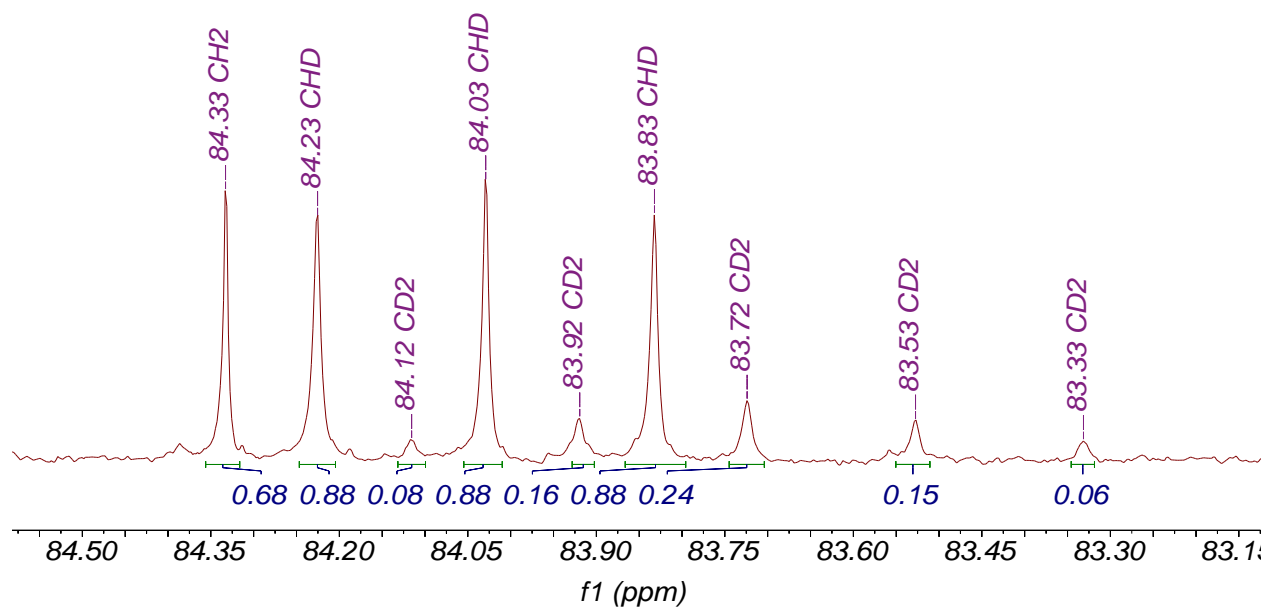

Figure S 36.  $^{13}\text{C}\{^1\text{H}\}$  NMR spectrum, acetal species region, 24 hours at  $100^\circ\text{C}$ ,  $\text{CDCl}_3$

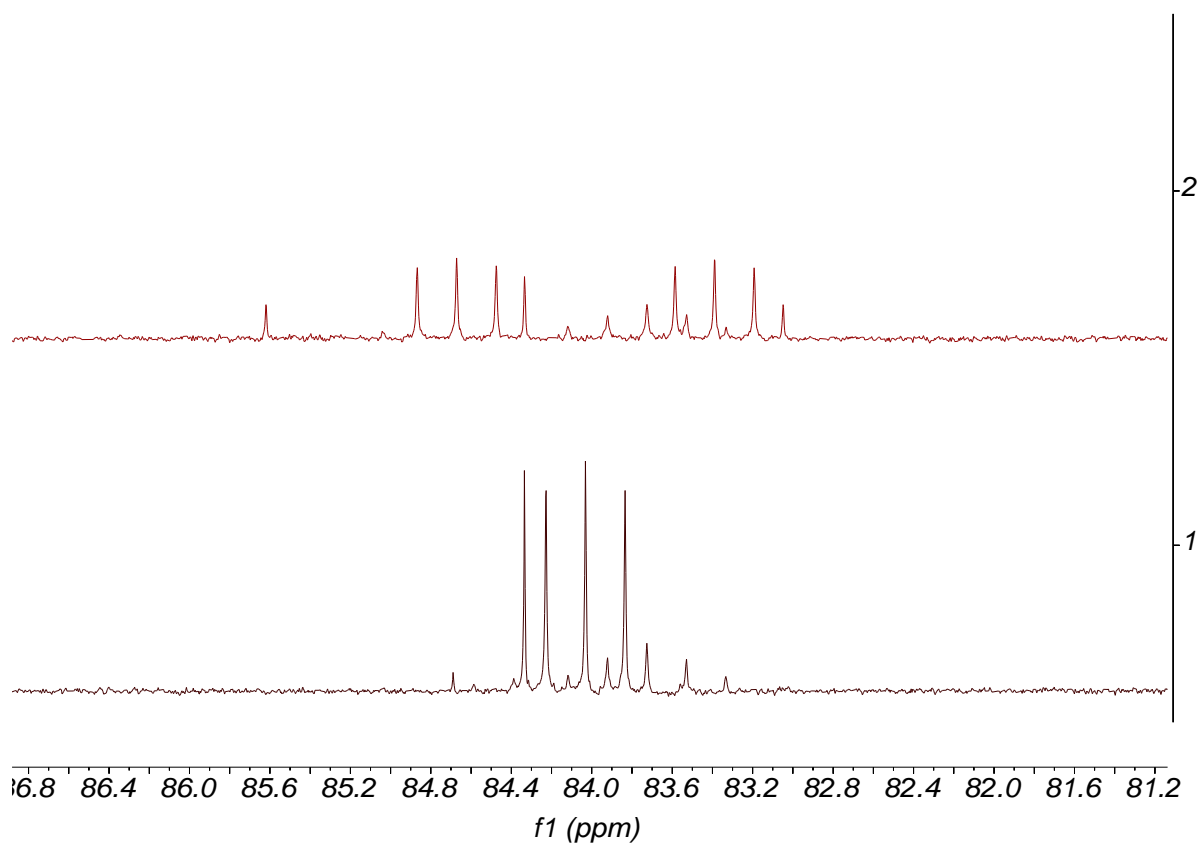

Figure S 37.  $^{13}\text{C}\{^1\text{H}\}$  NMR (bottom) and  $^{13}\text{C}$  NMR (top) spectra, acetal species region, 24 hours at  $100^\circ\text{C}$ ,  $\text{CDCl}_3$

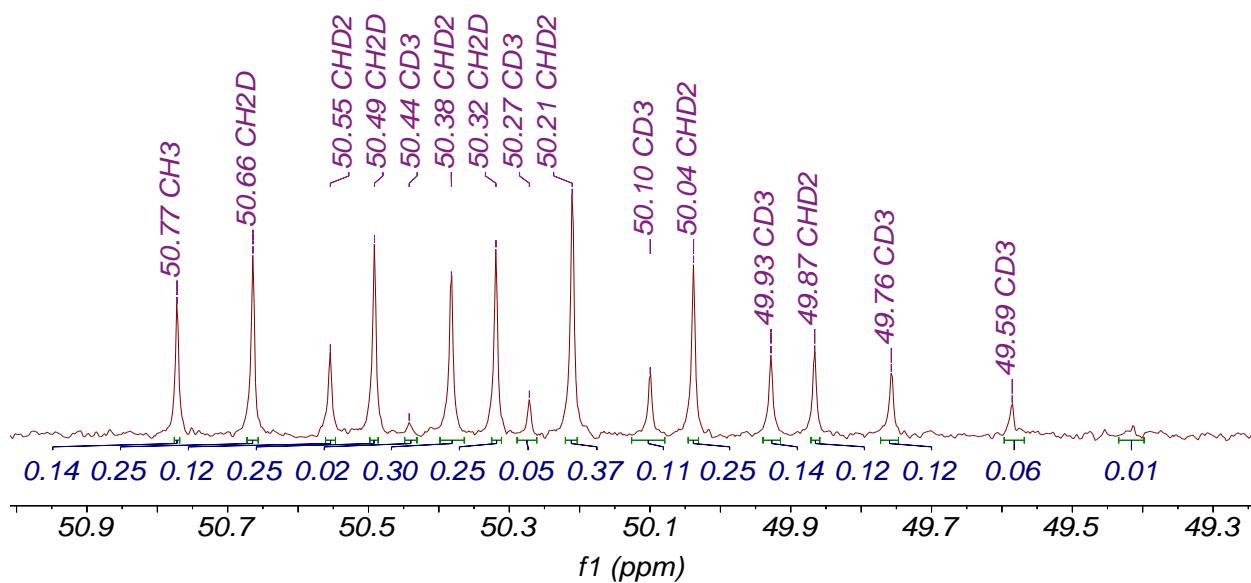

Figure S 38.  $^{13}\text{C}\{^1\text{H}\}$  NMR spectrum, methoxy species region, 24 hours at  $100^\circ\text{C}$ ,  $\text{CDCl}_3$

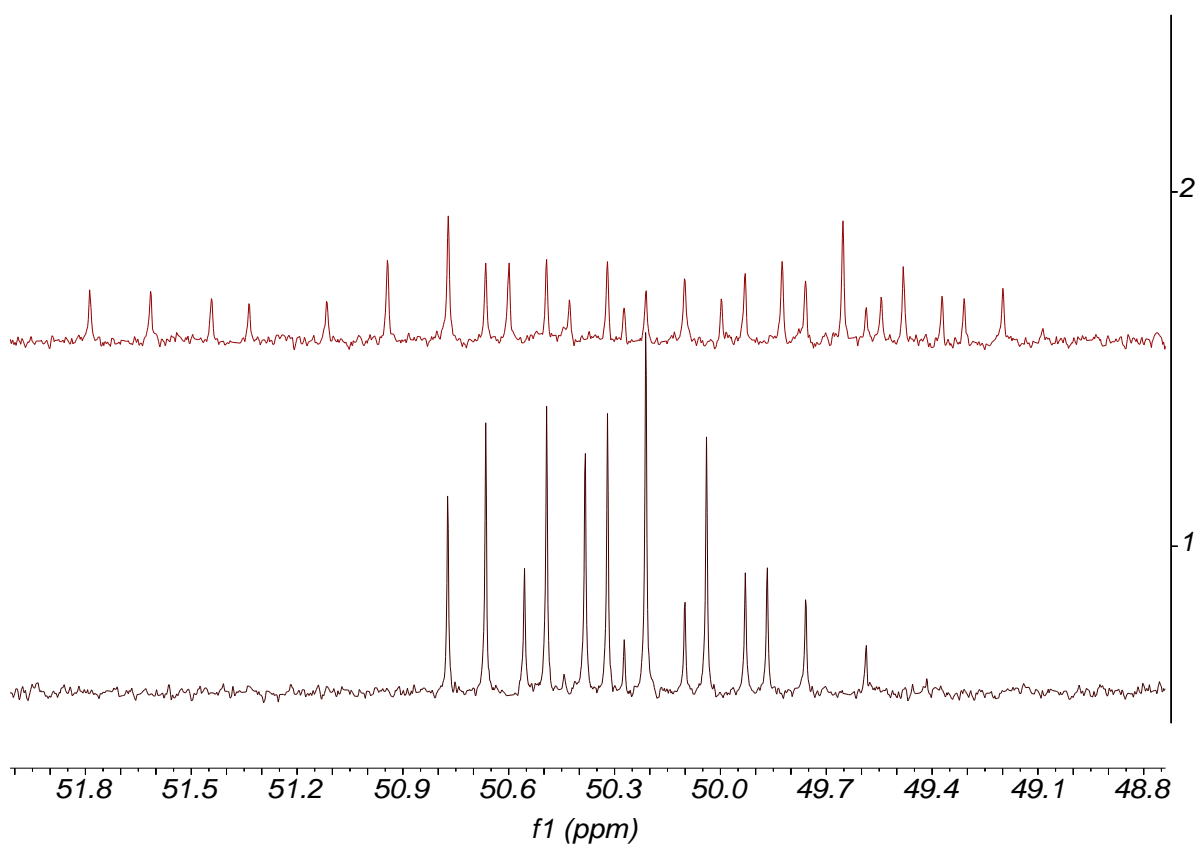

Figure S 39.  $^{13}\text{C}\{^1\text{H}\}$  NMR (bottom) and  $^{13}\text{C}$  NMR (top) spectra, methoxy species region, 24 hours at  $100^\circ\text{C}$ ,  $\text{CDCl}_3$

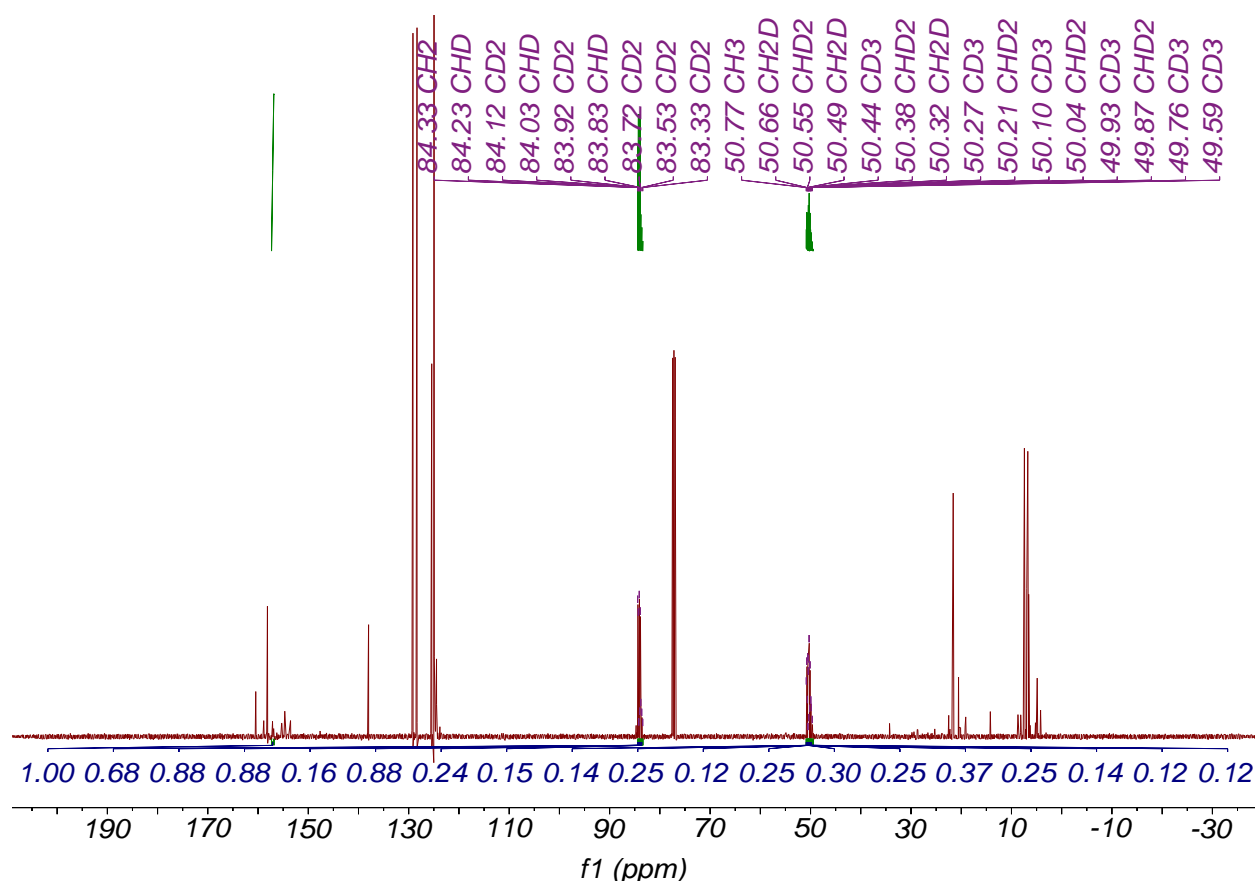

Figure S 40.  $^{13}\text{C}\{^1\text{H}\}$  NMR spectrum of  $\text{B}(\text{C}_6\text{F}_5)_3/2,6\text{-Lutidine}/\text{Et}_3\text{Si-I}$ , 20 hours at  $100^\circ\text{C}$ , internal standard added,  $\text{CDCl}_3$

#### Reaction for 70 hours

10 mol%  $\text{B}(\text{C}_6\text{F}_5)_3$  (2.6 mg, 0.0051 mmol) in 0.4 mL  $\text{CDCl}_3$  was transferred to a J-young tube, followed by the addition of  $\text{Et}_3\text{Si-I}$  (8.9  $\mu\text{L}$ , 0.051 mmol, 10 eq), 2,6-lutidine (6.0  $\mu\text{L}$ , 0.051 mmol, 10 eq) and 10  $\mu\text{L}$  toluene (internal standard). After freeze-pump-thaw degassing, the solution was kept frozen in a liquid nitrogen bath, 2 atm.  $^{13}\text{CO}_2$  and 2 atm.  $\text{D}_2$  was added to the J-young tube. After warming up back to room temperature, the J-young tube was heated in a  $100^\circ\text{C}$  oil bath for 70 hours. 5.2 mg [ $^{13}\text{C}$ ]Dipp-urea ( $^{13}\text{C}$  enriched 1,3-bis(2,6-diisopropylphenyl)urea (MW = 381.28 g/mol) ) was added to the crude reaction mixture as internal standard for yield determination.

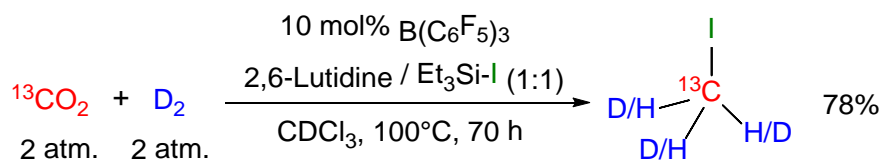

$^{13}\text{C}\{^1\text{H}\}$  NMR (126 MHz,  $\text{CDCl}_3$ )  $\delta$  -23.39 (s, 1C,  $^{13}\text{CH}_3\text{I}$ ), -23.41 (t, 4.74C,  $J = 23.4$  Hz,  $^{13}\text{CDH}_2\text{I}$ ), -23.44 (p, 4.65C,  $J = 23.2$  Hz,  $^{13}\text{CD}_2\text{HI}$ ), -23.47 (septet, 3.62C,  $J = 23.1$  Hz,  $^{13}\text{CD}_3\text{I}$ ).

Overall yield = 78% at 70 hours, iodomethane only

The total integration of each isotopologues is derived from the integration of their central resonance based on the 1:1:1 ratio of the triplet resonance of  $^{13}\text{CDH}_2$ ; 1:2:3:2:1 ratio of the pentet resonance of  $^{13}\text{CD}_2\text{HI}$  and the 1:3:6:7:6:3:1 ratio of the septet resonance of  $^{13}\text{CD}_3$ .

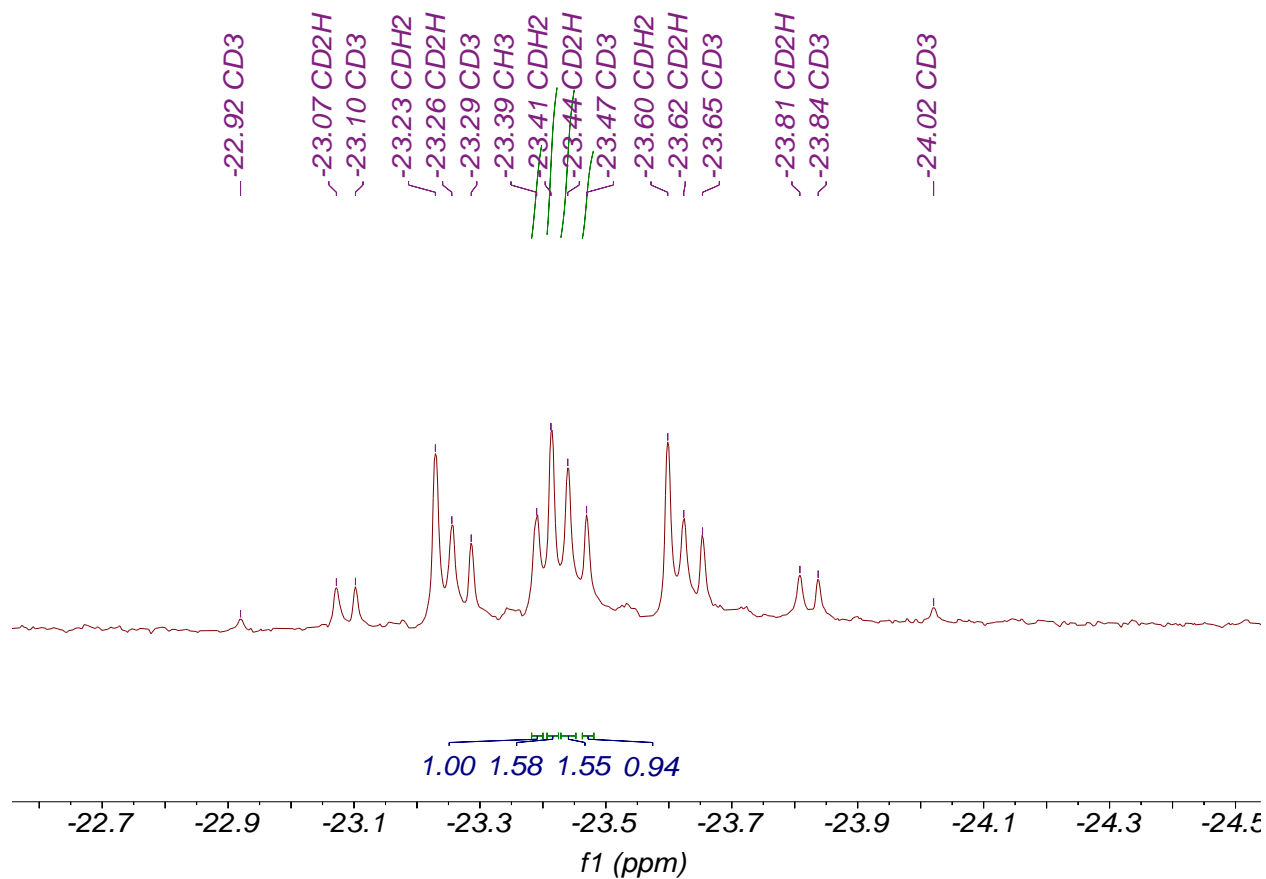

Figure S 41.  $^{13}\text{C}\{^1\text{H}\}$  NMR spectrum, iodomethane region, 70 hours at  $100^\circ\text{C}$ ,  $\text{CDCl}_3$



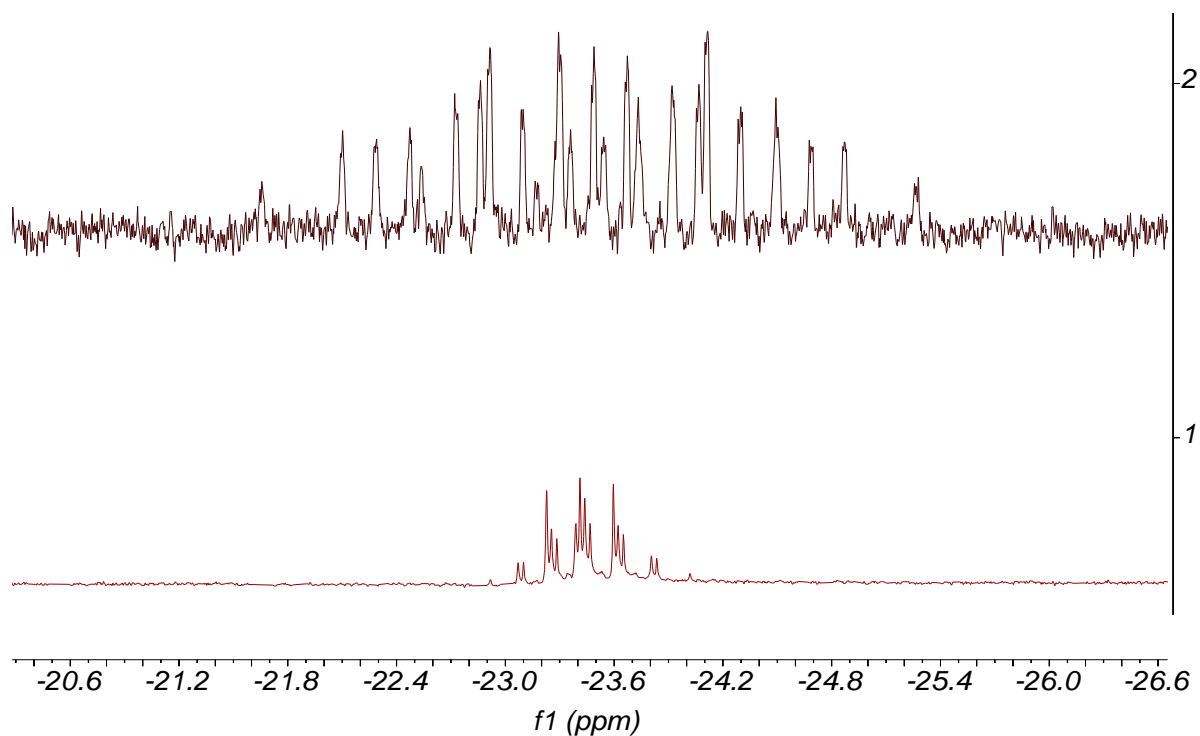

Figure S 42.  $^{13}\text{C}\{^1\text{H}\}$  NMR (bottom) and  $^{13}\text{C}$  NMR (top) spectra, iodomethane region, 70 hours at  $100^\circ\text{C}$ ,  $\text{CDCl}_3$

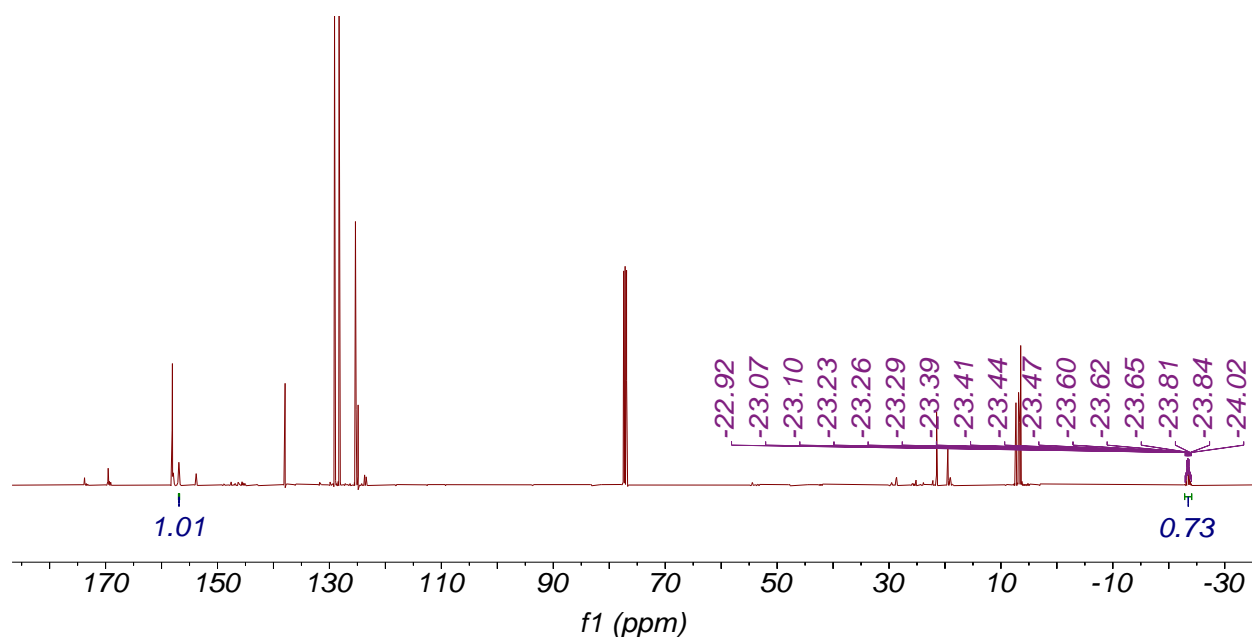

Figure S 43.  $^{13}\text{C}\{^1\text{H}\}$  NMR spectrum of  $\text{B}(\text{C}_6\text{F}_5)_3/2,6\text{-Lutidine}/\text{Et}_3\text{Si-I}$ , 70 hours at  $100^\circ\text{C}$ , internal standard added,  $\text{CDCl}_3$

## 8. Experimental References

- [1] S. D. Tran, T. A. Tronic, W. Kaminsky, D. Michael Heinekey, J. M. Mayer, *Inorganica Chimica Acta* **2011**, 369, 126-132.
- [2] J. Chen, L. Falivene, L. Caporaso, L. Cavallo, E. Y. X. Chen, *Journal of the American Chemical Society* **2016**, 138, 5321-5333.

- [3] aC. Altona, J. H. Ippel, A. J. A. W. Hoekzema, C. Erkelens, M. Groesbeek, L. A. Donders, *Magnetic Resonance in Chemistry* **1989**, *27*, 564-576; bJ. John, E. Gravel, A. Hagège, H. Li, T. Gacoin, E. Doris, *Angewandte Chemie International Edition* **2011**, *50*, 7533-7536; cM. Ahrens, G. Scholz, T. Braun, E. Kemnitz, *Angewandte Chemie International Edition* **2013**, *52*, 5328-5332.
- [4] T. Mahdi, J. N. del Castillo, D. W. Stephan, *Organometallics* **2013**, *32*, 1971-1978.
- [5] N. A. Darwish, K. A. M. Gasem, R. L. Robinson, Jr., *Journal of Chemical & Engineering Data* **1994**, *39*, 781-784.
- [6] X. Zhang, L. Wang, Q. Wang, F. Ge, X. Wang, *ChemistrySelect* **2019**, *4*, 8655-8660.

## 9. DFT computational Details:

The quantum chemical DFT calculations have been performed with the TURBOMOLE 7.4 suite of programs<sup>1</sup> The structures are fully optimized at the TPSS-D3/def2-TZVP + COSMO level of theory, which combines the TPSS meta-GGA density functional<sup>2</sup> with the BJ-damped DFT-D3 dispersion correction<sup>3, 4</sup> and the def2-TZVP basis set,<sup>5, 6</sup> using the Conductor-like Screening Model (COSMO) continuum solvation model<sup>7</sup> for CHCl<sub>3</sub> solvent (dielectric constant  $\epsilon = 4.8$  and solvent diameter  $R_{\text{solv}} = 3.17$  Å). The density-fitting RI-J approach<sup>5, 8, 9</sup> is used to accelerate the geometry optimization and numerical harmonic frequency calculations<sup>10</sup> in solution. The optimized structures are characterized by frequency analysis to identify the nature of located stationary points (no imaginary frequency for true minima and only one imaginary frequency for transition state) and to provide thermal corrections (at 298.15 K and 1 atm) according to the modified ideal gas–rigid rotor–harmonic oscillator model.<sup>11</sup> This choice of dispersion-corrected meta-GGA functional makes the efficient exploration of all potential reaction paths possible.

The final solvation free energies in CHCl<sub>3</sub> are computed with the COSMO-RS solvation model<sup>12</sup> (parameter file: BP\_TZVP\_C30\_1601.ctd) using the COSMOtherm program package<sup>13</sup> on the above TPSS-D3 optimized structures, and corrected by +1.89 kcal·mol<sup>-1</sup> to account for higher reference solute concentration of 1 mol·L<sup>-1</sup> usually used in solution. To check the effects of the chosen DFT functional on the reaction energies and barriers, single-point calculations at the meta-GGA TPSS-D3<sup>2</sup> and hybrid-meta-GGA PW6B95-D3<sup>14</sup> levels are performed using a larger def2-QZVP basis set.<sup>6, 15</sup> The final reaction Gibbs free energies ( $\Delta G$ ) are determined from the electronic single-point energies plus TPSS-D3 thermal corrections and COSMO-RS solvation free energies. The computed relative free energies from both DFT functionals are mostly in very good overall agreement of  $0.1 \pm 2.2$  kcal/mol (average  $\pm$  standard deviations), while as can be expected, about  $2.8 \pm 2.2$  kcal/mol (average  $\pm$  standard deviations) higher reaction barriers are observed at the PW6B95-D3 level. In our discussion, higher-level PW6B95-D3 Gibbs free energies (in kcal/mol, at 298.15 K and 1 mol/L concentration) will be used in our discussion unless specified otherwise. The applied DFT methods in combination with the large AO basis set provide usually accurate electronic energies leading to errors for chemical energies (including barriers) on the order of typically 1-2 kcal/mol. This has been tested thoroughly for the huge data base GMTKN55<sup>16</sup> which is the common standard in the field of DFT benchmarking.

**Table S1.** TPSS-D3/def2-TZVP + COSMO computed imaginary frequency (ImF), zero-point energies (ZPE), gas-phase enthalpic (Hc) and Gibbs free-energy (Gc) corrections; the COSMO-RS computed solvation enthalpic (Hsol) and Gibbs free-energy (Gsol) corrections in THF solution; TPSS-D3/def2-QZVP and PW6B95-D3/def2-QZVP single-point energies (TPSS-D3 and PW6B95-D3); the total PW6B95-D3 free energies GP; the relative electronic energies ( $\Delta E_T$  and  $\Delta E_P$ ) and Gibbs free-energies ( $\Delta G_T$  and  $\Delta G_P$ ) at the TPSS-D3 and PW6B95-D3 levels.

| Reactions<br>in CHCl <sub>3</sub> solution                                                                                                                                                                                          | Im<br>cm <sup>-1</sup> | ZPE<br>kcal | Hc<br>kcal | Gc<br>kcal | Hsol<br>kcal | Gsol<br>kcal | TPSS-D3<br>E <sub>h</sub> | PW6B95-D3<br>E <sub>h</sub> | G <sub>P</sub><br>E <sub>h</sub> | $\Delta E_T$<br>kcal | $\Delta E_P$<br>kcal | $\Delta G_P$<br>kcal | $\Delta G_T$<br>kcal |
|-------------------------------------------------------------------------------------------------------------------------------------------------------------------------------------------------------------------------------------|------------------------|-------------|------------|------------|--------------|--------------|---------------------------|-----------------------------|----------------------------------|----------------------|----------------------|----------------------|----------------------|
| <i>Reaction of CO<sub>2</sub> with separated FLP of Lutidine (Lut) and B(C<sub>6</sub>F<sub>5</sub>)<sub>3</sub> is 11.5 kcal/mol endergonic, thus thermodynamically not favorable.</i>                                             |                        |             |            |            |              |              |                           |                             |                                  |                      |                      |                      |                      |
| Lut + B(C <sub>6</sub> F <sub>5</sub> ) <sub>3</sub> + CO <sub>2</sub>                                                                                                                                                              | 0                      | 191.46      | 217.36     | 126.20     | -31.12       | -19.87       | -2725.46662               | -2728.25847                 | -2728.07999                      | 0.00                 | 0.00                 | 0.00                 | 0.00                 |
| LutCOOB(C <sub>6</sub> F <sub>5</sub> ) <sub>3</sub>                                                                                                                                                                                | 0                      | 194.14      | 219.60     | 154.11     | -28.95       | -22.89       | -2725.47922               | -2728.27381                 | -2728.06170                      | -7.91                | -9.63                | 11.47                | 13.19                |
| <i>Nucleophilic replacement of Lutidine with SiMe<sub>3</sub>I is 5.1 kcal/mol endergonic to release iodide anion.</i>                                                                                                              |                        |             |            |            |              |              |                           |                             |                                  |                      |                      |                      |                      |
| SiMe <sub>3</sub> I + Lut                                                                                                                                                                                                           | 0                      | 159.64      | 170.43     | 120.40     | -23.53       | -13.58       | -1034.18866               | -1035.19635                 | -1035.02010                      | 0.00                 | 0.00                 | 0.00                 | 0.00                 |
| LutSiMe <sub>3</sub> <sup>+</sup> + I <sup>-</sup>                                                                                                                                                                                  | 0                      | 162.28      | 172.91     | 128.18     | -140.66      | -111.92      | -1034.03690               | -1035.04390                 | -1035.01197                      | 95.23                | 95.66                | 5.11                 | 4.68                 |
| <i>H<sub>2</sub> activation with the Lut.B(C<sub>6</sub>F<sub>5</sub>)<sub>3</sub> adduct is facile to form reductive hydroborate salt [LutH][HB(C<sub>6</sub>F<sub>5</sub>)<sub>3</sub>] (A)</i>                                   |                        |             |            |            |              |              |                           |                             |                                  |                      |                      |                      |                      |
| H <sub>2</sub> + Lut.B(C <sub>6</sub> F <sub>5</sub> ) <sub>3</sub>                                                                                                                                                                 | 0                      | 192.29      | 217.85     | 146.91     | -23.51       | -17.21       | -2537.96701               | -2540.56719                 | -2540.35448                      | 0.00                 | 0.00                 | 0.00                 | 0.00                 |
| Lut + H <sub>2</sub> + B(C <sub>6</sub> F <sub>5</sub> ) <sub>3</sub>                                                                                                                                                               | 0                      | 190.63      | 216.37     | 131.15     | -28.74       | -18.09       | -2537.94178               | -2540.54054                 | -2540.35132                      | 15.83                | 16.73                | 1.99                 | 1.09                 |
| <b>TS1</b>                                                                                                                                                                                                                          | 47i                    | 193.52      | 218.62     | 152.58     | -21.10       | -16.52       | -2537.94828               | -2540.54577                 | -2540.32593                      | 11.75                | 13.44                | 17.91                | 16.23                |
| HB(C <sub>6</sub> F <sub>5</sub> ) <sub>3</sub> <sup>-</sup> + LutH <sup>+</sup>                                                                                                                                                    | 0                      | 198.18      | 222.26     | 144.72     | -95.92       | -87.47       | -2537.86104               | -2540.46277                 | -2540.36550                      | -9.30                | -9.65                | -8.01                | -7.65                |
| <b>A</b>                                                                                                                                                                                                                            | 0                      | 198.08      | 222.91     | 157.79     | -29.89       | -24.55       | -2537.98183               | -2540.58258                 | -2540.36724                      | 66.49                | 65.53                | -6.91                | -5.95                |
| <i>..forming salt [LutH][B(C<sub>6</sub>F<sub>5</sub>)<sub>3</sub>OCHO] (B) after CO<sub>2</sub> addition</i>                                                                                                                       |                        |             |            |            |              |              |                           |                             |                                  |                      |                      |                      |                      |
| <b>A</b> + CO <sub>2</sub>                                                                                                                                                                                                          | 0                      | 205.24      | 232.31     | 151.96     | -32.93       | -25.26       | -2726.68726               | -2729.47646                 | -2729.26852                      | 0.00                 | 0.00                 | 0.00                 | 0.00                 |
| <b>A.CO<sub>2</sub></b>                                                                                                                                                                                                             | 0                      | 204.92      | 232.92     | 160.75     | -33.94       | -28.28       | -2726.68327               | -2729.47488                 | -2729.26076                      | 2.50                 | 0.99                 | 4.87                 | 6.38                 |
| <b>TS2</b>                                                                                                                                                                                                                          | 254i                   | 202.93      | 230.40     | 159.14     | -31.80       | -25.64       | -2726.67019               | -2729.45413                 | -2729.23836                      | 10.71                | 14.01                | 18.92                | 15.62                |
| <b>B</b> <sup>-</sup> + LutH <sup>+</sup>                                                                                                                                                                                           | 0                      | 207.35      | 233.35     | 151.74     | -106.97      | -92.42       | -2726.57938               | -2729.37392                 | -2729.27336                      | 67.70                | 64.34                | -3.04                | 0.31                 |
| <b>B</b>                                                                                                                                                                                                                            | 0                      | 206.94      | 233.96     | 164.54     | -31.69       | -24.32       | -2726.70895               | -2729.50336                 | -2729.27688                      | -13.61               | -16.88               | -5.25                | -1.98                |
| <i>With more basic 2,4,6-collidine (Col), H<sub>2</sub> activation with the Col.B(C<sub>6</sub>F<sub>5</sub>)<sub>3</sub> adduct is 1.0 kcal/mol more favorable to form [ColH][HB(C<sub>6</sub>F<sub>5</sub>)<sub>3</sub>] (cA)</i> |                        |             |            |            |              |              |                           |                             |                                  |                      |                      |                      |                      |
| Col.B(C <sub>6</sub> F <sub>5</sub> ) <sub>3</sub> + H <sub>2</sub>                                                                                                                                                                 | 0                      | 208.82      | 235.76     | 161.97     | -24.59       | -18.02       | -2577.31441               | -2579.95651                 | -2579.72109                      | 0.00                 | 0.00                 | 0.00                 | 0.00                 |
| B(C <sub>6</sub> F <sub>5</sub> ) <sub>3</sub> + Col + H <sub>2</sub>                                                                                                                                                               | 0                      | 208.13      | 234.67     | 147.34     | -30.12       | -18.99       | -2577.28672               | -2579.92716                 | -2579.71358                      | 17.37                | 18.42                | 4.71                 | 3.66                 |
| <b>cTS1</b>                                                                                                                                                                                                                         | 80i                    | 208.89      | 235.34     | 166.83     | -21.90       | -17.02       | -2577.29670               | -2579.93590                 | -2579.69414                      | 11.11                | 12.93                | 16.91                | 15.08                |
| <b>cA</b>                                                                                                                                                                                                                           | 0                      | 215.15      | 241.02     | 173.79     | -30.77       | -25.19       | -2577.32989               | -2579.97247                 | -2579.73265                      | -9.71                | -10.01               | -7.25                | -6.95                |
| ColH <sup>+</sup> + A <sup>-</sup>                                                                                                                                                                                                  | 0                      | 215.65      | 240.55     | 160.87     | -95.09       | -86.41       | -2577.21183               | -2579.85540                 | -2579.73072                      | 64.37                | 63.45                | -6.04                | -5.12                |

..followed by kinetically less favorable CO<sub>2</sub> reduction with hydroborate cA.

|                                    |   |        |        |        |         |        |             |             |             |        |        |       |       |
|------------------------------------|---|--------|--------|--------|---------|--------|-------------|-------------|-------------|--------|--------|-------|-------|
| cA + CO <sub>2</sub>               | 0 | 222.31 | 250.42 | 167.97 | -33.81  | -25.90 | -2766.03531 | -2768.86634 | -2768.63392 | 0.00   | 0.00   | 0.00  | 0.00  |
| cTS2                               | 0 | 220.74 | 249.45 | 176.02 | -32.92  | -26.03 | -2766.01840 | -2768.84434 | -2768.60231 | 10.62  | 13.81  | 19.84 | 16.65 |
| cB                                 | 0 | 224.19 | 252.12 | 181.07 | -32.44  | -24.81 | -2766.05679 | -2768.89293 | -2768.64090 | -13.48 | -16.68 | -4.38 | -1.17 |
| ColH <sup>+</sup> + B <sup>-</sup> | 0 | 224.82 | 251.63 | 167.89 | -106.14 | -91.37 | -2765.93016 | -2768.76655 | -2768.63858 | 65.98  | 62.62  | -2.92 | 0.44  |

Silane SiMe<sub>3</sub>H formation via the reduction of SiMe<sub>3</sub>I with [LutH][HB(C<sub>6</sub>F<sub>5</sub>)<sub>3</sub>] salt is 10.1 kcal/mol endergonic thus unlikely.

|                                                                              |   |        |        |        |        |        |             |             |             |       |       |       |       |
|------------------------------------------------------------------------------|---|--------|--------|--------|--------|--------|-------------|-------------|-------------|-------|-------|-------|-------|
| A + SiMe <sub>3</sub> I                                                      | 0 | 267.96 | 298.63 | 207.26 | -40.06 | -30.45 | -3245.03164 | -3248.28837 | -3248.00057 | 0.00  | 0.00  | 0.00  | 0.00  |
| LutH <sup>+</sup> .ISiMe <sub>3</sub> .A <sup>-</sup>                        | 0 | 269.57 | 300.64 | 223.33 | -42.20 | -34.40 | -3245.02633 | -3248.28414 | -3247.98005 | 3.33  | 2.65  | 12.87 | 13.55 |
| LutHI.SiMe <sub>3</sub> H.B(C <sub>6</sub> F <sub>5</sub> ) <sub>3</sub>     | 0 | 268.32 | 299.51 | 221.14 | -45.67 | -32.71 | -3245.02178 | -3248.27615 | -3247.97286 | 6.18  | 7.67  | 17.39 | 15.91 |
| LutHI + SiMe <sub>3</sub> H + B(C <sub>6</sub> F <sub>5</sub> ) <sub>3</sub> | 0 | 267.92 | 297.67 | 195.00 | -59.89 | -40.43 | -3244.98693 | -3248.23989 | -3247.98453 | 28.05 | 30.42 | 10.07 | 7.70  |

Facile nucleophilic replacement of Bf<sub>3</sub>OCHO<sup>-</sup> anion with SiMe<sub>3</sub>I to form adduct C and salt LutHI

|                                                         |     |        |        |        |         |        |             |             |             |       |       |       |       |
|---------------------------------------------------------|-----|--------|--------|--------|---------|--------|-------------|-------------|-------------|-------|-------|-------|-------|
| B + SiMe <sub>3</sub> I                                 | 0   | 276.82 | 309.68 | 214.02 | -41.86  | -30.22 | -3433.75876 | -3437.20915 | -3436.91021 | 0.00  | 0.00  | 0.00  | 0.00  |
| B <sup>-</sup> .SiMe <sub>3</sub> I + LutH <sup>+</sup> | 0   | 277.78 | 310.54 | 214.59 | -107.33 | -92.82 | -3433.64372 | -3437.09493 | -3436.89486 | 72.19 | 71.67 | 9.64  | 10.15 |
| TS3 <sup>-</sup>                                        | 46i | 277.57 | 310.01 | 214.57 | -104.32 | -91.32 | -3433.64093 | -3437.08991 | -3436.88748 | 73.94 | 74.82 | 14.27 | 13.39 |
| C + LutHI                                               | 0   | 279.41 | 311.07 | 216.88 | -61.16  | -42.85 | -3433.74778 | -3437.19619 | -3436.91283 | 6.89  | 8.13  | -1.64 | -2.89 |

..with SiMe<sub>3</sub>OCHO (D) being 3.9 kcal/mol bound to B(C<sub>6</sub>F<sub>5</sub>)<sub>3</sub> within adduct C

|                                                    |   |        |        |        |        |        |             |             |             |        |        |       |       |
|----------------------------------------------------|---|--------|--------|--------|--------|--------|-------------|-------------|-------------|--------|--------|-------|-------|
| D + B(C <sub>6</sub> F <sub>5</sub> ) <sub>3</sub> | 0 | 178.96 | 204.39 | 124.48 | -25.33 | -16.76 | -2808.35525 | -2811.15657 | -2810.97889 | 0.00   | 0.00   | 0.00  | 0.00  |
| C                                                  | 0 | 180.26 | 205.82 | 139.46 | -20.58 | -15.84 | -2808.38096 | -2811.18512 | -2810.98511 | -16.13 | -17.91 | -3.90 | -2.12 |

D / B(C<sub>6</sub>F<sub>5</sub>)<sub>3</sub> as FLP for H<sub>2</sub>-activation encounter a sizeable barrier of 23.6 kcal/mol (via TS4a)

|                                |     |        |        |        |        |        |             |             |             |       |       |       |       |
|--------------------------------|-----|--------|--------|--------|--------|--------|-------------|-------------|-------------|-------|-------|-------|-------|
| C + H <sub>2</sub>             | 0   | 186.60 | 214.23 | 138.59 | -21.24 | -14.77 | -2809.56155 | -2812.36106 | -2812.15772 | 0.00  | 0.00  | 0.00  | 0.00  |
| TS4a                           | 89i | 187.41 | 214.35 | 144.41 | -20.61 | -15.66 | -2809.53359 | -2812.32827 | -2812.12008 | 17.55 | 20.58 | 23.62 | 20.59 |
| DH <sup>+</sup> A <sup>-</sup> | 0   | 190.55 | 217.50 | 147.61 | -26.94 | -21.45 | -2809.53212 | -2812.33005 | -2812.12599 | 18.47 | 19.46 | 19.91 | 18.92 |

Further reaction of D with SiMe<sub>3</sub>I and then HB(C<sub>6</sub>F<sub>5</sub>)<sub>3</sub><sup>-</sup> is kinetically very facile and -13.3 kcal/mol exergonic

|                                                    |     |        |        |        |         |         |             |             |             |        |        |        |        |
|----------------------------------------------------|-----|--------|--------|--------|---------|---------|-------------|-------------|-------------|--------|--------|--------|--------|
| D + SiMe <sub>3</sub> I                            | 0   | 154.31 | 166.86 | 112.86 | -20.78  | -11.18  | -1305.78272 | -1306.98833 | -1306.82028 | 0.00   | 0.00   | 0.00   | 0.00   |
| D.SiMe <sub>3</sub> I                              | 0   | 154.76 | 168.14 | 125.20 | -20.33  | -12.23  | -1305.78429 | -1306.98947 | -1306.80643 | -0.99  | -0.72  | 8.69   | 8.42   |
| TS4                                                | 23i | 153.90 | 167.46 | 123.74 | -23.95  | -15.81  | -1305.77246 | -1306.97635 | -1306.80136 | 6.44   | 7.52   | 11.88  | 10.80  |
| E <sup>+</sup> + I <sup>-</sup>                    | 0   | 156.36 | 168.90 | 120.15 | -139.36 | -110.34 | -1305.62266 | -1306.82965 | -1306.80801 | 100.44 | 99.57  | 7.70   | 8.57   |
| D + SiMe <sub>3</sub> I + A - LutHI                | 0   | 253.24 | 284.53 | 193.22 | -10.09  | -8.72   | -3218.39773 | -3221.55984 | -3221.25980 | 0.00   | 0.00   | 0.00   | 0.00   |
| TS5                                                | 48i | 253.34 | 284.76 | 206.86 | -22.95  | -17.47  | -3218.38988 | -3221.54910 | -3221.24428 | 4.92   | 6.74   | 9.74   | 7.92   |
| E + B(C <sub>6</sub> F <sub>5</sub> ) <sub>3</sub> | 0   | 256.37 | 286.82 | 196.95 | -27.53  | -17.69  | -3218.39468 | -3221.55668 | -3221.26498 | 1.91   | 1.98   | -3.25  | -3.32  |
| E + A - H <sub>2</sub> - Lut                       | 0   | 263.82 | 293.36 | 223.59 | -28.68  | -24.15  | -3218.43473 | -3221.59873 | -3221.28091 | -23.22 | -24.40 | -13.25 | -12.06 |

|                                                                                                                                                                                                                    |      |        |        |        |         |         |             |             |             |        |        |        |        |
|--------------------------------------------------------------------------------------------------------------------------------------------------------------------------------------------------------------------|------|--------|--------|--------|---------|---------|-------------|-------------|-------------|--------|--------|--------|--------|
| <i>Once formed, acetal SimOCH<sub>2</sub>OSim (E) can be slowly destroyed by SiMe<sub>3</sub><sup>+</sup> transfer from SiMe<sub>3</sub>I and subsequent H<sup>-</sup> transfer from A.</i>                        |      |        |        |        |         |         |             |             |             |        |        |        |        |
| <b>E + SiMe<sub>3</sub>I</b>                                                                                                                                                                                       | 0    | 231.72 | 249.29 | 185.33 | -22.98  | -12.12  | -1715.82216 | -1717.38844 | -1717.10638 | 0.00   | 0.00   | 0.00   | 0.00   |
| <b>TS6</b>                                                                                                                                                                                                         | 72i  | 232.36 | 250.40 | 198.56 | -29.96  | -18.92  | -1715.79873 | -1717.36337 | -1717.07409 | 14.70  | 15.73  | 20.26  | 19.22  |
| <b>F<sup>+</sup> + I<sup>-</sup></b>                                                                                                                                                                               | 0    | 234.38 | 251.66 | 193.94 | -137.35 | -107.76 | -1715.66580 | -1717.23203 | -1717.08868 | 98.12  | 98.15  | 11.10  | 11.07  |
| <b>E + A - LutHI</b>                                                                                                                                                                                               | 0    | 330.65 | 366.96 | 265.70 | -12.29  | -9.66   | -3628.43716 | -3631.95995 | -3631.54589 | 0.00   | 0.00   | 0.00   | 0.00   |
| <b>F<sup>+</sup> + A<sup>-</sup></b>                                                                                                                                                                               | 0    | 333.38 | 368.39 | 268.79 | -88.78  | -78.68  | -3628.31569 | -3631.83639 | -3631.52741 | 76.22  | 77.53  | 11.59  | 10.29  |
| <b>TS7</b>                                                                                                                                                                                                         | 207i | 330.66 | 367.50 | 279.25 | -29.19  | -22.40  | -3628.41973 | -3631.93806 | -3631.52574 | 10.94  | 13.73  | 12.64  | 9.85   |
| <b>F + B(C<sub>6</sub>F<sub>5</sub>)<sub>3</sub> + O(SiMe<sub>3</sub>)<sub>2</sub></b>                                                                                                                             | 0    | 331.86 | 367.31 | 253.66 | -32.90  | -20.26  | -3628.45194 | -3631.97465 | -3631.59366 | -9.27  | -9.23  | -29.98 | -30.02 |
| <i>Further SiMe<sub>3</sub><sup>+</sup> transfer to CH<sub>3</sub>OSiMe<sub>3</sub> (F) followed by hydride transfer from A is still possible but over sizeable barrier of 24.4 kcal/mol (via TS9<sup>+</sup>)</i> |      |        |        |        |         |         |             |             |             |        |        |        |        |
| <b>F + SiMe<sub>3</sub>I</b>                                                                                                                                                                                       | 0    | 165.29 | 177.86 | 124.08 | -20.03  | -10.34  | -1231.69790 | -1232.82780 | -1232.64052 | 0.00   | 0.00   | 0.00   | 0.00   |
| <b>F.SiMe<sub>3</sub>I</b>                                                                                                                                                                                         | 0    | 166.16 | 179.34 | 137.05 | -15.73  | -9.47   | -1231.70529 | -1232.83528 | -1232.62895 | -4.64  | -4.69  | 7.26   | 7.32   |
| <b>TS8</b>                                                                                                                                                                                                         | 0    | 166.70 | 179.79 | 137.87 | -32.11  | -20.33  | -1231.67620 | -1232.80456 | -1232.61423 | 13.61  | 14.59  | 16.50  | 15.52  |
| <b>G<sup>+</sup> + I<sup>-</sup></b>                                                                                                                                                                               | 0    | 168.14 | 180.40 | 132.66 | -138.89 | -110.15 | -1231.53487 | -1232.66565 | -1232.62375 | 102.30 | 101.75 | 10.52  | 11.07  |
| <b>G<sup>+</sup> + LutHI</b>                                                                                                                                                                                       | 0    | 267.29 | 284.16 | 220.64 | -86.80  | -68.28  | -1559.21547 | -1560.69326 | -1560.44443 | 0.00   | 0.00   | 10.52  | 11.07  |
| <b>TS9<sup>+</sup></b>                                                                                                                                                                                             | 399i | 262.63 | 281.88 | 226.69 | -56.25  | -46.36  | -1559.24352 | -1560.71272 | -1560.42234 | -17.60 | -12.21 | 24.39  | 19.55  |
| <b>CH<sub>3</sub>I + O(SiMe<sub>3</sub>)<sub>2</sub> + LutH<sup>+</sup></b>                                                                                                                                        | 0    | 263.93 | 281.38 | 205.72 | -68.16  | -56.67  | -1559.24822 | -1560.72884 | -1560.48228 | -20.55 | -22.33 | -13.23 | -10.90 |
| <i>..competitive hydride transfer from A to G<sup>+</sup></i>                                                                                                                                                      |      |        |        |        |         |         |             |             |             |        |        |        |        |
| <b>F + A + SiMe<sub>3</sub>I - LutHI</b>                                                                                                                                                                           | 0    | 264.22 | 295.53 | 204.45 | -9.34   | -7.88   | -3144.31290 | -3147.39931 | -3147.08004 | 0.00   | 0.00   | 0.00   | 0.00   |
| <b>G<sup>+</sup> + A<sup>-</sup></b>                                                                                                                                                                               | 0    | 267.13 | 297.13 | 207.51 | -90.32  | -81.07  | -3144.18477 | -3147.27001 | -3147.06249 | 80.41  | 81.14  | 11.01  | 10.28  |
| <b>TS10</b>                                                                                                                                                                                                        | 534i | 264.50 | 295.87 | 217.62 | -27.62  | -21.35  | -3144.28036 | -3147.35634 | -3147.04055 | 20.42  | 26.97  | 24.78  | 18.23  |
| <b>CH<sub>4</sub> + O(SiMe<sub>3</sub>)<sub>2</sub> + B(C<sub>6</sub>F<sub>5</sub>)<sub>3</sub></b>                                                                                                                | 0    | 264.27 | 295.37 | 196.01 | -24.43  | -15.90  | -3144.34975 | -3147.43743 | -3147.14136 | -23.12 | -23.92 | -38.48 | -37.69 |
| <i>2,4,6-Collidine (Col) is 1.9 kcal/mol more basic than 2,6-lutidine (Lut)</i>                                                                                                                                    |      |        |        |        |         |         |             |             |             |        |        |        |        |
| <b>Col + LutH<sup>+</sup></b>                                                                                                                                                                                      | 0    | 206.44 | 217.06 | 167.56 | -66.56  | -56.27  | -694.00872  | -694.75213  | -694.56875  | 0.00   | 0.00   | 0.00   | 0.00   |
| <b>Lut + ColH<sup>+</sup></b>                                                                                                                                                                                      | 0    | 206.41 | 217.05 | 167.51 | -64.34  | -54.31  | -694.01457  | -694.75814  | -694.57171  | -3.67  | -3.77  | -1.86  | -1.75  |
| <i>Potential trapping of B(C<sub>6</sub>F<sub>5</sub>)<sub>3</sub> with Lewis bases in CHCl<sub>3</sub> solution</i>                                                                                               |      |        |        |        |         |         |             |             |             |        |        |        |        |
| <b>Lut + B(C<sub>6</sub>F<sub>5</sub>)<sub>3</sub></b>                                                                                                                                                             | 0    | 184.29 | 207.96 | 132.02 | -28.08  | -19.16  | -2536.76119 | -2539.36459 | -2539.17871 | 0.00   | 0.00   | 0.00   | 0.00   |
| <b>Lut.B(C<sub>6</sub>F<sub>5</sub>)<sub>3</sub></b>                                                                                                                                                               | 0    | 185.95 | 209.44 | 147.77 | -22.85  | -18.28  | -2536.78641 | -2539.39125 | -2539.18187 | -15.83 | -16.73 | -1.99  | -1.09  |
| <i>..with 2.7 kcal/mol higher affinity of Col than Lut that may reduce the H<sub>2</sub>-activation reactivity.</i>                                                                                                |      |        |        |        |         |         |             |             |             |        |        |        |        |
| <b>Col + B(C<sub>6</sub>F<sub>5</sub>)<sub>3</sub></b>                                                                                                                                                             | 0    | 201.79 | 226.26 | 148.21 | -29.46  | -20.06  | -2576.10613 | -2578.75122 | -2578.54097 | 0.00   | 0.00   | 0.00   | 0.00   |
| <b>Col.B(C<sub>6</sub>F<sub>5</sub>)<sub>3</sub></b>                                                                                                                                                               | 0    | 202.48 | 227.34 | 162.84 | -23.94  | -19.09  | -2576.13381 | -2578.78056 | -2578.54848 | -17.37 | -18.42 | -4.71  | -3.66  |
| <i>..Halide anion F<sup>-</sup>, Cl<sup>-</sup> and Br<sup>-</sup> is bound to B(C<sub>6</sub>F<sub>5</sub>)<sub>3</sub></i>                                                                                       |      |        |        |        |         |         |             |             |             |        |        |        |        |

|                                                                               |   |        |        |        |         |         |             |             |             |         |         |        |        |
|-------------------------------------------------------------------------------|---|--------|--------|--------|---------|---------|-------------|-------------|-------------|---------|---------|--------|--------|
| $B(C_6F_5)_3 + F^-$                                                           | 0 | 94.53  | 114.73 | 52.22  | -136.01 | -102.49 | -2309.51513 | -2311.86513 | -2311.93922 | 0.00    | 0.00    | 0.00   | 0.00   |
| $FB(C_6F_5)_3^-$                                                              | 0 | 94.66  | 114.46 | 59.44  | -48.73  | -41.85  | -2309.68320 | -2312.03662 | -2312.00557 | -105.47 | -107.61 | -41.64 | -39.49 |
| $B(C_6F_5)_3 + Cl^-$                                                          | 0 | 94.53  | 114.73 | 51.67  | -122.03 | -90.10  | -2669.93294 | -2672.52066 | -2672.57589 | 0.00    | 0.00    | 0.00   | 0.00   |
| $ClB(C_6F_5)_3^-$                                                             | 0 | 94.16  | 114.07 | 59.13  | -48.17  | -42.15  | -2670.02438 | -2672.61507 | -2672.58500 | -57.38  | -59.24  | -5.71  | -3.85  |
| $B(C_6F_5)_3 + Br^-$                                                          | 0 | 94.53  | 114.73 | 50.94  | -115.78 | -85.67  | -4783.81610 | -4787.29162 | -4787.34094 | 0.00    | 0.00    | 0.00   | 0.00   |
| $BrB(C_6F_5)_3Br^-$                                                           | 0 | 93.78  | 113.94 | 58.17  | -48.60  | -42.55  | -4783.89261 | -4787.37090 | -4787.34299 | -48.01  | -49.74  | -1.29  | 0.44   |
| $B(C_6F_5)_3 + I^-$                                                           | 0 | 94.53  | 114.73 | 50.53  | -107.40 | -80.35  | -2507.30856 | -2509.85749 | -2509.89898 | 0.00    | 0.00    | 0.00   | 0.00   |
| $IB(C_6F_5)_3^-$                                                              | 0 | 93.75  | 113.97 | 58.05  | -49.86  | -43.55  | -2507.37094 | -2509.92203 | -2509.89592 | -39.14  | -40.50  | 1.92   | 3.28   |
| <i>Halide anions are bound to LutH<sup>+</sup> cation</i>                     |   |        |        |        |         |         |             |             |             |         |         |        |        |
| $LutH^+ + Cl^-$                                                               | 0 | 99.19  | 105.53 | 71.01  | -159.13 | -126.31 | -787.83554  | -788.52158  | -788.60368  | 0.00    | 0.00    | 0.00   | 0.00   |
| $LutHCl$                                                                      | 0 | 98.62  | 104.74 | 77.82  | -40.18  | -24.40  | -788.01333  | -788.69628  | -788.60813  | -111.57 | -109.63 | -2.80  | -4.74  |
| $LutH^+ + I^-$                                                                | 0 | 99.19  | 105.53 | 69.88  | -144.50 | -116.55 | -625.21115  | -625.85841  | -625.92677  | 0.00    | 0.00    | 0.00   | 0.00   |
| $LutHI$                                                                       | 0 | 99.15  | 105.25 | 77.42  | -40.58  | -27.01  | -625.36682  | -626.01107  | -625.92773  | -97.69  | -95.80  | -0.60  | -2.49  |
| <i>Salt LutHCl is also bound to B(C<sub>6</sub>F<sub>5</sub>)<sub>3</sub></i> |   |        |        |        |         |         |             |             |             |         |         |        |        |
| $LutHCl + B(C_6F_5)_3$                                                        | 0 | 193.16 | 217.99 | 138.92 | -54.90  | -35.87  | -2997.63566 | -3000.57031 | -3000.40007 | 0.00    | 0.00    | 0.00   | 0.00   |
| $LutH^+ + ClB(C_6F_5)_3^-$                                                    | 0 | 193.35 | 218.12 | 139.57 | -99.99  | -89.83  | -2997.54931 | -3000.49001 | -3000.40472 | 54.19   | 50.39   | -2.92  | 0.88   |
| $LutHClB(C_6F_5)_3$                                                           | 0 | 193.06 | 218.65 | 152.37 | -30.55  | -24.90  | -2997.67479 | -3000.61507 | -3000.40892 | -24.55  | -28.09  | -5.56  | -2.02  |

**Table S2.** TPSS-D3/def2-TZVP + COSMO optimized Cartesian coordinates (in Å) in CHCl<sub>3</sub> solution. Each structure is labeled by the specific name (See Table S1), followed by the number of atoms, the total energy (in hartrees), and the detailed atomic coordinates (in double-column text list).

**A.CO<sub>2</sub> : complex of [LutH][HB(C<sub>6</sub>F<sub>5</sub>)<sub>3</sub>] and CO<sub>2</sub>**

56

Energy = -2726.566212141

|   |            |            |            |
|---|------------|------------|------------|
| B | -0.3013620 | 0.3551583  | 0.6199155  |
| C | -1.2843824 | -0.1293539 | 1.8401267  |
| C | -1.1985964 | 0.4568739  | -0.7439572 |
| C | 1.0699925  | -0.5357771 | 0.5176905  |
| C | -1.3025272 | -1.3824459 | 2.4505417  |
| C | -2.2342683 | 0.7666785  | 2.3357193  |
| C | -1.3371623 | 1.6410945  | -1.4655006 |
| C | -1.9703055 | -0.6028090 | -1.2239451 |
| C | 1.9513660  | -0.5006079 | 1.6037615  |
| C | 1.5217012  | -1.3132588 | -0.5475855 |
| C | -2.1717693 | -1.7276745 | 3.4835186  |
| F | -0.4485884 | -2.3615238 | 2.0479186  |
| C | -3.1253714 | 0.4685085  | 3.3618231  |
| F | -2.3280485 | 2.0106799  | 1.7994056  |
| C | -2.1554146 | 1.7782503  | -2.5853727 |
| F | -0.6442858 | 2.7588219  | -1.1057141 |
| C | -2.8048406 | -0.5176537 | -2.3327664 |
| F | -1.9149741 | -1.8051295 | -0.5988641 |
| C | 3.1639648  | -1.1780200 | 1.6561215  |
| F | 1.6340649  | 0.2405595  | 2.6981037  |
| C | 2.7368246  | -1.9984669 | -0.5520227 |
| F | 0.7869412  | -1.4383214 | -1.6859736 |
| C | -3.0922426 | -0.7941353 | 3.9450791  |
| F | -2.1366434 | -2.9603352 | 4.0370076  |
| F | -4.0198013 | 1.3829589  | 3.7980975  |
| C | -2.8974858 | 0.6879799  | -3.0232879 |
| F | -2.2333826 | 2.9527430  | -3.2495222 |
| F | -3.5198246 | -1.5825706 | -2.7534053 |
| C | 3.5664761  | -1.9348980 | 0.5599309  |
| F | 3.9689726  | -1.0894754 | 2.7374693  |
| F | 3.1250170  | -2.7122760 | -1.6308405 |
| F | -3.9443908 | -1.1088462 | 4.9406783  |
| F | -3.6953928 | 0.7949570  | -4.1028296 |
| F | 4.7527362  | -2.5729573 | 0.5665637  |
| H | 0.0665428  | 1.4740800  | 0.8985507  |
| C | 4.5414017  | 1.2900935  | -0.2118468 |
| C | 5.5153568  | 0.5138221  | -0.8254909 |
| C | 5.3218023  | 0.0650423  | -2.1300824 |
| C | 4.1560782  | 0.3914036  | -2.8199368 |
| C | 3.1818133  | 1.1611404  | -2.1999028 |
| N | 3.4206188  | 1.5711678  | -0.9259123 |
| H | 6.0824071  | -0.5409615 | -2.6107651 |
| H | 6.4159278  | 0.2695981  | -0.2753775 |
| H | 3.9899373  | 0.0520651  | -3.8349800 |

|   |            |           |            |
|---|------------|-----------|------------|
| C | 4.6634520  | 1.8657727 | 1.1616016  |
| H | 5.4512271  | 1.3518402 | 1.7128974  |
| H | 4.9221016  | 2.9290628 | 1.0966312  |
| H | 3.7254635  | 1.7835558 | 1.7162831  |
| C | 1.8849510  | 1.5516523 | -2.8252182 |
| H | 1.6441894  | 2.5971685 | -2.6152972 |
| H | 1.9308096  | 1.4002098 | -3.9039684 |
| H | 1.0756205  | 0.9319913 | -2.4230163 |
| H | 2.7022453  | 2.1393436 | -0.4686222 |
| O | 1.8421990  | 3.6065295 | 0.6064344  |
| C | 0.8946472  | 3.8669551 | 1.2484692  |
| O | -0.0232070 | 4.1660186 | 1.8958050  |

**A<sup>-</sup> : anion HB(C<sub>6</sub>F<sub>5</sub>)<sub>3</sub><sup>-</sup>**

35

Energy = -2210.260699305

|   |            |            |            |
|---|------------|------------|------------|
| B | -0.0149056 | -0.0067681 | 0.6432442  |
| C | 0.9195088  | -1.2744247 | 0.1936152  |
| C | -1.5783824 | -0.1699714 | 0.1857561  |
| C | 0.6302561  | 1.4314031  | 0.1992463  |
| C | 1.8189725  | -1.2977193 | -0.8711092 |
| C | 0.8737712  | -2.4598237 | 0.9293312  |
| C | -2.5703849 | 0.5153108  | 0.8897350  |
| C | -2.0612972 | -0.9662340 | -0.8513465 |
| C | 0.1923303  | 2.2520499  | -0.8387498 |
| C | 1.7158048  | 1.9420963  | 0.9130643  |
| C | 2.6278045  | -2.3885075 | -1.1813904 |
| F | 1.9352663  | -0.2255741 | -1.7002665 |
| C | 1.6561544  | -3.5781214 | 0.6571793  |
| F | 0.0173634  | -2.5726208 | 1.9792921  |
| C | -3.9306402 | 0.4233152  | 0.6121210  |
| F | -2.2236029 | 1.3439093  | 1.9105532  |
| C | -3.4124062 | -1.0961840 | -1.1659114 |
| F | -1.2042687 | -1.6607348 | -1.6478165 |
| C | 0.7616683  | 3.4859094  | -1.1459133 |
| F | -0.8317559 | 1.8612193  | -1.6446116 |
| C | 2.3214218  | 3.1654881  | 0.6438790  |
| F | 2.2512749  | 1.2225832  | 1.9350541  |
| C | 2.5471861  | -3.5415585 | -0.4097422 |
| F | 3.4828252  | -2.3463246 | -2.2302731 |
| F | 1.5647856  | -4.6975258 | 1.4130473  |
| C | -4.3581681 | -0.3952909 | -0.4275703 |
| F | -4.8423849 | 1.1144085  | 1.3358993  |
| F | -3.8170558 | -1.8870563 | -2.1874913 |
| C | 1.8362420  | 3.9497122  | -0.3968660 |
| F | 0.2908060  | 4.2350951  | -2.1705235 |
| F | 3.3709460  | 3.6044347  | 1.3776040  |



F 3.3194089 -4.6121291 -0.6944029  
 F -5.6724777 -0.5033383 -0.7181542  
 F 2.4045317 5.1418106 -0.6784725  
 H -0.0209564 -0.0090533 1.8535777

A : contact ion pair [LutH][HB(C<sub>6</sub>F<sub>5</sub>)<sub>3</sub>]

53

Energy = -2537.867428391

B -0.2444229 -0.2130921 0.2018416  
 C -1.6302008 -0.7899428 -0.4432109  
 C -0.4167026 0.0590939 1.7992857  
 C 0.4124813 1.0091098 -0.6632618  
 C -2.5174328 -0.0778959 -1.2491349  
 C -2.0019171 -2.1129425 -0.2009450  
 C 0.4959055 -0.4266452 2.7321794  
 C -1.5057404 0.7324331 2.3528167  
 C 0.8382122 0.7556702 -1.9693190  
 C 0.6598543 2.3110099 -0.2273186  
 C -3.6753719 -0.6281380 -1.7939484  
 F -2.2865901 1.2279878 -1.5390328  
 C -3.1465903 -2.7080990 -0.7216074  
 F -1.2206146 -2.8984793 0.5899041  
 C 0.3577583 -0.2760352 4.1092981  
 F 1.6166778 -1.0918020 2.3173382  
 C -1.6927497 0.9094455 3.7197618  
 F -2.4434541 1.2764175 1.5377867  
 C 1.4668552 1.6858107 -2.7893047  
 F 0.6449011 -0.4828545 -2.5064865  
 C 1.2830323 3.2829368 -1.0102019  
 F 0.3012022 2.7062944 1.0188983  
 C -3.9931326 -1.9559826 -1.5297354  
 F -4.4959387 0.1118977 -2.5694563  
 F -3.4450377 -3.9980776 -0.4551286  
 C -0.7511037 0.3979876 4.6085053  
 F 1.2802309 -0.7732363 4.9610196  
 F -2.7653535 1.5754185 4.1955541  
 C 1.6919805 2.9703509 -2.3022918  
 F 1.8586107 1.3622615 -4.0391094  
 F 1.4956371 4.5240803 -0.5283873  
 F -5.1080901 -2.5061738 -2.0465912  
 F -0.9096306 0.5586145 5.9354647  
 F 2.2932659 3.8954303 -3.0714679  
 H 0.5339591 -1.1486182 0.1171919  
 C 2.8776009 -2.7401894 -1.3145521  
 C 4.0553040 -3.1503518 -1.9243944  
 C 5.1920080 -2.3481207 -1.8387811  
 C 5.1500470 -1.1417365 -1.1436298  
 C 3.9662321 -0.7364786 -0.5397203  
 N 2.8900698 -1.5539431 -0.6531701  
 H 6.1149080 -2.6663679 -2.3127233  
 H 4.0718284 -4.0935539 -2.4572345

H 6.0263630 -0.5097937 -1.0621147  
 C 1.5991909 -3.5143877 -1.3295961  
 H 1.7331671 -4.4414446 -1.8874739  
 H 1.2813584 -3.7524066 -0.3095173  
 H 0.8012026 -2.9260640 -1.7927287  
 C 3.8018836 0.5493139 0.2037835  
 H 3.1362982 0.4278944 1.0607720  
 H 4.7730181 0.9106226 0.5448321  
 H 3.3669466 1.3079357 -0.4574611  
 H 1.9892720 -1.2567310 -0.2214255

BrB(C<sub>6</sub>F<sub>5</sub>)<sub>3</sub><sup>-</sup> : bromide binding to B(C<sub>6</sub>F<sub>5</sub>)<sub>3</sub>  
 35

Energy = -4783.767073362

B -0.0032902 0.0028545 0.5783313  
 C 0.9355715 -1.2714125 0.1842105  
 C -1.5752095 -0.1745727 0.1807270  
 C 0.6333985 1.4520676 0.1848990  
 C 2.0328990 -1.2191873 -0.6786008  
 C 0.6883184 -2.5482070 0.7070279  
 C -2.5586184 0.6781717 0.7007065  
 C -2.0773304 -1.1544903 -0.6791634  
 C 0.0390287 2.3820825 -0.6712854  
 C 1.8680593 1.8685740 0.7017175  
 C 2.8571636 -2.3087317 -0.9580885  
 F 2.3577632 -0.0760490 -1.3373118  
 C 1.4825110 -3.6603554 0.4566257  
 F -0.4026166 -2.7696882 1.4760984  
 C -3.9186025 0.5443402 0.4502955  
 F -2.2061795 1.7350511 1.4684416  
 C -3.4329163 -1.3259300 -0.9583582  
 F -1.2492012 -2.0095777 -1.3342287  
 C 0.5770916 3.6376101 -0.9526637  
 F -1.1203699 2.1011395 -1.3214539  
 C 2.4408074 3.1088025 0.4490385  
 F 2.6044230 1.0295232 1.4663913  
 C 2.5869643 -3.5406702 -0.3803124  
 F 3.9108122 -2.1779157 -1.7944360  
 F 1.1835122 -4.8616211 0.9985146  
 C -4.3658166 -0.4752593 -0.3834295  
 F -4.8103452 1.4048373 0.9890005  
 F -3.8453911 -2.3067590 -1.7918758  
 C 1.7856143 4.0106364 -0.3828042  
 F -0.0623787 4.4901116 -1.7840300  
 F 3.6365930 3.4417259 0.9831892  
 F 3.3692148 -4.6070626 -0.6384802  
 F -5.6802489 -0.6222828 -0.6410818  
 F 2.3247211 5.2177484 -0.6435011  
 Br -0.0062340 0.0043191 2.7520456

CIB(C<sub>6</sub>F<sub>5</sub>)<sub>3</sub><sup>-</sup> : chloride binding to B(C<sub>6</sub>F<sub>5</sub>)<sub>3</sub>

35

Energy = -2669.938586442

|    |            |            |            |
|----|------------|------------|------------|
| B  | -0.0029853 | 0.0031902  | 0.6303640  |
| C  | 0.9349870  | -1.2710914 | 0.2046361  |
| C  | -1.5741921 | -0.1737526 | 0.2005454  |
| C  | 0.6340814  | 1.4514232  | 0.2044687  |
| C  | 2.0095418  | -1.2209233 | -0.6847065 |
| C  | 0.7044704  | -2.5434322 | 0.7426884  |
| C  | -2.5622267 | 0.6638228  | 0.7332197  |
| C  | -2.0664002 | -1.1355302 | -0.6832883 |
| C  | 0.0513990  | 2.3638388  | -0.6764506 |
| C  | 1.8576915  | 1.8791591  | 0.7350808  |
| C  | 2.8256180  | -2.3116018 | -0.9832040 |
| F  | 2.3189722  | -0.0781714 | -1.3527420 |
| C  | 1.4909723  | -3.6575144 | 0.4747220  |
| F  | -0.3656718 | -2.7616853 | 1.5431996  |
| C  | -3.9200525 | 0.5360098  | 0.4660257  |
| F  | -2.2175378 | 1.7045969  | 1.5279745  |
| C  | -3.4188962 | -1.3011534 | -0.9804300 |
| F  | -1.2304723 | -1.9778186 | -1.3463255 |
| C  | 0.5929729  | 3.6140837  | -0.9741227 |
| F  | -1.0998750 | 2.0698317  | -1.3365060 |
| C  | 2.4339048  | 3.1153289  | 0.4683514  |
| F  | 2.5833712  | 1.0542000  | 1.5267184  |
| C  | 2.5715198  | -3.5411857 | -0.3929414 |
| F  | 3.8573348  | -2.1846294 | -1.8477433 |
| F  | 1.2073592  | -4.8569816 | 1.0297832  |
| C  | -4.3579998 | -0.4641957 | -0.3952954 |
| F  | -4.8183318 | 1.3834042  | 1.0156986  |
| F  | -3.8233956 | -2.2644398 | -1.8386317 |
| C  | 1.7918785  | 3.9993840  | -0.3919591 |
| F  | -0.0344436 | 4.4514519  | -1.8303367 |
| F  | 3.6199857  | 3.4612406  | 1.0168223  |
| F  | 3.3481363  | -4.6083989 | -0.6668955 |
| F  | -5.6703317 | -0.6070918 | -0.6681744 |
| F  | 2.3335044  | 5.2028490  | -0.6665061 |
| Cl | -0.0051709 | 0.0056059  | 2.5921157  |

IB(C<sub>6</sub>F<sub>5</sub>)<sub>3</sub><sup>-</sup> : iodide binding to B(C<sub>6</sub>F<sub>5</sub>)<sub>3</sub>

35

Energy = -2507.297119770

|   |            |            |            |
|---|------------|------------|------------|
| B | -0.0029089 | 0.0024247  | 0.5144872  |
| C | 0.9355998  | -1.2725348 | 0.1591478  |
| C | -1.5752295 | -0.1757844 | 0.1563383  |
| C | 0.6336776  | 1.4519861  | 0.1591005  |
| C | 2.0514405  | -1.2228677 | -0.6822782 |
| C | 0.6745611  | -2.5509508 | 0.6739752  |
| C | -2.5537971 | 0.6906633  | 0.6657606  |
| C | -2.0878579 | -1.1716977 | -0.6813287 |
| C | 0.0277740  | 2.4022941  | -0.6690135 |
| C | 1.8793834  | 1.8559356  | 0.6622743  |

|   |            |            |            |
|---|------------|------------|------------|
| C | 2.8820200  | -2.3126065 | -0.9399643 |
| F | 2.3863639  | -0.0834156 | -1.3408788 |
| C | 1.4753654  | -3.6623329 | 0.4452008  |
| F | -0.4320137 | -2.7700554 | 1.4197172  |
| C | -3.9159714 | 0.5519454  | 0.4334361  |
| F | -2.1925632 | 1.7599705  | 1.4103228  |
| C | -3.4462102 | -1.3463196 | -0.9432230 |
| F | -1.2672286 | -2.0359302 | -1.3322803 |
| C | 0.5624020  | 3.6635593  | -0.9290426 |
| F | -1.1369621 | 2.1344063  | -1.3135821 |
| C | 2.4474196  | 3.1019204  | 0.4310907  |
| F | 2.6242899  | 1.0007565  | 1.3988221  |
| C | 2.5995148  | -3.5435088 | -0.3656024 |
| F | 3.9515480  | -2.1836716 | -1.7553861 |
| F | 1.1643732  | -4.8619028 | 0.9825733  |
| C | -4.3725735 | -0.4836202 | -0.3755125 |
| F | -4.8008255 | 1.4226122  | 0.9654670  |
| F | -3.8672912 | -2.3405754 | -1.7553933 |
| C | 1.7794489  | 4.0234445  | -0.3688068 |
| F | -0.0879584 | 4.5333563  | -1.7328107 |
| F | 3.6502639  | 3.4222237  | 0.9554334  |
| F | 3.3873146  | -4.6097056 | -0.6037575 |
| F | -5.6888623 | -0.6326719 | -0.6187176 |
| F | 2.3151064  | 5.2354108  | -0.6102015 |
| I | 0.0001047  | 0.0070651  | 2.9807874  |

B(C<sub>6</sub>F<sub>5</sub>)<sub>3</sub> : Lewis acidic borane

34

Energy = -2209.515840507

|   |            |            |            |
|---|------------|------------|------------|
| B | -0.0004361 | 0.0008220  | 0.0000543  |
| C | -0.0001375 | 1.5634454  | -0.0002793 |
| C | 1.3521791  | -0.7825738 | -0.0031074 |
| C | -1.3528031 | -0.7827121 | 0.0035198  |
| C | -0.9390036 | 2.3140885  | 0.7245587  |
| C | 0.9392734  | 2.3133266  | -0.7252105 |
| C | 2.4652097  | -0.3612640 | 0.7399196  |
| C | 1.5356251  | -1.9552537 | -0.7512925 |
| C | -1.5353823 | -1.9564497 | 0.7503967  |
| C | -2.4665976 | -0.3609467 | -0.7382299 |
| C | -0.9469478 | 3.7025439  | 0.7462974  |
| C | 0.9481473  | 3.7017790  | -0.7471988 |
| C | 3.6706593  | -1.0503174 | 0.7571007  |
| C | 2.7338610  | -2.6567057 | -0.7805290 |
| C | -2.7333768 | -2.6583050 | 0.7796963  |
| C | -3.6717743 | -1.0504731 | -0.7554297 |
| C | 0.0008195  | 4.3999087  | -0.0005284 |
| C | 3.8062528  | -2.2026396 | -0.0150480 |
| C | -3.8064447 | -2.2038069 | 0.0153923  |
| F | -1.8694110 | 1.6894036  | 1.4759324  |
| F | 1.8693611  | 1.6879369  | -1.4764017 |
| F | 2.3824433  | 0.7414539  | 1.5134575  |

F 0.5329502 -2.4301995 -1.5195149  
 F -0.5321104 -2.4321007 1.5173460  
 F -2.3849326 0.7427168 -1.5104101  
 F -1.8509490 4.3779748 1.4728263  
 F 1.8525908 4.3764718 -1.4738463  
 F 4.7016982 -0.6229578 1.5024375  
 F 2.8715403 -3.7599952 -1.5322918  
 F -2.8701370 -3.7624867 1.5302886  
 F -4.7034421 -0.6226112 -1.4996020  
 F 0.0012505 5.7359161 -0.0006620  
 F 4.9631586 -2.8711082 -0.0210587  
 F -4.9630654 -2.8726708 0.0213904

Br<sup>-</sup> : bromide

1

Energy = -2574.218173369

Br 0.0000000 0.0000000 0.0000000

**B<sup>-</sup>.SiMe<sub>3</sub>I** : loose complex of **B<sup>-</sup>** and SiMe<sub>3</sub>I

52

Energy = -3106.012474801

O 0.3866301 0.1398805 -1.9317045  
 C -0.9208464 0.2689675 -1.9639326  
 H -1.3838904 0.4914587 -0.9842973  
 O -1.5953721 0.1540515 -2.9763636  
 Si -4.8723767 -0.4316370 -1.3943360  
 C -3.7724965 -1.7036347 -0.5705158  
 C -4.3659635 1.3336396 -1.0354424  
 C -5.0916848 -0.7543311 -3.2222323  
 H -2.7717121 -1.6709756 -1.0155350  
 H -3.6833819 -1.5111845 0.5031796  
 H -4.1739091 -2.7131771 -0.7051455  
 H -3.4423359 1.5585019 -1.5815367  
 H -5.1390631 2.0339608 -1.3680950  
 H -4.1948714 1.4932053 0.0341752  
 H -4.1189268 -0.6256386 -3.7127008  
 H -5.4479838 -1.7730434 -3.4067207  
 H -5.8034975 -0.0513608 -3.6671912  
 I -7.1391381 -0.7247056 -0.3289535  
 B 1.1065012 0.1807516 -0.5874572  
 C 1.1741897 1.6999939 0.0559441  
 C 0.3312361 -0.9208170 0.3643837  
 C 2.6704964 -0.2049829 -0.9361656  
 C 1.9059267 1.9014271 1.2289715  
 C 0.6528450 2.8689575 -0.4975485  
 C 0.2953056 -2.2576815 -0.0469998  
 C -0.4212190 -0.6571514 1.5085366  
 C 3.3223895 0.4851033 -1.9633372  
 C 3.4758290 -1.1218671 -0.2602694  
 C 2.1115098 3.1390105 1.8245553  
 C 0.8303049 4.1341727 0.0633532

C -0.3898698 -3.2637363 0.6236211  
 C -1.1237808 -1.6326537 2.2156764  
 C 4.6486349 0.2688111 -2.3260553  
 C 4.8078367 -1.3691177 -0.5868249  
 C 1.5656592 4.2736422 1.2326514  
 C -1.1055891 -2.9485516 1.7739845  
 C 5.4003404 -0.6723660 -1.6321656  
 F 2.4524591 0.8313701 1.8630613  
 F -0.0829005 2.8445193 -1.6393052  
 F 0.9647125 -2.6354079 -1.1637565  
 F -0.5413632 0.6047528 1.9966663  
 F 2.6709223 1.4515520 -2.6543383  
 F 2.9958269 -1.8383659 0.7875221  
 F 2.8236167 3.2544015 2.9666201  
 F 0.2959618 5.2280153 -0.5221901  
 F -0.3726065 -4.5368264 0.1748069  
 F -1.8442281 -1.3055090 3.3104105  
 F 5.2172428 0.9686324 -3.3324513  
 F 5.5309879 -2.2781926 0.1039112  
 F 1.7472033 5.4883239 1.7866222  
 F -1.7891571 -3.9012822 2.4349287  
 F 6.6872199 -0.8983952 -1.9622833

**B<sup>-</sup>** : anion OCHOB(C<sub>6</sub>F<sub>5</sub>)<sub>3</sub><sup>-</sup>

38

Energy = -2398.973786046

B -1.5961085 -0.7316217 -0.4069755  
 C -0.8440161 -1.4654977 0.8672074  
 C -1.8081015 0.8336505 0.0773639  
 C -2.9821204 -1.4794659 -0.8964134  
 C -1.4018497 -2.3931123 1.7473831  
 C 0.4674402 -1.0935401 1.1810124  
 C -1.2122516 1.9668658 -0.4749152  
 C -2.5777521 1.0908359 1.2149036  
 C -2.9261744 -2.8335491 -1.2448747  
 C -4.2248952 -0.8863393 -1.1161371  
 C -0.7174193 -2.9403228 2.8312361  
 F -2.6817284 -2.8196101 1.5995497  
 C 1.1900580 -1.6151746 2.2502795  
 F 1.1029613 -0.1496834 0.4444585  
 C -1.3659952 3.2518284 0.0473022  
 F -0.4331792 1.8865782 -1.5840026  
 C -2.7608036 2.3497315 1.7718845  
 F -3.2170728 0.0629939 1.8322619  
 C -4.0045293 -3.5595896 -1.7359245  
 F -1.7653126 -3.5187714 -1.0971267  
 C -5.3352781 -1.5724280 -1.6082987  
 F -4.4258858 0.4361369 -0.8785517  
 C 0.5923075 -2.5531468 3.0841185  
 F -1.3148351 -3.8420440 3.6419196  
 F 2.4568946 -1.2137709 2.4953843

C -2.1445500 3.4478426 1.1798646  
 F -0.7624780 4.3098691 -0.5378119  
 F -3.5295364 2.5230451 2.8695190  
 C -5.2271655 -2.9211950 -1.9187500  
 F -3.8843280 -4.8709973 -2.0348545  
 F -6.5104643 -0.9345212 -1.8019858  
 F 1.2698854 -3.0716307 4.1275118  
 F -2.3036984 4.6821859 1.6970214  
 F -6.2874303 -3.6007569 -2.3964141  
 O -0.6132664 -0.8620775 -1.5601882  
 C -0.9662848 -0.5324698 -2.7864814  
 O -0.2341811 -0.6585226 -3.7551114  
 H -1.9918175 -0.1292771 -2.8828956

**B** : contact ion pair [LutH][OCHOB(C<sub>6</sub>F<sub>5</sub>)<sub>3</sub>]  
 56

Energy = -2726.585036755

B -1.6947811 -0.7904473 -0.3996197  
 C -0.9699978 -1.6297726 0.8235790  
 C -1.7933539 0.7697989 0.1018775  
 C -3.1189051 -1.4148540 -0.9272955  
 C -1.5168220 -2.6690490 1.5772610  
 C 0.3343015 -1.2852910 1.1898032  
 C -1.2608551 1.8890663 -0.5329544  
 C -2.4108988 1.0442504 1.3246980  
 C -3.1681373 -2.7345739 -1.3892712  
 C -4.3304488 -0.7292856 -1.0432731  
 C -0.8148117 -3.3575249 2.5661670  
 F -2.7980210 -3.0644196 1.3945883  
 C 1.0787517 -1.9469772 2.1607686  
 F 0.9543423 -0.2330746 0.5876766  
 C -1.3090022 3.1767006 -0.0012073  
 F -0.6555943 1.7867605 -1.7493322  
 C -2.4890045 2.3083444 1.8954216  
 F -3.0054632 0.0335282 2.0105197  
 C -4.3039091 -3.3481387 -1.9009519  
 F -2.0490916 -3.5048520 -1.3424564  
 C -5.4985570 -1.3023661 -1.5468469  
 F -4.4427165 0.5707140 -0.6763075  
 C 0.4983841 -3.0033827 2.8547521  
 F -1.3977714 -4.3616106 3.2495563  
 F 2.3464946 -1.5751670 2.4358563  
 C -1.9261241 3.3904637 1.2248524  
 F -0.7649992 4.2164444 -0.6668939  
 F -3.1059469 2.5008702 3.0785025  
 C -5.4887490 -2.6222324 -1.9780875  
 F -4.2741295 -4.6299700 -2.3154276  
 F -6.6343796 -0.5820869 -1.6297084  
 F 1.1910917 -3.6599260 3.8009515  
 F -1.9860917 4.6257002 1.7529460  
 F -6.6029890 -3.1881886 -2.4701441

O -0.6755489 -0.9492777 -1.5549137  
 C -0.9816108 -0.7362943 -2.8283834  
 O -0.1610319 -0.8971624 -3.7159217  
 H -2.0169320 -0.4130580 -3.0152986  
 C 2.3708965 -3.0442441 -1.2513076  
 C 3.6959205 -3.4119971 -1.0561727  
 C 4.7034409 -2.4618081 -1.2066267  
 C 4.3853616 -1.1503481 -1.5506856  
 C 3.0566043 -0.7914809 -1.7404277  
 N 2.1153519 -1.7550439 -1.5852230  
 H 5.7399578 -2.7442817 -1.0531964  
 H 3.9259819 -4.4368454 -0.7892837  
 H 5.1569191 -0.3985850 -1.6695649  
 C 1.2105662 -3.9773867 -1.1155023  
 H 1.3263079 -4.8188621 -1.8054276  
 H 1.1754163 -4.3862068 -0.1005517  
 H 0.2677254 -3.4724041 -1.3222451  
 C 2.6028724 0.5885495 -2.0925498  
 H 1.5201792 0.6380918 -2.1993201  
 H 2.9169218 1.2896556 -1.3128490  
 H 3.0677868 0.9043911 -3.0315177  
 H 1.1231170 -1.4740499 -1.6980455

CH<sub>3</sub>I : product methyl iodide

5

Energy = -337.5394900037

C -0.0000070 -0.0000004 -1.8384228  
 H 0.0000065 1.0409015 -2.1511480  
 H -0.9014352 -0.5204604 -2.1511799  
 H 0.9014304 -0.5204502 -2.1511679  
 I 0.0000053 0.0000106 0.3257044

CH<sub>4</sub> : product methane

5

Energy = -40.54212270591

C -0.0000043 0.0000020 -0.0003787  
 H 0.0000019 1.0306080 -0.3647528  
 H -0.8925246 -0.5153126 -0.3647740  
 H 0.8925212 -0.5153084 -0.3647666  
 H 0.0000056 0.0000119 1.0927443

Cl<sup>-</sup> : chloride anion

1

Energy = -460.3767818432

Cl 0.0000000 0.0000000 0.0000000

CO<sub>2</sub> : carbon dioxide

3

Energy = -188.6978139777

C -0.0000054 0.0000001 0.0000003  
 O 1.1686606 0.0000398 0.0000686

O -1.1686447 -0.0000365 -0.0000659

Col.B(C<sub>6</sub>F<sub>5</sub>)<sub>3</sub> : adduct of 2,4,6-collidine

54

Energy = -2576.011449777

B -0.1333268 -0.1062963 0.4295074  
 C 0.4826585 1.3960283 0.1230354  
 C 1.0523988 -1.0277223 -0.2794518  
 C -1.6513944 -0.3394630 -0.1770572  
 C -0.0770407 2.3649813 -0.7135639  
 C 1.7874890 1.6943180 0.5361160  
 C 2.0116755 -1.8290782 0.3434026  
 C 1.2663694 -0.8633590 -1.6544921  
 C -2.7137535 0.4014086 0.3512761  
 C -2.0498289 -1.2552335 -1.1558167  
 C 0.5815606 3.5367363 -1.0884465  
 F -1.3159224 2.2179470 -1.2379081  
 C 2.4812673 2.8462769 0.1928236  
 F 2.4382219 0.8353581 1.3659326  
 C 3.0602454 -2.4548975 -0.3284999  
 F 1.9818911 -2.0444836 1.6841578  
 C 2.2943181 -1.4671873 -2.3678311  
 F 0.4414671 -0.0610157 -2.3720434  
 C -4.0396822 0.2870872 -0.0467604  
 F -2.4700032 1.3313507 1.3109145  
 C -3.3648939 -1.4046097 -1.5944385  
 F -1.1692320 -2.1173691 -1.7219494  
 C 1.8691953 3.7851944 -0.6326757  
 F -0.0205902 4.4258203 -1.9008683  
 F 3.7259458 3.0692753 0.6576517  
 C 3.2046850 -2.2783400 -1.6980250  
 F 3.9415099 -3.2212080 0.3448608  
 F 2.4205647 -1.2710737 -3.6946322  
 C -4.3726722 -0.6270570 -1.0399644  
 F -4.9961151 1.0570906 0.5073539  
 F -3.6687515 -2.3183691 -2.5364459  
 F 2.5140188 4.9095736 -0.9814898  
 F 4.2078846 -2.8742860 -2.3632708  
 F -5.6443418 -0.7610578 -1.4481763  
 C -0.1863906 0.4476854 3.0748779  
 C -0.2583669 0.0240221 4.3976630  
 C -0.4861451 -1.3029703 4.7474640  
 C -0.6906190 -2.1783535 3.6883912  
 C -0.6150107 -1.7596346 2.3662691  
 N -0.3055420 -0.4568876 2.0409402  
 H -0.1433880 0.7784778 5.1691231  
 H -0.9146266 -3.2234991 3.8743934  
 C -0.0207437 1.9345563 2.8950876  
 H -0.4125230 2.4147040 3.7944165  
 H 1.0335685 2.2112776 2.8146039  
 H -0.5512626 2.3271312 2.0342885

C -0.9323593 -2.7978399 1.3284955  
 H -0.3724492 -2.6949409 0.4032540  
 H -0.7313149 -3.7838836 1.7514270  
 H -1.9990954 -2.7503511 1.0827134  
 C -0.5504788 -1.7458176 6.1798025  
 H 0.3241009 -1.3888658 6.7332143  
 H -1.4372941 -1.3221160 6.6658536  
 H -0.6012100 -2.8340570 6.2569596

[ColH][HB(C<sub>6</sub>F<sub>5</sub>)<sub>3</sub>] : contact ion pair cA

56

Energy = -2577.212382218

B -0.2553583 -0.2162724 0.1968714  
 C -1.6474975 -0.7806619 -0.4465814  
 C -0.4181444 0.0521295 1.7967537  
 C 0.4041393 1.0068680 -0.6646829  
 C -2.5316347 -0.0604967 -1.2484415  
 C -2.0270477 -2.1023160 -0.2084950  
 C 0.5043068 -0.4316427 2.7208406  
 C -1.5045723 0.7206305 2.3614017  
 C 0.8363732 0.7538175 -1.9687882  
 C 0.6481062 2.3089823 -0.2273212  
 C -3.6938597 -0.6014415 -1.7935200  
 F -2.2934279 1.2452520 -1.5338597  
 C -3.1766071 -2.6881434 -0.7289012  
 F -1.2495886 -2.8958247 0.5780149  
 C 0.3781899 -0.2840913 4.0994078  
 F 1.6236705 -1.0923167 2.2950391  
 C -1.6801219 0.8940530 3.7304245  
 F -2.4509738 1.2647441 1.5564795  
 C 1.4707164 1.6840578 -2.7843653  
 F 0.6448921 -0.4836770 -2.5080903  
 C 1.2763695 3.2809830 -1.0061432  
 F 0.2795008 2.7047519 1.0158351  
 C -4.0195308 -1.9281073 -1.5334358  
 F -4.5110158 0.1466335 -2.5651275  
 F -3.4837164 -3.9768745 -0.4654850  
 C -0.7285969 0.3848428 4.6098263  
 F 1.3100100 -0.7799341 4.9419107  
 F -2.7508921 1.5552334 4.2172801  
 C 1.6942727 2.9680932 -2.2952955  
 F 1.8696985 1.3610275 -4.0321028  
 F 1.4847702 4.5225867 -0.5233313  
 F -5.1386052 -2.4698275 -2.0507282  
 F -0.8757804 0.5426385 5.9385742  
 F 2.3029003 3.8924825 -3.0597329  
 H 0.5149250 -1.1564477 0.1044556  
 C 2.8826161 -2.7335398 -1.3125104  
 C 4.0547441 -3.1424253 -1.9260291  
 C 5.2123605 -2.3554848 -1.8574272  
 C 5.1509696 -1.1457195 -1.1548431

C 3.9754814 -0.7383843 -0.5436932  
 N 2.8930736 -1.5493823 -0.6466528  
 H 4.0602015 -4.0855947 -2.4614003  
 H 6.0244277 -0.5072659 -1.0800976  
 C 1.6038038 -3.5080683 -1.3310101  
 H 1.7493441 -4.4540935 -1.8531775  
 H 1.2585798 -3.7083464 -0.3120556  
 H 0.8192956 -2.9355327 -1.8357602  
 C 3.8239324 0.5480331 0.2024412  
 H 3.2499363 0.4029838 1.1207346  
 H 4.8049470 0.9560014 0.4479986  
 H 3.2884218 1.2784209 -0.4146182  
 H 1.9963993 -1.2513481 -0.2128981  
 C 6.4905113 -2.8116060 -2.4974778  
 H 7.0288305 -3.4723624 -1.8060780  
 H 6.2927974 -3.3799732 -3.4099566  
 H 7.1424984 -1.9660172 -2.7283975

ColH<sup>+</sup> : *N*-protonated 2,4,6-collidine

21

Energy = -366.9096052395

N 0.0000261 -0.8542024 0.0055878  
 H 0.0000611 -1.8721910 0.0131510  
 C 1.2044519 -0.2251694 -0.0017745  
 C 1.2036099 1.1594377 -0.0145891  
 C 2.4384823 -1.0700841 0.0018177  
 C -0.0000779 1.8773546 -0.0183620  
 H 2.1548465 1.6805174 -0.0248055  
 C -1.2044420 -0.2252442 -0.0014636  
 H 3.0443167 -0.8516342 -0.8828701  
 H 3.0445568 -0.8437837 0.8844123  
 H 2.1959706 -2.1353561 0.0066732  
 C -1.2037080 1.1593375 -0.0147779  
 C -0.0001625 3.3767489 -0.0033631  
 C -2.4383957 -1.0702549 0.0030755  
 H -2.1549824 1.6803302 -0.0249430  
 H -0.8923344 3.7776518 -0.4901012  
 H -0.0012937 3.7290314 1.0362135  
 H 0.8929337 3.7777639 -0.4882965  
 H -2.1958146 -2.1354214 0.0175358  
 H -3.0487214 -0.8369432 0.8808349  
 H -3.0399868 -0.8590265 -0.8863076

Col : Lewis base 2,4,6-collidine

20

Energy = -366.4654118029

N 0.0000534 -0.9367324 0.0075364  
 C 1.1582162 -0.2474601 0.0003620  
 C 1.1928562 1.1496777 -0.0119146  
 C 2.4302367 -1.0573894 0.0024117  
 C -0.0000744 1.8770029 -0.0152018

H 2.1493715 1.6674158 -0.0229072  
 C -1.1581944 -0.2475680 0.0008348  
 H 3.0392996 -0.8336760 -0.8811625  
 H 3.0401618 -0.8277778 0.8839240  
 H 2.1894134 -2.1222843 0.0062207  
 C -1.1929502 1.1495567 -0.0119452  
 C -0.0001564 3.3834798 -0.0000071  
 C -2.4301578 -1.0576012 0.0037498  
 H -2.1495270 1.6671939 -0.0227800  
 H -0.8893883 3.7848219 -0.4949797  
 H -0.0019345 3.7530862 1.0332785  
 H 0.8906739 3.7848881 -0.4920222  
 H -2.1893182 -2.1224163 0.0171865  
 H -3.0442546 -0.8207576 0.8803945  
 H -3.0350605 -0.8412248 -0.8845498

[ColH][OCHOB(C<sub>6</sub>F<sub>5</sub>)<sub>3</sub>] : contact ion pair **cB**  
 59

Energy = -2765.929766110

B -1.6983446 -0.7962836 -0.4130804  
 C -0.9631871 -1.6458879 0.7976613  
 C -1.7792250 0.7665964 0.0841190  
 C -3.1338876 -1.4105169 -0.9225449  
 C -1.4921315 -2.7092705 1.5298935  
 C 0.3385403 -1.2926759 1.1649979  
 C -1.2913438 1.8823891 -0.5917845  
 C -2.3317870 1.0514301 1.3353091  
 C -3.1902128 -2.7150588 -1.4255079  
 C -4.3538026 -0.7320026 -0.9737878  
 C -0.7760354 -3.4105579 2.4995782  
 F -2.7693509 -3.1173549 1.3450409  
 C 1.0967294 -1.9662812 2.1170120  
 F 0.9416184 -0.2197583 0.5833080  
 C -1.3179638 3.1755251 -0.0723114  
 F -0.7515415 1.7698157 -1.8376620  
 C -2.3856336 2.3215368 1.8957901  
 F -2.8838980 0.0467941 2.0643332  
 C -4.3366141 -3.3183064 -1.9251553  
 F -2.0667015 -3.4811259 -1.4339941  
 C -5.5330149 -1.2957685 -1.4622330  
 F -4.4652711 0.5514766 -0.5529395  
 C 0.5336222 -3.0452062 2.7901981  
 F -1.3424562 -4.4368166 3.1638250  
 F 2.3611255 -1.5845604 2.3938629  
 C -1.8674927 3.3993696 1.1837516  
 F -0.8204826 4.2112042 -0.7794110  
 F -2.9403028 2.5240387 3.1078107  
 C -5.5276232 -2.5986547 -1.9421301  
 F -4.3114337 -4.5851548 -2.3838431  
 F -6.6759861 -0.5824591 -1.4827950  
 F 1.2402144 -3.7146608 3.7170628

|   |            |            |            |
|---|------------|------------|------------|
| F | -1.9046719 | 4.6398608  | 1.7016548  |
| F | -6.6524606 | -3.1550408 | -2.4206367 |
| O | -0.6903562 | -0.9584709 | -1.5767554 |
| C | -1.0051262 | -0.7660983 | -2.8513789 |
| O | -0.1859595 | -0.9242015 | -3.7405674 |
| H | -2.0467890 | -0.4634924 | -3.0376688 |
| C | 2.3629882  | -3.0372143 | -1.2510039 |
| C | 3.6837824  | -3.3920180 | -1.0274675 |
| C | 4.7083813  | -2.4448237 | -1.1442672 |
| C | 4.3633853  | -1.1357253 | -1.5006283 |
| C | 3.0404418  | -0.7856912 | -1.7209107 |
| N | 2.0979534  | -1.7511433 | -1.5883515 |
| H | 3.9104844  | -4.4189876 | -0.7614812 |
| H | 5.1288652  | -0.3743541 | -1.6070650 |
| C | 1.2103437  | -3.9849457 | -1.1431862 |
| H | 1.3483000  | -4.8212550 | -1.8351201 |
| H | 1.1580981  | -4.3990349 | -0.1312518 |
| H | 0.2666311  | -3.4887419 | -1.3668367 |
| C | 2.5888055  | 0.5927515  | -2.0868264 |
| H | 1.5098766  | 0.6329816  | -2.2328748 |
| H | 2.8671125  | 1.2951793  | -1.2949269 |
| H | 3.0839988  | 0.9147095  | -3.0079132 |
| H | 1.1071754  | -1.4755133 | -1.7173157 |
| C | 6.1364763  | -2.8174984 | -0.8696113 |
| H | 6.8252202  | -2.1955504 | -1.4466433 |
| H | 6.3576139  | -2.6608306 | 0.1938707  |
| H | 6.3206638  | -3.8707237 | -1.0953446 |

**cTS1** : TS for H<sub>2</sub>-cleavage with Col.B(C<sub>6</sub>F<sub>5</sub>)<sub>3</sub>  
56

Energy = -2577.168759118

|   |            |            |            |
|---|------------|------------|------------|
| B | -0.3191856 | 0.7691643  | -0.1023412 |
| C | -0.2462922 | 1.1204138  | 1.4382533  |
| C | 0.0376129  | 1.9150591  | -1.1323746 |
| C | -1.0604009 | -0.5435414 | -0.5666138 |
| C | -1.3033013 | 0.8726990  | 2.3202782  |
| C | 0.8770571  | 1.7299217  | 2.0085736  |
| C | 0.6621844  | 1.6686673  | -2.3619137 |
| C | -0.2506223 | 3.2615334  | -0.8730401 |
| C | -0.9904503 | -1.7279370 | 0.1836505  |
| C | -1.8077201 | -0.6377801 | -1.7488834 |
| C | -1.2560076 | 1.1880919  | 3.6733870  |
| F | -2.4522091 | 0.3241712  | 1.8650890  |
| C | 0.9740924  | 2.0391948  | 3.3601053  |
| F | 1.9478267  | 2.0259923  | 1.2379863  |
| C | 1.0021264  | 2.6696025  | -3.2622578 |
| F | 0.9804009  | 0.4045794  | -2.7110738 |
| C | 0.0559311  | 4.2910789  | -1.7570001 |
| F | -0.8885922 | 3.6193181  | 0.2638292  |
| C | -1.5692757 | -2.9253236 | -0.2160505 |
| F | -0.3241137 | -1.7485429 | 1.3556569  |

|   |            |            |            |
|---|------------|------------|------------|
| C | -2.4137634 | -1.8147585 | -2.1769858 |
| F | -1.9940323 | 0.4454634  | -2.5321126 |
| C | -0.1047314 | 1.7693317  | 4.1984764  |
| F | -2.3041170 | 0.9393632  | 4.4771672  |
| F | 2.0875008  | 2.6005829  | 3.8622656  |
| C | 0.6927085  | 3.9933052  | -2.9578617 |
| F | 1.6156624  | 2.3769013  | -4.4215631 |
| F | -0.2590750 | 5.5647711  | -1.4657826 |
| C | -2.2851503 | -2.9691763 | -1.4098513 |
| F | -1.4505794 | -4.0335931 | 0.5327610  |
| F | -3.1209072 | -1.8483916 | -3.3191018 |
| F | -0.0378990 | 2.0737903  | 5.5010075  |
| F | 1.0006078  | 4.9713462  | -3.8186203 |
| F | -2.8522623 | -4.1126743 | -1.8126732 |
| H | 1.4445110  | 0.1484437  | -0.1904038 |
| H | 1.6495910  | -0.6084160 | -0.2034677 |
| N | 2.2309676  | -2.4432710 | -0.1899748 |
| C | 1.8562713  | -3.3671424 | -1.0957647 |
| C | 2.6200484  | -2.8386732 | 1.0367575  |
| C | 1.8526444  | -4.7287246 | -0.7901686 |
| C | 1.4441922  | -2.8640000 | -2.4526607 |
| C | 2.6467804  | -4.1872133 | 1.3958436  |
| C | 3.0035604  | -1.7552597 | 2.0098414  |
| C | 2.2526302  | -5.1631517 | 0.4768627  |
| H | 1.5328268  | -5.4463040 | -1.5412366 |
| H | 2.2808592  | -2.3499691 | -2.9377731 |
| H | 1.1167253  | -3.6853090 | -3.0943382 |
| H | 0.6321612  | -2.1368561 | -2.3621757 |
| H | 2.9645623  | -4.4706490 | 2.3957733  |
| H | 2.1180544  | -1.1770274 | 2.2977266  |
| H | 3.4479261  | -2.1776750 | 2.9139730  |
| H | 3.7144407  | -1.0611535 | 1.5514497  |
| C | 2.2787995  | -6.6266487 | 0.8283717  |
| H | 1.4962770  | -7.1746005 | 0.2955211  |
| H | 3.2427715  | -7.0667750 | 0.5434412  |
| H | 2.1502169  | -6.7777980 | 1.9037929  |

**cTS2** : CO<sub>2</sub>-reduction with [ColH][HB(C<sub>6</sub>F<sub>5</sub>)<sub>3</sub>]  
59

Energy = -2765.892615632

|   |            |            |            |
|---|------------|------------|------------|
| B | -0.9362211 | -0.0666883 | -0.1698801 |
| C | -1.5318352 | 0.0339779  | 1.3206082  |
| C | -1.9653793 | -0.0649151 | -1.3884921 |
| C | 0.3998092  | -0.9608281 | -0.2541852 |
| C | -1.6382823 | -1.1037249 | 2.1241525  |
| C | -1.9800710 | 1.2142763  | 1.9132085  |
| C | -1.5208170 | 0.1641067  | -2.6956666 |
| C | -3.3523409 | -0.1890317 | -1.2596043 |
| C | 1.4385622  | -0.7501885 | 0.6596623  |
| C | 0.6200910  | -2.0142271 | -1.1480567 |
| C | -2.1307775 | -1.0852460 | 3.4246975  |

F -1.2764483 -2.3162645 1.6320042  
 C -2.4699679 1.2823108 3.2142678  
 F -1.9534695 2.3761090 1.2186701  
 C -2.3598341 0.2655088 -3.7955419  
 F -0.1933761 0.3086953 -2.9334171  
 C -4.2316066 -0.1021737 -2.3363229  
 F -3.9194045 -0.4312829 -0.0543014  
 C 2.6186397 -1.4839499 0.6776640  
 F 1.3293439 0.2296000 1.5919837  
 C 1.7933484 -2.7657141 -1.1747446  
 F -0.3333074 -2.3816513 -2.0314649  
 C -2.5457809 0.1221585 3.9778043  
 F -2.2154814 -2.2178882 4.1495145  
 F -2.8765391 2.4549957 3.7381927  
 C -3.7333086 0.1304531 -3.6132751  
 F -1.8661642 0.4950476 -5.0274634  
 F -5.5585466 -0.2461296 -2.1541939  
 C 2.8052944 -2.4948557 -0.2596765  
 F 3.5847500 -1.2196698 1.5796660  
 F 1.9539124 -3.7587450 -2.0686154  
 F -3.0218793 0.1656554 5.2334918  
 F -4.5674086 0.2196445 -4.6612034  
 F 3.9475897 -3.2002071 -0.2764791  
 H -0.3679651 1.2445302 -0.4074927  
 C 4.1907606 2.0352191 1.0239592  
 C 5.4859020 1.5660166 1.1723778  
 C 6.0748553 0.7670111 0.1841751  
 C 5.3234275 0.4651465 -0.9583232  
 C 4.0321425 0.9471143 -1.1031586  
 N 3.5149902 1.7065291 -0.1057621  
 H 6.0315528 1.8170992 2.0754268  
 H 5.7405183 -0.1550380 -1.7443509  
 C 3.4773045 2.8749542 2.0350884  
 H 4.1415939 3.1039009 2.8688121  
 H 3.1302176 3.8093217 1.5826218  
 H 2.5970387 2.3457000 2.4137400  
 C 3.1691663 0.6882356 -2.2969737  
 H 3.0967774 1.5915728 -2.9131374  
 H 3.5954435 -0.1114741 -2.9037065  
 H 2.1557569 0.4102266 -1.9965070  
 H 2.5275549 2.0526867 -0.2040053  
 O 1.0510406 2.7534485 -0.3426736  
 C -0.0301077 2.4358827 -0.8430119  
 O -0.8703265 2.8743757 -1.5882341  
 C 7.4794995 0.2617783 0.3382280  
 H 8.1835636 1.0152430 -0.0370921  
 H 7.7197222 0.0795264 1.3888105  
 H 7.6356068 -0.6551498 -0.2350149

C : adduct SiMe<sub>3</sub>OCHOB(C<sub>6</sub>F<sub>5</sub>)<sub>3</sub>

51

Energy = -2808.248859059  
 B 0.1293319 -0.1292221 -0.1417427  
 C 1.0676302 -1.2159297 -0.9091872  
 C 0.0214233 1.3242659 -0.8741860  
 C 0.3898539 -0.0276338 1.4644429  
 C 1.0155524 -2.5701407 -0.5632186  
 C 2.0060578 -0.9094033 -1.8972459  
 C -0.6633987 1.4805304 -2.0811560  
 C 0.5627601 2.5066044 -0.3652623  
 C -0.5361932 0.6219288 2.2870496  
 C 1.5013595 -0.5343493 2.1400337  
 C 1.8010781 -3.5579826 -1.1423608  
 F 0.1527092 -2.9748642 0.4092277  
 C 2.8221869 -1.8643475 -2.5023057  
 F 2.1933886 0.3654424 -2.3106649  
 C -0.8527137 2.6977867 -2.7238213  
 F -1.1744988 0.3877446 -2.7192018  
 C 0.4083924 3.7492984 -0.9762920  
 F 1.3038196 2.4989217 0.7684981  
 C -0.4127064 0.7295459 3.6671942  
 F -1.6229848 1.2273939 1.7408253  
 C 1.6710052 -0.4452849 3.5206196  
 F 2.5135381 -1.1367267 1.4689556  
 C 2.7183094 -3.1984320 -2.1261201  
 F 1.6939726 -4.8436507 -0.7605639  
 F 3.7107919 -1.5065407 -3.4468721  
 C -0.3119342 3.8496048 -2.1612329  
 F -1.5353924 2.7706123 -3.8822318  
 F 0.9516460 4.8535629 -0.4317858  
 C 0.7036136 0.1848808 4.2938672  
 F -1.3504409 1.3637567 4.3974837  
 F 2.7642936 -0.9637910 4.1113391  
 F 3.4928265 -4.1289491 -2.7029079  
 F -0.4714749 5.0388853 -2.7622620  
 F 0.8488311 0.2770618 5.6251871  
 O -1.3954322 -0.6576012 -0.1900116  
 C -1.8602223 -1.5061261 -0.9896140  
 H -1.2211489 -2.0585914 -1.6801889  
 O -3.1135284 -1.7733083 -1.0418622  
 Si -4.3935752 -0.9321584 -0.1381949  
 C -4.2675489 0.8646261 -0.6139654  
 H -5.1451058 1.4022097 -0.2345766  
 H -3.3736292 1.3348901 -0.1959004  
 H -4.2520150 0.9818896 -1.7034680  
 C -5.9049909 -1.7704793 -0.8238709  
 H -6.8058809 -1.3533530 -0.3583388  
 H -5.9848449 -1.6221934 -1.9064109  
 H -5.8881546 -2.8471539 -0.6219462  
 C -4.1041428 -1.2935697 1.6648196  
 H -3.9864911 -2.3694619 1.8353741  
 H -3.2188757 -0.7768429 2.0438062



H -4.9701560 -0.9560658 2.2471566

**D.SiMe<sub>3</sub>I** : loose complex of **D** and SiMe<sub>3</sub>I  
31

Energy = -1305.740022902

O -2.8198050 0.9721130 -0.0846617  
Si -3.9521574 -0.3139387 0.0576269  
C -3.0693199 2.2811014 -0.2196922  
C -4.1666163 -0.6295508 1.8863718  
C -5.5619664 0.1812105 -0.7587044  
C -3.1284251 -1.7403851 -0.8171495  
H -4.1381024 2.5351649 -0.3172339  
O -2.1921263 3.1160189 -0.2393976  
H -4.8541251 -1.4678799 2.0528907  
H -3.2111182 -0.8793986 2.3613070  
H -4.5800804 0.2497365 2.3942496  
H -6.2468786 -0.6760353 -0.7549987  
H -6.0632634 1.0020437 -0.2333826  
H -5.4105481 0.4805770 -1.8022980  
H -2.9546193 -1.5130744 -1.8747661  
H -2.1642281 -1.9831353 -0.3573729  
H -3.7613687 -2.6344102 -0.7624984  
Si 1.1219378 0.3591886 -0.0203943  
C 0.1935306 -0.3685723 1.4344766  
C 0.3771121 -0.1325300 -1.6664548  
C 1.3218129 2.2111686 0.1297822  
H -0.8141171 0.0628252 1.4621688  
H 0.1061014 -1.4569104 1.3497471  
H 0.6964603 -0.1359719 2.3787630  
H -0.6315537 0.2918909 -1.7413842  
H 0.9773706 0.2512218 -2.4979737  
H 0.3044326 -1.2203260 -1.7662437  
H 1.7702105 2.4875863 1.0897991  
H 1.9528178 2.6065380 -0.6732498  
H 0.3303921 2.6765359 0.0556517  
I 3.4267775 -0.6431706 0.0444365

**D** : neutral SiMe<sub>3</sub>OCHO

17

Energy = -598.7069922209

O -2.1145777 0.7413448 0.5518487  
C -1.9584320 -0.3800070 0.1080530  
H -2.7844392 -1.0836358 -0.0730816  
O -0.7827761 -0.9232553 -0.2228867  
Si 0.7215577 -0.0759198 -0.0586141  
C 0.9945525 0.3309059 1.7450187  
H 1.9948696 0.7595828 1.8846362  
H 0.2578841 1.0555591 2.1051377  
H 0.9270994 -0.5700081 2.3659618  
C 1.9454792 -1.3456372 -0.6758721  
H 2.9660620 -0.9465961 -0.6300660

H 1.9126124 -2.2563799 -0.0669215  
H 1.7387070 -1.6225682 -1.7159868  
C 0.6868034 1.4413938 -1.1493420  
H 0.4425513 1.1764288 -2.1846560  
H -0.0499202 2.1688545 -0.7951189  
H 1.6725206 1.9233864 -1.1510373

**eC** : adduct SiEt<sub>3</sub>OCHO(C<sub>6</sub>F<sub>5</sub>)<sub>3</sub>

60

Energy = -2926.249880280

B 0.1862214 -0.0467077 -0.1363734  
C 1.0426466 -1.1616884 -0.9620984  
C 0.2954706 1.4615994 -0.7418750  
C 0.3580040 -0.1206096 1.4832820  
C 0.8037226 -2.5292578 -0.7921171  
C 2.0892908 -0.8693157 -1.8406220  
C -0.2760977 1.7912905 -1.9714939  
C 0.9467664 2.5223229 -0.1095204  
C -0.5090665 0.6084866 2.3037145  
C 1.3020638 -0.8796223 2.1760531  
C 1.5042176 -3.5372322 -1.4409050  
F -0.1710902 -2.9339585 0.0703617  
C 2.8267147 -1.8454492 -2.5097729  
F 2.4683798 0.4081627 -2.0759366  
C -0.2648921 3.0652799 -2.5258333  
F -0.8740688 0.8212316 -2.7224899  
C 0.9948566 3.8143984 -0.6280470  
F 1.6016663 2.3350672 1.0614459  
C -0.4942641 0.5607111 3.6918999  
F -1.4184682 1.4490947 1.7466237  
C 1.3611734 -0.9518884 3.5671927  
F 2.2484554 -1.5922311 1.5176410  
C 2.5314130 -3.1891607 -2.3135676  
F 1.2110311 -4.8331748 -1.2298346  
F 3.8237100 -1.4976908 -3.3431863  
C 0.3774665 4.0927198 -1.8424140  
F -0.8516362 3.3096755 -3.7129744  
F 1.6363941 4.7955412 0.0333485  
C 0.4507146 -0.2344605 4.3332208  
F -1.3699107 1.2817793 4.4188160  
F 2.2947025 -1.7086448 4.1746925  
F 3.2280862 -4.1392822 -2.9536917  
F 0.4122380 5.3324799 -2.3555518  
F 0.4907370 -0.2951198 5.6737190  
O -1.3885451 -0.4008729 -0.2814910  
C -1.8892210 -1.1378028 -1.1655689  
H -1.2730457 -1.5860281 -1.9463550  
O -3.1383058 -1.4160193 -1.2137606  
Si -4.4903494 -0.9312747 -0.1691055  
C -5.0466713 0.7301784 -0.8250185  
H -5.8699738 1.0495652 -0.1684903

|   |            |            |            |
|---|------------|------------|------------|
| H | -5.4953317 | 0.5818834  | -1.8158087 |
| C | -5.6974042 | -2.3147869 | -0.5205143 |
| H | -6.5917244 | -2.1224771 | 0.0897222  |
| H | -5.2697645 | -3.2501859 | -0.1344476 |
| C | -3.9341101 | -0.8921937 | 1.6147731  |
| H | -3.3301337 | 0.0051814  | 1.7802740  |
| H | -4.8575593 | -0.7448788 | 2.1957624  |
| C | -3.1932273 | -2.1414730 | 2.1293908  |
| H | -2.9719568 | -2.0456698 | 3.1974801  |
| H | -3.7906474 | -3.0489772 | 1.9945484  |
| H | -2.2419141 | -2.2841954 | 1.6089401  |
| C | -6.0944348 | -2.4872878 | -1.9997729 |
| H | -6.5782405 | -1.5862770 | -2.3909102 |
| H | -5.2183809 | -2.6933906 | -2.6229932 |
| H | -6.7950624 | -3.3200620 | -2.1204237 |
| C | -3.9732606 | 1.8339347  | -0.8947155 |
| H | -3.4818265 | 1.9854036  | 0.0703455  |
| H | -3.2003059 | 1.5828842  | -1.6268255 |
| H | -4.4185519 | 2.7861145  | -1.2005739 |

**eE** : CH<sub>2</sub>(OSiEt<sub>3</sub>)<sub>2</sub>

49

Energy = -1244.724041849

|    |            |            |            |
|----|------------|------------|------------|
| O  | 0.9490115  | 0.5110186  | 0.9221001  |
| Si | 2.1727289  | -0.1199181 | -0.0407287 |
| C  | -0.0333927 | -0.2227083 | 1.6207702  |
| C  | 2.8594603  | 1.3982095  | -0.9125323 |
| C  | 3.4592487  | -0.9290224 | 1.0768716  |
| C  | 1.5599519  | -1.3600362 | -1.3242206 |
| H  | -0.4971966 | 0.4728296  | 2.3314279  |
| H  | 0.4175983  | -1.0643116 | 2.1615613  |
| O  | -0.9997372 | -0.7731719 | 0.7526590  |
| H  | 3.6876202  | 1.0834215  | -1.5634552 |
| H  | 2.0776229  | 1.7792663  | -1.5851722 |
| H  | 3.7759017  | -0.1933945 | 1.8290624  |
| H  | 2.9813167  | -1.7446684 | 1.6383691  |
| H  | 2.3610799  | -1.4574226 | -2.0731766 |
| H  | 0.7096238  | -0.9130205 | -1.8570112 |
| Si | -2.1999492 | 0.0666889  | -0.0696202 |
| C  | -1.5385791 | 1.4823639  | -1.1278004 |
| C  | -2.9530224 | -1.2491934 | -1.1819398 |
| C  | -3.4463104 | 0.7236700  | 1.1849063  |
| H  | -2.3238497 | 1.7206547  | -1.8615802 |
| H  | -0.6902623 | 1.1044726  | -1.7146561 |
| H  | -3.7665723 | -0.7927441 | -1.7637655 |
| H  | -2.1887742 | -1.5439373 | -1.9154476 |
| H  | -3.7846551 | -0.1143258 | 1.8098112  |
| H  | -2.9347300 | 1.4185015  | 1.8663632  |
| C  | -3.4703762 | -2.4960328 | -0.4400063 |
| H  | -2.6657722 | -2.9691409 | 0.1323116  |
| H  | -4.2687769 | -2.2360809 | 0.2645149  |

|   |            |            |            |
|---|------------|------------|------------|
| H | -3.8728739 | -3.2406812 | -1.1366744 |
| C | 4.6901528  | -1.4720159 | 0.3232093  |
| H | 4.4039842  | -2.2304349 | -0.4143260 |
| H | 5.2106915  | -0.6716495 | -0.2150022 |
| H | 5.4108069  | -1.9328578 | 1.0085254  |
| C | -1.1267696 | 2.7642621  | -0.3794498 |
| H | -1.9683723 | 3.1825354  | 0.1842875  |
| H | -0.3148569 | 2.5586176  | 0.3241812  |
| H | -0.7797716 | 3.5369648  | -1.0757403 |
| C | -4.6613795 | 1.4270583  | 0.5468241  |
| H | -5.2188427 | 0.7434020  | -0.1034991 |
| H | -5.3561183 | 1.8000669  | 1.3080935  |
| H | -4.3516403 | 2.2817190  | -0.0652856 |
| C | 1.1724186  | -2.7558431 | -0.8005631 |
| H | 2.0118359  | -3.2338955 | -0.2830562 |
| H | 0.3345347  | -2.6879238 | -0.1005477 |
| H | 0.8702941  | -3.4181069 | -1.6206161 |
| C | 3.3276731  | 2.5234186  | 0.0296178  |
| H | 4.1406931  | 2.1833282  | 0.6813131  |
| H | 3.6938670  | 3.3912005  | -0.5314311 |
| H | 2.5071455  | 2.8587339  | 0.6722658  |

**eF** : CH<sub>3</sub>OSiEt<sub>3</sub>

27

Energy = -642.6215821375

|    |            |            |            |
|----|------------|------------|------------|
| O  | 1.2261842  | 0.2079176  | -0.1364848 |
| Si | 1.7319466  | -0.1775965 | -1.6823042 |
| C  | -0.1321778 | 0.2169528  | 0.3098084  |
| H  | -0.1671485 | 0.7531858  | 1.2626920  |
| H  | -0.5027563 | -0.8039678 | 0.4650257  |
| H  | -0.7867657 | 0.7275426  | -0.4076167 |
| C  | 1.7371119  | -2.0435835 | -1.9700930 |
| C  | 0.3538374  | -2.7192913 | -2.0475982 |
| H  | 2.3352857  | -2.5081415 | -1.1729570 |
| H  | 2.2892225  | -2.2329429 | -2.9030212 |
| H  | 0.4419085  | -3.7928668 | -2.2520760 |
| H  | -0.1982444 | -2.6079653 | -1.1080754 |
| H  | -0.2598277 | -2.2810249 | -2.8429412 |
| C  | 3.4941014  | 0.4738446  | -1.7683659 |
| C  | 3.6148092  | 2.0001056  | -1.5963778 |
| H  | 3.9361428  | 0.1672889  | -2.7272838 |
| H  | 4.0810665  | -0.0369443 | -0.9914741 |
| H  | 4.6613855  | 2.3263828  | -1.6138097 |
| H  | 3.0888020  | 2.5322487  | -2.3974222 |
| H  | 3.1774017  | 2.3207549  | -0.6447998 |
| C  | 0.6190853  | 0.6680686  | -2.9515319 |
| C  | 1.0775453  | 0.4549359  | -4.4087554 |
| H  | 0.5826242  | 1.7431546  | -2.7260053 |
| H  | -0.4107889 | 0.3019483  | -2.8362151 |
| H  | 0.4116667  | 0.9601123  | -5.1178976 |
| H  | 2.0891196  | 0.8453597  | -4.5687003 |

H 1.0921168 -0.6095260 -4.6695855

eG<sup>+</sup> : aa

49

Energy = -1169.853933546

O -0.0030976 -0.3329396 -0.7571960  
 Si -1.6124461 0.3459598 -0.2727975  
 Si 1.6225169 -0.4320552 0.0309257  
 C -0.0596334 -1.0026758 -2.0904991  
 C -1.7520988 1.9532194 -1.2135923  
 C -1.6379044 0.5520352 1.5820045  
 C -2.8659352 -0.9250244 -0.8297449  
 C 2.8526573 0.0615521 -1.2900143  
 C 1.7874847 -2.2181630 0.5464052  
 C 1.6344542 0.7761697 1.4540449  
 H 0.9616783 -1.1194920 -2.4437752  
 H -0.6185400 -0.3541478 -2.7633444  
 H -0.5439150 -1.9686488 -1.9660581  
 H -2.8062126 2.2576163 -1.1393552  
 H -1.5846980 1.7616871 -2.2821922  
 C -0.8429355 3.0972695 -0.7258074  
 H -0.9686595 1.3601263 1.8897723  
 H -1.2891209 -0.3588260 2.0824820  
 C -3.0790730 0.8829232 2.0433557  
 H -3.8387851 -0.4572327 -0.6164624  
 H -2.8436096 -1.0421681 -1.9197486  
 C -2.7932714 -2.2966526 -0.1311855  
 H 3.8218907 0.0740438 -0.7694836  
 H 2.9557308 -0.7244910 -2.0481140  
 C 2.6053835 1.4298154 -1.9533205  
 H 1.6419812 -2.8554001 -0.3367073  
 H 2.8388276 -2.3622716 0.8347555  
 C 0.8625031 -2.6680431 1.6934451  
 H 1.2478035 1.7534657 1.1423994  
 H 0.9861549 0.4196893 2.2599499  
 C 3.0765983 0.9367597 1.9951997  
 H -1.0148318 4.0049123 -1.3119402  
 H -1.0339002 3.3389957 0.3245654  
 H 0.2154162 2.8380801 -0.8246546  
 H -3.7699930 0.0620827 1.8296947  
 H -3.0952441 1.0622813 3.1221530  
 H -3.4626111 1.7834340 1.5517338  
 H -2.8634975 -2.1957036 0.9565680  
 H -3.6131959 -2.9421098 -0.4592601  
 H -1.8561291 -2.8180449 -0.3541895  
 H 3.4027220 1.6660856 -2.6639226  
 H 1.6578268 1.4465957 -2.5025010  
 H 2.5746866 2.2328011 -1.2098634  
 H 1.0306170 -3.7212386 1.9371791  
 H 1.0400162 -2.0835979 2.6015969  
 H -0.1930535 -2.5573945 1.4250062

H 3.7368652 1.3927432 1.2517761

H 3.0752390 1.5785601 2.8808458

H 3.5091122 -0.0269832 2.2852141

O(SiEt<sub>3</sub>)<sub>2</sub> : by-product

45

Energy = -1130.142339587

O 0.0003007 -0.0031113 -0.0876056  
 Si 1.6318633 0.1847553 -0.0839185  
 C 2.2494237 -0.0064855 1.6870867  
 C 2.3838663 -1.1410674 -1.1933431  
 C 2.0344603 1.9046443 -0.7428299  
 H 3.3489722 0.0236492 1.6771642  
 H 1.9310165 0.8715871 2.2668241  
 H 3.4660942 -0.9593789 -1.2691506  
 H 2.2776339 -2.1156907 -0.6961599  
 H 1.8147350 1.9279381 -1.8197352  
 H 3.1190138 2.0656365 -0.6546832  
 Si -1.6318935 -0.1853825 -0.0841669  
 C -2.2492327 0.0075036 1.6867300  
 C -2.3808172 1.1421509 -1.1936632  
 C -2.0383215 -1.9043135 -0.7432090  
 H -1.9331940 -0.8714146 2.2664735  
 H -3.3488537 -0.0197270 1.6766011  
 H -3.4633900 0.9624259 -1.2694025  
 H -2.2729019 2.1166224 -0.6965626  
 H -3.1231739 -2.0633226 -0.6552687  
 H -1.8183742 -1.9279054 -1.8200714  
 C -1.7590348 1.2104424 -2.6017542  
 H -0.6841461 1.4112091 -2.5444365  
 H -1.8867800 0.2647353 -3.1406064  
 H -2.2159262 2.0015414 -3.2077274  
 C 1.7620612 -1.2105915 -2.6013748  
 H 0.6874844 -1.4130162 -2.5439204  
 H 1.8882966 -0.2647802 -3.1404075  
 H 2.2201416 -2.0010727 -3.2072594  
 C -1.7610384 1.2896897 2.3879324  
 H -2.1335864 1.3548586 3.4168741  
 H -0.6671621 1.3216794 2.4252751  
 H -2.0964136 2.1876383 1.8565979  
 C -1.2800911 -3.0450451 -0.0376833  
 H -1.5121761 -3.0762985 1.0329025  
 H -1.5360127 -4.0233161 -0.4610919  
 H -0.1974383 -2.9115737 -0.1334389  
 C 1.2741107 3.0439555 -0.0373277  
 H 1.5056810 3.0752940 1.0333635  
 H 1.5286434 4.0227473 -0.4603619  
 H 0.1917148 2.9088912 -0.1335580  
 C 1.7644525 -1.2899813 2.3881401  
 H 2.1364909 -1.3539262 3.4173429  
 H 0.6706486 -1.3252010 2.4246866

H 2.1028527 -2.1869938 1.8571463

SiEt<sub>3</sub>I : electrophilic silane

23

Energy = -825.0340619176

I -0.0011121 -0.0014854 1.3179177  
 Si -0.0005620 -0.0000963 -1.1938974  
 C 0.0513489 1.8007071 -1.7352649  
 C 1.5326727 -0.9452630 -1.7366546  
 C -1.5856133 -0.8548280 -1.7375907  
 H -0.0453412 1.7964975 -2.8321762  
 H -0.8459331 2.3025570 -1.3513178  
 H 1.5734424 -0.8642421 -2.8340867  
 H 2.4164756 -0.4162484 -1.3579605  
 H -1.5706913 -1.8844143 -1.3579762  
 H -1.5343979 -0.9318080 -2.8348521  
 C 1.3121593 2.5780746 -1.3186519  
 H 1.2642271 3.6176131 -1.6611027  
 H 1.4229080 2.5864741 -0.2288617  
 H 2.2161747 2.1279669 -1.7422685  
 C 1.5790575 -2.4240333 -1.3138347  
 H 2.5015410 -2.9032133 -1.6597389  
 H 1.5375033 -2.5192700 -0.2233624  
 H 0.7351268 -2.9844702 -1.7299288  
 C -2.8894110 -0.1542425 -1.3172093  
 H -3.7656011 -0.7126388 -1.6647021  
 H -2.9529755 -0.0704728 -0.2269186  
 H -2.9509990 0.8568362 -1.7336468

**E** : CH<sub>2</sub>(OSiMe<sub>3</sub>)<sub>2</sub>

31

Energy = -1008.723462219

O 0.7148240 0.3692961 0.8462215  
 Si 2.1515984 0.1041140 0.0120774  
 C -0.0727421 -0.6872228 1.3695713  
 C 2.6152393 1.7865122 -0.6634808  
 C 3.4506440 -0.5261095 1.2148132  
 C 1.9017709 -1.1508950 -1.3606874  
 H -0.5662799 -0.2977565 2.2678047  
 H 0.5465329 -1.5548864 1.6298234  
 O -1.0344572 -1.1406452 0.4396825  
 H 3.5719149 1.7402941 -1.1980691  
 H 1.8564960 2.1540666 -1.3639693  
 H 2.7157153 2.5208644 0.1441564  
 H 4.4106337 -0.6764858 0.7051694  
 H 3.6099028 0.1861417 2.0329716  
 H 3.1589777 -1.4872491 1.6559030  
 H 1.5210299 -2.0997676 -0.9650519  
 H 1.1848156 -0.7890170 -2.1050622  
 H 2.8506987 -1.3565220 -1.8720286  
 Si -2.2002351 -0.1283077 -0.2295844

C -3.5842892 -1.2868014 -0.7327413  
 C -2.7720854 1.1168041 1.0554394  
 C -1.5315856 0.7692823 -1.7364287  
 H -3.2207678 -2.0481983 -1.4332252  
 H -4.0077045 -1.8019760 0.1372733  
 H -4.3933319 -0.7358649 -1.2279897  
 H -1.9528708 1.7801557 1.3568137  
 H -3.5734084 1.7439832 0.6453604  
 H -3.1613054 0.6227621 1.9536701  
 H -2.3210366 1.3680473 -2.2085391  
 H -0.7135364 1.4423780 -1.4594280  
 H -1.1551576 0.0630034 -2.4854893

**E**<sup>+</sup> : cation HC(OSiMe<sub>3</sub>)<sub>2</sub><sup>+</sup>

30

Energy = -1007.936208311

O 0.5722660 -0.1164383 0.0624155  
 Si 2.3316073 0.2143804 -0.0270354  
 C -0.0675469 -0.9082342 0.8247857  
 C 2.4023032 2.0283404 0.3565900  
 C 3.1327268 -0.8804180 1.2434122  
 C 2.7126378 -0.2300603 -1.7872298  
 H 0.4529665 -1.5273215 1.5595730  
 O -1.3276829 -1.0195117 0.7713131  
 H 3.4404546 2.3760687 0.2941635  
 H 1.8104917 2.6109370 -0.3578058  
 H 2.0384085 2.2379337 1.3683472  
 H 4.2159469 -0.7084950 1.2130223  
 H 2.7967347 -0.6549939 2.2617707  
 H 2.9669201 -1.9443680 1.0396959  
 H 2.5603798 -1.2986742 -1.9733163  
 H 2.0900587 0.3408394 -2.4847240  
 H 3.7615802 0.0037416 -2.0055680  
 Si -2.4726025 -0.1386420 -0.3088094  
 C -4.0900326 -0.7984910 0.3123679  
 C -2.2027188 1.6688608 0.0365718  
 C -2.0256912 -0.6841291 -2.0291277  
 H -4.1435357 -1.8871324 0.2035153  
 H -4.2457431 -0.5449973 1.3665283  
 H -4.9126960 -0.3605707 -0.2655622  
 H -1.2365589 2.0235140 -0.3344963  
 H -2.9876224 2.2448668 -0.4692901  
 H -2.2729380 1.8839713 1.1085243  
 H -2.7617689 -0.2778625 -2.7338002  
 H -1.0380367 -0.3225302 -2.3323177  
 H -2.0468410 -1.7756974 -2.1183607

**F**.SiMe<sub>3</sub>I : loose complex of **F** and SiMe<sub>3</sub>I

32

Energy = -1231.659538256

O 2.7421157 0.5379029 0.7096414

|    |            |            |            |
|----|------------|------------|------------|
| C  | 3.1218373  | 0.2776518  | 2.0639947  |
| H  | 3.1728204  | -0.8012857 | 2.2583172  |
| H  | 4.0935688  | 0.7282527  | 2.3035503  |
| H  | 2.3633155  | 0.7199199  | 2.7158446  |
| Si | 3.7662643  | 0.2388713  | -0.5814787 |
| C  | 2.7734143  | 0.7037260  | -2.0982144 |
| C  | 4.2532917  | -1.5764352 | -0.6169635 |
| C  | 5.3098298  | 1.3005593  | -0.4327974 |
| H  | 3.3742887  | 0.5673828  | -3.0056807 |
| H  | 1.8764366  | 0.0821871  | -2.1932721 |
| H  | 2.4570825  | 1.7521964  | -2.0578915 |
| H  | 4.7979776  | -1.8661695 | 0.2898868  |
| H  | 3.3756978  | -2.2273881 | -0.7065121 |
| H  | 4.9088924  | -1.7797880 | -1.4730133 |
| H  | 5.8889715  | 1.0539526  | 0.4652703  |
| H  | 5.9662508  | 1.1468079  | -1.2985756 |
| H  | 5.0544428  | 2.3659703  | -0.3893949 |
| C  | -0.9784461 | -0.3133685 | 2.3688317  |
| C  | -0.5275555 | 1.3952999  | -0.1842474 |
| C  | -0.0276267 | -1.6807904 | -0.2447325 |
| H  | 0.0518604  | -0.1645835 | 2.7159100  |
| H  | -1.6013354 | 0.4802909  | 2.7939336  |
| H  | -1.3333248 | -1.2752054 | 2.7529398  |
| H  | -0.6151022 | 1.4216843  | -1.2752080 |
| H  | -1.1542477 | 2.1901723  | 0.2331368  |
| H  | 0.5187706  | 1.5846875  | 0.0854714  |
| H  | -0.3757371 | -2.6496884 | 0.1273275  |
| H  | -0.0948874 | -1.6853030 | -1.3373618 |
| H  | 1.0241144  | -1.5529755 | 0.0381981  |
| Si | -1.0174353 | -0.2755527 | 0.4961885  |
| I  | -3.4103913 | -0.6595008 | -0.1682398 |

**F** : product CH<sub>3</sub>OSiMe<sub>3</sub>

18

Energy = -524.6226891580

|    |            |            |            |
|----|------------|------------|------------|
| O  | 1.3030419  | -1.1342065 | -1.1048727 |
| Si | 2.5226214  | -2.0448298 | -0.4105516 |
| C  | -0.0365482 | -1.1295752 | -0.5979839 |
| C  | 2.0811956  | -3.8716795 | -0.4692175 |
| C  | 4.0343898  | -1.6809663 | -1.4530500 |
| C  | 2.7881499  | -1.5194342 | 1.3753584  |
| H  | -0.0669551 | -0.7737600 | 0.4398867  |
| H  | -0.4813758 | -2.1319249 | -0.6442836 |
| H  | -0.6262838 | -0.4520183 | -1.2213016 |
| H  | 2.8965871  | -4.4797659 | -0.0575908 |
| H  | 1.1807776  | -4.0902071 | 0.1177209  |
| H  | 1.9020801  | -4.2027559 | -1.4991706 |
| H  | 4.9047940  | -2.2354017 | -1.0812167 |
| H  | 3.8720721  | -1.9706191 | -2.4978210 |
| H  | 4.2809701  | -0.6130230 | -1.4308608 |
| H  | 3.0289863  | -0.4517296 | 1.4422268  |

|   |           |            |           |
|---|-----------|------------|-----------|
| H | 1.8987050 | -1.7045837 | 1.9899328 |
| H | 3.6183695 | -2.0801014 | 1.8230649 |

**F**<sup>+</sup> : cation SiMe<sub>3</sub>OCH<sub>2</sub>O(SiMe<sub>3</sub>)<sub>2</sub><sup>+</sup>

44

Energy = -1417.953343650

|    |            |            |            |
|----|------------|------------|------------|
| O  | 1.6243761  | 0.4653321  | -1.0879704 |
| C  | 3.0690538  | 0.8533055  | -0.6646248 |
| H  | 3.0037339  | 0.9564838  | 0.4183453  |
| O  | 3.9248655  | -0.0898533 | -1.1087020 |
| Si | 4.6482293  | -1.3653393 | -0.2112040 |
| C  | 5.2083137  | -0.6596447 | 1.4267495  |
| H  | 4.3756772  | -0.3368258 | 2.0622369  |
| H  | 5.7572832  | -1.4278519 | 1.9849585  |
| H  | 5.8808971  | 0.1934894  | 1.2828837  |
| C  | 3.4103713  | -2.7490827 | 0.0199261  |
| H  | 3.8939978  | -3.5794617 | 0.5493027  |
| H  | 2.5438668  | -2.4479946 | 0.6178786  |
| H  | 3.0482690  | -3.1345597 | -0.9386921 |
| C  | 6.0604636  | -1.8782905 | -1.3094614 |
| H  | 5.6982838  | -2.2036756 | -2.2914840 |
| H  | 6.7639422  | -1.0522209 | -1.4607460 |
| H  | 6.6098845  | -2.7146585 | -0.8617003 |
| H  | 3.2279995  | 1.8077098  | -1.1638628 |
| Si | 1.4198264  | 0.2572442  | -2.8687243 |
| C  | 1.6946708  | -1.5415753 | -3.2451574 |
| C  | 2.6740129  | 1.3805069  | -3.6599579 |
| C  | -0.3066151 | 0.8329393  | -3.2627976 |
| H  | 1.4645899  | -1.7164492 | -4.3035855 |
| H  | 2.7362506  | -1.8282823 | -3.0757984 |
| H  | 1.0482405  | -2.1967682 | -2.6538207 |
| H  | 2.5287617  | 2.4293177  | -3.3790602 |
| H  | 3.7056223  | 1.0878671  | -3.4457520 |
| H  | 2.5272983  | 1.3122303  | -4.7457052 |
| H  | -0.4436601 | 1.8937939  | -3.0318534 |
| H  | -0.4319599 | 0.7135679  | -4.3473353 |
| H  | -1.1031571 | 0.2584772  | -2.7832881 |
| C  | 1.1836751  | 0.1500054  | 1.8008618  |
| C  | -0.7271000 | 1.7877582  | 0.0552989  |
| C  | -0.5239780 | -1.3271327 | -0.2787118 |
| H  | 1.9253788  | -0.6516843 | 1.8640362  |
| H  | 1.6423573  | 1.0899544  | 2.1243485  |
| H  | 0.3956347  | -0.0871625 | 2.5281151  |
| H  | -1.3425434 | 1.8326670  | -0.8463282 |
| H  | -1.4013159 | 1.7898711  | 0.9209491  |
| H  | -0.1179206 | 2.6971828  | 0.1085676  |
| H  | -1.3165401 | -1.4846546 | 0.4640177  |
| H  | -0.9982264 | -1.3286503 | -1.2636281 |
| H  | 0.1593938  | -2.1803556 | -0.2187353 |
| Si | 0.3380434  | 0.2668020  | 0.1439853  |

**G<sup>+</sup> : cation CH<sub>3</sub>O(SiMe<sub>3</sub>)<sub>2</sub><sup>+</sup>**

31

Energy = -933.8513426050

|    |            |            |            |
|----|------------|------------|------------|
| O  | 1.1868794  | -0.3095876 | -1.0251552 |
| C  | 2.4874511  | -0.1478842 | -0.3123320 |
| Si | 1.2789590  | 0.1365535  | -2.7693034 |
| Si | -0.2866529 | -0.4493726 | 0.0133887  |
| H  | 2.6380373  | -1.0321524 | 0.3011842  |
| H  | 2.4439318  | 0.7622236  | 0.2841092  |
| H  | 3.2651024  | -0.0759837 | -1.0702966 |
| C  | -0.4089387 | -0.1384971 | -3.4918442 |
| C  | 2.5343616  | -1.0315007 | -3.4887480 |
| C  | 1.7860774  | 1.9252943  | -2.7644902 |
| C  | 0.3484160  | -0.9342881 | 1.6926788  |
| C  | -1.3225413 | -1.8009600 | -0.7304900 |
| C  | -1.0415364 | 1.2499511  | -0.0026653 |
| H  | -0.3545185 | 0.2254118  | -4.5268907 |
| H  | -0.6815137 | -1.1965023 | -3.5315097 |
| H  | -1.2065393 | 0.4222660  | -2.9974193 |
| H  | 3.5591133  | -0.8397721 | -3.1566735 |
| H  | 2.2804641  | -2.0727301 | -3.2616613 |
| H  | 2.5186931  | -0.9161343 | -4.5799043 |
| H  | 2.7606687  | 2.0877388  | -2.2927362 |
| H  | 1.8604443  | 2.2760489  | -3.8010805 |
| H  | 1.0443395  | 2.5494659  | -2.2543077 |
| H  | 0.8701862  | -1.8969981 | 1.6836103  |
| H  | 0.9954686  | -0.1816771 | 2.1527439  |
| H  | -0.5317942 | -1.0473395 | 2.3391348  |
| H  | -2.0200352 | -2.1433967 | 0.0445997  |
| H  | -1.9144532 | -1.4805946 | -1.5900370 |
| H  | -0.7088123 | -2.6605618 | -1.0212886 |
| H  | -1.3765495 | 1.5598636  | -0.9972881 |
| H  | -1.9186128 | 1.2547160  | 0.6562747  |
| H  | -0.3384712 | 1.9995988  | 0.3772355  |

**H<sub>2</sub> : dihydrogen**

2

Energy = -1.180052220925

|   |           |           |           |
|---|-----------|-----------|-----------|
| H | 0.0279549 | 0.0000000 | 0.0000000 |
| H | 0.7720451 | 0.0000000 | 0.0000000 |

**I<sup>-</sup> : anion iodide**

1

Energy = -297.7563068331

|   |           |           |           |
|---|-----------|-----------|-----------|
| I | 0.0000000 | 0.0000000 | 0.0000000 |
|---|-----------|-----------|-----------|

**Lut.B(C<sub>6</sub>F<sub>5</sub>)<sub>3</sub> : adduct of 2,6-lutidine**

51

Energy = -2536.666799414

|   |            |            |           |
|---|------------|------------|-----------|
| B | -0.1545118 | -0.1063172 | 0.4286344 |
| C | 0.4711989  | 1.3926875  | 0.1298294 |

|   |            |            |            |
|---|------------|------------|------------|
| C | 1.0378626  | -1.0335033 | -0.2605125 |
| C | -1.6654215 | -0.3347050 | -0.1948901 |
| C | -0.0727155 | 2.3615665  | -0.7172839 |
| C | 1.7699393  | 1.6879764  | 0.5636998  |
| C | 1.9862915  | -1.8363156 | 0.3768611  |
| C | 1.2712178  | -0.8720463 | -1.6328568 |
| C | -2.7314197 | 0.4115314  | 0.3182602  |
| C | -2.0541257 | -1.2489230 | -1.1792486 |
| C | 0.5952874  | 3.5306457  | -1.0837472 |
| F | -1.3033727 | 2.2165017  | -1.2609269 |
| C | 2.4722786  | 2.8374967  | 0.2297704  |
| F | 2.4039022  | 0.8285723  | 1.4058896  |
| C | 3.0426628  | -2.4658517 | -0.2791459 |
| F | 1.9374724  | -2.0485618 | 1.7176889  |
| C | 2.3076687  | -1.4795749 | -2.3306343 |
| F | 0.4586263  | -0.0688120 | -2.3630682 |
| C | -4.0521870 | 0.3033480  | -0.0982699 |
| F | -2.4964426 | 1.3402576  | 1.2812974  |
| C | -3.3636258 | -1.3921913 | -1.6360762 |
| F | -1.1696067 | -2.1151376 | -1.7325103 |
| C | 1.8760958  | 3.7764090  | -0.6074540 |
| F | 0.0090799  | 4.4194760  | -1.9076805 |
| F | 3.7095969  | 3.0580689  | 0.7144155  |
| C | 3.2065193  | -2.2920567 | -1.6469001 |
| F | 3.9123040  | -3.2328535 | 0.4079225  |
| F | 2.4528849  | -1.2857985 | -3.6556648 |
| C | -4.3754177 | -0.6096227 | -1.0958309 |
| F | -5.0124251 | 1.0778885  | 0.4421861  |
| F | -3.6584932 | -2.3042970 | -2.5822363 |
| F | 2.5293726  | 4.8983073  | -0.9476690 |
| F | 4.2171488  | -2.8915577 | -2.2971209 |
| F | -5.6416630 | -0.7379774 | -1.5214983 |
| C | -0.2349810 | 0.4547495  | 3.0709357  |
| C | -0.3143997 | 0.0338003  | 4.3985180  |
| C | -0.5485725 | -1.2899148 | 4.7247226  |
| C | -0.7520690 | -2.1792684 | 3.6837091  |
| C | -0.6642107 | -1.7593111 | 2.3610931  |
| N | -0.3483759 | -0.4547867 | 2.0427888  |
| H | -0.5993954 | -1.6127336 | 5.7594743  |
| H | -0.2029328 | 0.7848397  | 5.1720583  |
| H | -0.9824299 | -3.2213520 | 3.8725366  |
| C | -0.0716008 | 1.9409313  | 2.8886792  |
| H | -0.4878195 | 2.4219279  | 3.7766837  |
| H | 0.9840133  | 2.2206175  | 2.8356372  |
| H | -0.5806530 | 2.3293547  | 2.0136030  |
| C | -0.9761223 | -2.7932228 | 1.3182780  |
| H | -0.4028817 | -2.6950993 | 0.4006416  |
| H | -0.7898048 | -3.7810165 | 1.7438200  |
| H | -2.0389963 | -2.7360600 | 1.0580751  |

[LutH][ClB(C<sub>6</sub>F<sub>5</sub>)<sub>3</sub>] : contact ion pair

53

Energy = -2997.549193120

|   |            |            |            |
|---|------------|------------|------------|
| B | -0.2418707 | -0.7212248 | 0.2294848  |
| C | -1.7803330 | -1.0543314 | -0.2100579 |
| C | -0.3159526 | -0.0843539 | 1.7360448  |
| C | 0.6442624  | 0.1417149  | -0.8391634 |
| C | -2.5101916 | -0.3906391 | -1.1991142 |
| C | -2.5145183 | -2.0117816 | 0.4998624  |
| C | 0.1817581  | -0.5827007 | 2.9411166  |
| C | -1.0434246 | 1.1044907  | 1.8703860  |
| C | 0.7153095  | -0.2561057 | -2.1813948 |
| C | 1.4869889  | 1.2084790  | -0.5197025 |
| C | -3.8396326 | -0.6771184 | -1.5013642 |
| F | -1.9552369 | 0.6126078  | -1.9232345 |
| C | -3.8405171 | -2.3335749 | 0.2285493  |
| F | -1.9437610 | -2.6745990 | 1.5346223  |
| C | -0.0280849 | 0.0372448  | 4.1742085  |
| F | 0.9245752  | -1.7151867 | 2.9965783  |
| C | -1.2791398 | 1.7545754  | 3.0741827  |
| F | -1.5426523 | 1.7028191  | 0.7582055  |
| C | 1.5477056  | 0.3304188  | -3.1266164 |
| F | -0.0373602 | -1.2916610 | -2.6212064 |
| C | 2.3465311  | 1.8208305  | -1.4334627 |
| F | 1.5505101  | 1.7071079  | 0.7400280  |
| C | -4.5109189 | -1.6624557 | -0.7880531 |
| F | -4.4848406 | -0.0001539 | -2.4736471 |
| F | -4.4839829 | -3.2773347 | 0.9456312  |
| C | -0.7653316 | 1.2109585  | 4.2472330  |
| F | 0.4859950  | -0.4976898 | 5.3012507  |
| F | -1.9846072 | 2.9026094  | 3.1175365  |
| C | 2.3826214  | 1.3780123  | -2.7478937 |
| F | 1.5784836  | -0.1185259 | -4.3980474 |
| F | 3.1601912  | 2.8223992  | -1.0429262 |
| F | -5.7932225 | -1.9544260 | -1.0684404 |
| F | -0.9746695 | 1.8157902  | 5.4297590  |
| F | 3.2194178  | 1.9390916  | -3.6372918 |
| C | 3.8515353  | -1.8703231 | -2.1290425 |
| C | 4.9360358  | -1.2373622 | -2.7219599 |
| C | 5.6881174  | -0.3237209 | -1.9852511 |
| C | 5.3621852  | -0.0518964 | -0.6587386 |
| C | 4.2747090  | -0.6904486 | -0.0746706 |
| N | 3.5689843  | -1.5609892 | -0.8379966 |
| H | 6.5310891  | 0.1787389  | -2.4480599 |
| H | 5.1761223  | -1.4589101 | -3.7550043 |
| H | 5.9364125  | 0.6556198  | -0.0724851 |
| C | 2.9908854  | -2.8881393 | -2.8052811 |
| H | 2.9541151  | -2.6993555 | -3.8793553 |
| H | 3.4161680  | -3.8868067 | -2.6493500 |
| H | 1.9775790  | -2.8870155 | -2.3967536 |
| C | 3.8470370  | -0.5051846 | 1.3454091  |
| H | 2.8162277  | -0.8306651 | 1.4953715  |

|    |           |            |            |
|----|-----------|------------|------------|
| H  | 4.4921796 | -1.1032778 | 1.9995636  |
| H  | 3.9476497 | 0.5413209  | 1.6390725  |
| H  | 2.7047017 | -1.9698033 | -0.4235794 |
| Cl | 0.7187915 | -2.4568612 | 0.2058384  |

LutHCl : H-bonded chloride

19

Energy = -788.0006558902

|    |            |            |            |
|----|------------|------------|------------|
| C  | 0.6271125  | -1.1977183 | -0.0000718 |
| C  | 2.0179947  | -1.2075884 | -0.0004740 |
| C  | 2.7129600  | -0.0003718 | -0.0008050 |
| C  | 2.0183861  | 1.2070710  | -0.0008432 |
| C  | 0.6274996  | 1.1976512  | -0.0003021 |
| N  | -0.0031334 | 0.0000667  | -0.0001859 |
| H  | 3.7984189  | -0.0005478 | -0.0011072 |
| H  | 2.5421541  | -2.1565800 | -0.0005596 |
| H  | 2.5428621  | 2.1558901  | -0.0016949 |
| C  | -0.2205846 | -2.4330364 | 0.0006477  |
| H  | 0.0039949  | -3.0384998 | -0.8834315 |
| H  | 0.0061952  | -3.0389055 | 0.8838773  |
| H  | -1.2825481 | -2.1770244 | 0.0020609  |
| C  | -0.2198086 | 2.4332377  | 0.0006840  |
| H  | -1.2818546 | 2.1775661  | 0.0022423  |
| H  | 0.0074012  | 3.0391154  | 0.8838004  |
| H  | 0.0047252  | 3.0385435  | -0.8835141 |
| H  | -1.0853972 | 0.0002403  | -0.0003602 |
| Cl | -2.9878277 | 0.0005983  | 0.0000728  |

LutHI : H-bonded iodide

19

Energy = -625.3682660026

|   |            |            |            |
|---|------------|------------|------------|
| C | 0.6495439  | -1.2019220 | 0.0000705  |
| C | 2.0396296  | -1.2082219 | 0.0009810  |
| C | 2.7336131  | -0.0003750 | 0.0017225  |
| C | 2.0400226  | 1.2076997  | 0.0015823  |
| C | 0.6499330  | 1.2018503  | 0.0008783  |
| N | 0.0232237  | 0.0000646  | 0.0001893  |
| H | 3.8190264  | -0.0005513 | 0.0021329  |
| H | 2.5640737  | -2.1569400 | 0.0011783  |
| H | 2.5647794  | 2.1562482  | 0.0018236  |
| C | -0.1974793 | -2.4359127 | -0.0008445 |
| H | 0.0227797  | -3.0365415 | -0.8892174 |
| H | 0.0325280  | -3.0447294 | 0.8793363  |
| H | -1.2609366 | -2.1834404 | 0.0056417  |
| C | -0.1966959 | 2.4361126  | -0.0005205 |
| H | -1.2602209 | 2.1839884  | 0.0082550  |
| H | 0.0351837  | 3.0464070  | 0.8781257  |
| H | 0.0220580  | 3.0350871  | -0.8904017 |
| H | -1.0335362 | 0.0002294  | 0.0004073  |
| I | -3.4189760 | 0.0006550  | -0.0013049 |

LutH<sup>+</sup> : N-protonated 2,6-lutidine

18

Energy = -327.5641472182

|   |            |            |            |
|---|------------|------------|------------|
| C | 1.2082953  | -0.2231259 | -0.0004049 |
| C | 1.2098840  | 1.1650835  | -0.0001935 |
| C | -0.0000980 | 1.8566067  | -0.0002082 |
| C | -1.2100224 | 1.1649811  | -0.0000247 |
| C | -1.2083078 | -0.2232298 | -0.0000901 |
| N | 0.0000202  | -0.8446362 | -0.0004350 |
| H | -0.0001414 | 2.9416855  | -0.0004962 |
| H | 2.1567799  | 1.6919262  | 0.0000902  |
| H | -2.1569672 | 1.6917423  | 0.0003640  |
| C | 2.4372873  | -1.0734474 | -0.0001050 |
| H | 3.0454536  | -0.8510379 | -0.8823461 |
| H | 3.0428496  | -0.8540970 | 0.8847137  |
| H | 2.1904720  | -2.1376680 | -0.0022882 |
| C | -2.4372141 | -1.0736782 | 0.0004479  |
| H | -2.1902870 | -2.1378744 | 0.0020942  |
| H | -3.0445880 | -0.8515963 | 0.8833185  |
| H | -3.0436098 | -0.8541397 | -0.8837521 |
| H | 0.0000698  | -1.8633725 | -0.0007814 |

LutSiMe<sub>3</sub><sup>+</sup> : silylium binding to Lut

30

Energy = -736.3614736019

|    |            |            |           |
|----|------------|------------|-----------|
| Si | 0.2562103  | 0.8609364  | 4.7916675 |
| C  | 0.5507837  | 2.6854870  | 5.0905912 |
| C  | 1.6602234  | -0.0025825 | 3.9219606 |
| C  | -1.3703926 | 0.7965884  | 3.8669104 |
| H  | 0.2374754  | 3.1817051  | 4.1634300 |
| H  | -0.0763799 | 3.0857265  | 5.8943752 |
| H  | 1.5888966  | 2.9619048  | 5.2786429 |
| H  | 1.4472343  | -1.0625111 | 3.7487216 |
| H  | 1.8166512  | 0.4725980  | 2.9459475 |
| H  | 2.5974536  | 0.0685365  | 4.4836202 |
| H  | -2.2323237 | 0.9634141  | 4.5217504 |
| H  | -1.3343188 | 1.6389365  | 3.1646890 |
| H  | -1.5364024 | -0.1111174 | 3.2855235 |
| C  | 0.7515342  | 0.4124358  | 7.5751512 |
| C  | 0.4400443  | -0.0832273 | 8.8352632 |
| C  | -0.5242413 | -1.0697997 | 8.9873757 |
| C  | -1.1054156 | -1.6060056 | 7.8467527 |
| C  | -0.7886001 | -1.1053221 | 6.5899687 |
| N  | 0.0763618  | -0.0415566 | 6.4644983 |
| H  | -0.7793220 | -1.4495547 | 9.9711705 |
| H  | 0.9846312  | 0.3038435  | 9.6888785 |
| H  | -1.7980009 | -2.4375628 | 7.9091484 |
| C  | 1.8773839  | 1.3947501  | 7.4461728 |
| H  | 2.5665337  | 1.2335029  | 8.2777593 |
| H  | 2.4319506  | 1.2662023  | 6.5149636 |
| H  | 1.5243908  | 2.4277612  | 7.5045598 |

|   |            |            |           |
|---|------------|------------|-----------|
| C | -1.3522203 | -1.7887453 | 5.3798461 |
| H | -2.2958502 | -1.3380630 | 5.0610787 |
| H | -0.6569215 | -1.7775278 | 4.5386263 |
| H | -1.5544367 | -2.8297218 | 5.6403425 |

## Lut : 2,6-lutidine

17

Energy = -327.1230377033

|   |            |            |            |
|---|------------|------------|------------|
| N | -0.0000129 | 0.9540216  | -0.0001969 |
| C | -1.1620199 | 0.2711684  | -0.0001191 |
| C | -1.1998407 | -1.1278645 | -0.0002487 |
| C | -0.0000009 | -1.8339237 | -0.0000068 |
| C | 1.1998293  | -1.1278487 | 0.0002347  |
| C | 1.1620085  | 0.2711889  | -0.0000814 |
| H | 0.0000010  | -2.9205868 | -0.0000970 |
| H | -2.1532889 | -1.6486784 | -0.0008041 |
| H | 2.1532786  | -1.6486602 | 0.0009639  |
| C | -2.4295466 | 1.0871858  | -0.0001735 |
| H | -3.0411209 | 0.8608796  | -0.8813723 |
| H | -3.0386415 | 0.8646235  | 0.8837135  |
| H | -2.1841711 | 2.1509836  | -0.0026978 |
| C | 2.4295473  | 1.0872012  | 0.0002156  |
| H | 2.1842150  | 2.1510123  | 0.0026629  |
| H | 3.0409412  | 0.8608851  | 0.8815427  |
| H | 3.0388225  | 0.8645832  | -0.8835348 |

O(SiMe<sub>3</sub>)<sub>2</sub> : by-product

27

Energy = -894.1373340381

|    |            |            |            |
|----|------------|------------|------------|
| O  | -0.0001432 | 0.0216192  | -0.0218264 |
| Si | -1.6398256 | 0.0057545  | -0.0047195 |
| Si | 1.6395352  | 0.0047135  | -0.0060280 |
| C  | -2.2574285 | 1.7423417  | -0.3660105 |
| C  | -2.2401669 | -1.1890302 | -1.3238337 |
| C  | -2.2159690 | -0.5525169 | 1.6937153  |
| C  | 2.2578337  | 1.7425659  | -0.3599444 |
| C  | 2.2166316  | -0.5616417 | 1.6894026  |
| C  | 2.2382593  | -1.1844500 | -1.3309522 |
| H  | -3.3538740 | 1.7837060  | -0.3657722 |
| H  | -1.8944568 | 2.4523781  | 0.3870965  |
| H  | -1.9085159 | 2.0860510  | -1.3474056 |
| H  | -3.3360911 | -1.2333548 | -1.3527877 |
| H  | -1.8899637 | -0.8843715 | -2.3175783 |
| H  | -1.8679552 | -2.2029520 | -1.1328066 |
| H  | -1.8424116 | -1.5577719 | 1.9237491  |
| H  | -1.8524914 | 0.1274550  | 2.4738056  |
| H  | -3.3111529 | -0.5789589 | 1.7546905  |
| H  | 1.9072556  | 2.0914644  | -1.3389056 |
| H  | 1.8968734  | 2.4490772  | 0.3974339  |
| H  | 3.3543099  | 1.7830996  | -0.3617507 |
| H  | 1.8433975  | -1.5681208 | 1.9145539  |



H 3.3118487 -0.5880848 1.7497403  
 H 1.8534015 0.1143227 2.4730790  
 H 3.3341217 -1.2301716 -1.3600278  
 H 1.8646882 -2.1988160 -1.1450217  
 H 1.8885303 -0.8743604 -2.3231857

SiMe<sub>3</sub>Cl : chlorosilane

14

Energy = -869.6776581895

Si 0.0000132 -0.0000201 -0.3454961  
 C -0.0000569 1.7902628 -0.8874499  
 C 1.5504196 -0.8951041 -0.8874130  
 C -1.5503545 -0.8951853 -0.8874092  
 H -0.0008051 1.8501256 -1.9832543  
 H -0.8876821 2.3146844 -0.5171584  
 H 0.8882092 2.3144469 -0.5183675  
 H 1.6028186 -0.9242624 -1.9832045  
 H 2.4483095 -0.3887080 -0.5168554  
 H 1.5600019 -1.9264953 -0.5184664  
 H -1.5605507 -1.9261216 -0.5172199  
 H -2.4483300 -0.3880333 -0.5180971  
 H -1.6020030 -0.9256740 -1.9831991  
 Cl 0.0000104 0.0000855 1.7637789

SiMe<sub>3</sub>H : silane

14

Energy = -409.9782748062

Si 2.5155841 -2.0176785 -0.4461132  
 C 2.0518300 -3.8428785 -0.4674555  
 C 4.0774087 -1.7221617 -1.4561692  
 C 2.7512352 -1.4178312 1.3234897  
 H 2.8478845 -4.4510034 -0.0200322  
 H 1.1312779 -4.0244089 0.0998341  
 H 1.8923478 -4.1992455 -1.4920524  
 H 4.9233675 -2.2793591 -1.0347858  
 H 3.9450321 -2.0471589 -2.4949495  
 H 4.3470349 -0.6594321 -1.4671107  
 H 3.0003937 -0.3503856 1.3503049  
 H 1.8412670 -1.5665861 1.9168351  
 H 3.5655835 -1.9656009 1.8138614  
 H 1.3998424 -1.2398441 -1.0635129

SiI : iodosilane

14

Energy = -707.0311227089

Si 0.0000112 -0.0000277 -1.2676981  
 C -0.0000359 1.7924136 -1.8095310  
 C 1.5522687 -0.8961914 -1.8095264  
 C -1.5522192 -0.8962410 -1.8095356  
 H -0.0004442 1.8427542 -2.9063970  
 H -0.8878276 2.3173857 -1.4422690

H 0.8881179 2.3172291 -1.4429267  
 H 1.5961777 -0.9210077 -2.9063758  
 H 2.4507175 -0.3898346 -1.4421249  
 H 1.5625126 -1.9277614 -1.4429503  
 H -1.5627902 -1.9276021 -1.4423854  
 H -2.4506884 -0.3894981 -1.4427162  
 H -1.5957799 -0.9216879 -2.9063835  
 I -0.0000204 0.0000673 1.2403782

**TS1** : TS for H<sub>2</sub>-cleavage with Lut.B(C<sub>6</sub>F<sub>5</sub>)<sub>3</sub>  
 53

Energy = -2537.822947856

B -0.0332434 0.3977256 -0.0392261  
 C -0.2806106 0.8396335 1.4862393  
 C 0.2484169 1.6472981 -1.0161299  
 C -0.8645133 -0.8495711 -0.6155007  
 C -1.5111964 0.7533505 2.1384871  
 C 0.7497422 1.4119857 2.2332076  
 C 1.3790649 1.8116379 -1.8140146  
 C -0.6879245 2.6798562 -1.0874027  
 C -1.0713490 -1.9992318 0.1570678  
 C -1.4175494 -0.8962323 -1.9002364  
 C -1.7059716 1.1827147 3.4481779  
 F -2.5884461 0.2462505 1.4990087  
 C 0.6066188 1.8389528 3.5478579  
 F 1.9766102 1.5578711 1.6647728  
 C 1.5864057 2.9225185 -2.6261549  
 F 2.3474085 0.8590027 -1.8210177  
 C -0.5257988 3.8044973 -1.8882208  
 F -1.8351345 2.5881539 -0.3734928  
 C -1.7610368 -3.1179205 -0.2925717  
 F -0.5865416 -2.0582261 1.4171215  
 C -2.1295133 -1.9921850 -2.3836535  
 F -1.2849495 0.1403011 -2.7549429  
 C -0.6386490 1.7238882 4.1597154  
 F -2.9124679 1.0806566 4.0323804  
 F 1.6440151 2.3615025 4.2249584  
 C 0.6245966 3.9272299 -2.6633022  
 F 2.7000640 3.0329739 -3.3714174  
 F -1.4646287 4.7657867 -1.9268089  
 C -2.2991794 -3.1124957 -1.5768525  
 F -1.9158488 -4.1956676 0.4944296  
 F -2.6440246 -1.9801692 -3.6249665  
 F -0.8095821 2.1369931 5.4235568  
 F 0.8025190 5.0045191 -3.4418422  
 F -2.9740531 -4.1762527 -2.0304890  
 H 1.4548327 0.1248848 0.0952623  
 C 2.7017022 -2.8348648 1.2751055  
 C 3.3037843 -4.0838261 1.4512022  
 C 3.3907271 -4.9522340 0.3666974  
 C 2.8824846 -4.5491153 -0.8647701

|   |           |            |            |
|---|-----------|------------|------------|
| C | 2.2881592 | -3.2885439 | -0.9742579 |
| N | 2.1990244 | -2.4576349 | 0.0825962  |
| H | 3.8547400 | -5.9280317 | 0.4783314  |
| H | 3.6989871 | -4.3613934 | 2.4233480  |
| H | 2.9425356 | -5.1964812 | -1.7340355 |
| C | 2.5985152 | -1.8474644 | 2.4066816  |
| H | 1.5498048 | -1.6406617 | 2.6426935  |
| H | 3.0876497 | -2.2297584 | 3.3053256  |
| H | 3.0710744 | -0.8995296 | 2.1294247  |
| C | 1.7174418 | -2.8010130 | -2.2780447 |
| H | 2.0889276 | -1.7983935 | -2.5098552 |
| H | 1.9757914 | -3.4751093 | -3.0976803 |
| H | 0.6256616 | -2.7400973 | -2.2160020 |
| H | 1.2331036 | -0.6305934 | 0.0215199  |

**TS2** : TS for hydride transfer from **A** to CO<sub>2</sub>  
56

Energy = -2726.548000605

|   |            |            |            |
|---|------------|------------|------------|
| B | -0.7059682 | 0.1847510  | 0.2489573  |
| C | -1.2300275 | -0.1544528 | 1.7386240  |
| C | -1.8402461 | 0.3874654  | -0.8720625 |
| C | 0.6446069  | -0.6171050 | -0.1288862 |
| C | -1.2385198 | -1.4617074 | 2.2297776  |
| C | -1.7137448 | 0.8055886  | 2.6260042  |
| C | -1.5544316 | 1.0467829  | -2.0705367 |
| C | -3.1759464 | -0.0020141 | -0.7351066 |
| C | 1.7076322  | -0.6450528 | 0.7819901  |
| C | 0.8611093  | -1.3646504 | -1.2894849 |
| C | -1.6729030 | -1.8033493 | 3.5058852  |
| F | -0.8358467 | -2.4880265 | 1.4363322  |
| C | -2.1537861 | 0.5121346  | 3.9138508  |
| F | -1.7679218 | 2.1057769  | 2.2513035  |
| C | -2.4909776 | 1.3235763  | -3.0561737 |
| F | -0.2807893 | 1.4480720  | -2.3218503 |
| C | -4.1507616 | 0.2466147  | -1.6995698 |
| F | -3.5956927 | -0.6783745 | 0.3606196  |
| C | 2.8867379  | -1.3529624 | 0.5808542  |
| F | 1.6177408  | 0.0432637  | 1.9472318  |
| C | 2.0368975  | -2.0695208 | -1.5427615 |
| F | -0.0969436 | -1.4651158 | -2.2385086 |
| C | -2.1323446 | -0.8049874 | 4.3591897  |
| F | -1.6625253 | -3.0860459 | 3.9210922  |
| F | -2.6000585 | 1.4876479  | 4.7301323  |
| C | -3.8092315 | 0.9194731  | -2.8667219 |
| F | -2.1413389 | 1.9680334  | -4.1866676 |
| F | -5.4209217 | -0.1622901 | -1.5136722 |
| C | 3.0601017  | -2.0651547 | -0.6013411 |
| F | 3.8676784  | -1.3431003 | 1.5074779  |
| F | 2.1942418  | -2.7558412 | -2.6916800 |
| F | -2.5553020 | -1.1117341 | 5.5978257  |
| F | -4.7371476 | 1.1688175  | -3.8049000 |

|   |            |            |            |
|---|------------|------------|------------|
| F | 4.2029443  | -2.7329870 | -0.8325754 |
| H | -0.2176246 | 1.4703627  | 0.3424854  |
| C | 4.7488883  | 1.6410660  | 0.5775188  |
| C | 5.9773973  | 1.0422864  | 0.3373240  |
| C | 6.2427575  | 0.4868327  | -0.9135489 |
| C | 5.2874869  | 0.5475136  | -1.9240700 |
| C | 4.0647385  | 1.1598163  | -1.6766156 |
| N | 3.8472343  | 1.6676526  | -0.4388384 |
| H | 7.1986873  | 0.0087351  | -1.1005707 |
| H | 6.7115146  | 1.0075453  | 1.1331687  |
| H | 5.4785373  | 0.1269585  | -2.9042255 |
| C | 4.3403908  | 2.2377207  | 1.8856332  |
| H | 5.2083283  | 2.3324883  | 2.5387280  |
| H | 3.8839476  | 3.2206841  | 1.7401197  |
| H | 3.5988211  | 1.5981566  | 2.3761024  |
| C | 2.9858972  | 1.3181044  | -2.6985504 |
| H | 3.2574951  | 2.1191516  | -3.3954167 |
| H | 2.8728459  | 0.3995758  | -3.2786473 |
| H | 2.0331058  | 1.5713098  | -2.2356517 |
| H | 2.9113769  | 2.0837880  | -0.2384588 |
| O | 1.4471640  | 2.7418778  | 0.2533669  |
| C | 0.2323443  | 2.7574105  | 0.1211068  |
| O | -0.7050666 | 3.4637174  | -0.1214683 |

**TS3<sup>-</sup>** : silylium transfer from SiMe<sub>3</sub>I to anion **B<sup>-</sup>**  
52

Energy = -3106.008417658

|    |            |            |            |
|----|------------|------------|------------|
| O  | 0.4006200  | 0.1356640  | -1.1696549 |
| C  | -0.8600676 | 0.1749337  | -0.8602512 |
| H  | -1.0959366 | 0.1402798  | 0.2144244  |
| O  | -1.7566897 | 0.2417380  | -1.7043038 |
| Si | -4.1463483 | 0.1355169  | -0.8856237 |
| C  | -3.6072514 | -1.4980924 | -0.1218738 |
| C  | -3.7008452 | 1.7516968  | -0.0331128 |
| C  | -4.4809962 | 0.1663053  | -2.7291880 |
| H  | -2.6316620 | -1.8353977 | -0.4781308 |
| H  | -3.5751740 | -1.4102469 | 0.9701433  |
| H  | -4.3495073 | -2.2652687 | -0.3647743 |
| H  | -2.7236105 | 2.1346406  | -0.3337966 |
| H  | -4.4607240 | 2.5018571  | -0.2758258 |
| H  | -3.7117236 | 1.6158698  | 1.0542113  |
| H  | -3.5469873 | 0.1805568  | -3.2959018 |
| H  | -5.0629629 | -0.7164781 | -3.0148132 |
| H  | -5.0717672 | 1.0523170  | -2.9854754 |
| I  | -6.6449791 | 0.0473315  | -0.0563042 |
| B  | 1.5506922  | 0.0203472  | -0.1499625 |
| C  | 2.1655681  | 1.5337531  | 0.0649529  |
| C  | 0.9923733  | -0.6550340 | 1.2438530  |
| C  | 2.6296742  | -0.9361837 | -0.9446421 |
| C  | 3.5303754  | 1.8153532  | 0.1521058  |
| C  | 1.3478555  | 2.6608278  | 0.1658319  |

|   |            |            |            |
|---|------------|------------|------------|
| C | 0.2527286  | -1.8419218 | 1.1963857  |
| C | 1.1813840  | -0.1547968 | 2.5323888  |
| C | 2.9870143  | -0.6128595 | -2.2576545 |
| C | 3.2556733  | -2.0772077 | -0.4451761 |
| C | 4.0529914  | 3.0998488  | 0.2806677  |
| C | 1.8205622  | 3.9632973  | 0.2917428  |
| C | -0.2876304 | -2.4762969 | 2.3072128  |
| C | 0.6673530  | -0.7600160 | 3.6796267  |
| C | 3.8590706  | -1.3692118 | -3.0343064 |
| C | 4.1342262  | -2.8657917 | -1.1857247 |
| C | 3.1911812  | 4.1876696  | 0.3443491  |
| C | -0.0761322 | -1.9275378 | 3.5688014  |
| C | 4.4366679  | -2.5127717 | -2.4943939 |
| F | 4.4490888  | 0.8145379  | 0.1456873  |
| F | -0.0064186 | 2.5278097  | 0.1870930  |
| F | 0.0308805  | -2.4435129 | -0.0017661 |
| F | 1.9018435  | 0.9736403  | 2.7510986  |
| F | 2.5069292  | 0.5144045  | -2.8368511 |
| F | 3.0586230  | -2.4821172 | 0.8371515  |
| F | 5.3865717  | 3.2994268  | 0.3531496  |
| F | 0.9679380  | 5.0057882  | 0.3805712  |
| F | -1.0007666 | -3.6138259 | 2.1819949  |
| F | 0.8861269  | -0.2221396 | 4.8974859  |
| F | 4.1626738  | -1.0004249 | -4.2977342 |
| F | 4.7004383  | -3.9654944 | -0.6424933 |
| F | 3.6750449  | 5.4378129  | 0.4697354  |
| F | -0.5825455 | -2.5216183 | 4.6639501  |
| F | 5.2837969  | -3.2616120 | -3.2265457 |

**TS4** : silylium transfer from SiMe<sub>3</sub>I to **D**  
31

Energy = -1305.732668379

|    |            |            |            |
|----|------------|------------|------------|
| O  | 3.6755789  | -1.2069881 | 0.3281090  |
| Si | 4.6799199  | 0.2022751  | 0.0055598  |
| C  | 2.3711537  | -1.1873706 | 0.2836414  |
| C  | 4.3804280  | 0.7116576  | -1.7633315 |
| C  | 4.2316279  | 1.5138019  | 1.2537637  |
| C  | 6.3841675  | -0.4978338 | 0.2783868  |
| H  | 1.9085238  | -2.1503067 | 0.5274912  |
| O  | 1.7115553  | -0.1830451 | -0.0049262 |
| H  | 5.0846753  | 1.5053502  | -2.0416581 |
| H  | 4.5376290  | -0.1293346 | -2.4481072 |
| H  | 3.3648964  | 1.0927871  | -1.9065371 |
| H  | 4.9402802  | 2.3478606  | 1.1785898  |
| H  | 3.2247380  | 1.9067277  | 1.0848439  |
| H  | 4.2862880  | 1.1212919  | 2.2755195  |
| H  | 6.5029659  | -0.8628582 | 1.3046580  |
| H  | 6.5872546  | -1.3273103 | -0.4080659 |
| H  | 7.1414384  | 0.2762905  | 0.1058919  |
| Si | -0.4603308 | -0.0578033 | -0.0741055 |
| C  | -0.3643657 | -1.3769439 | -1.4192793 |

|   |            |            |            |
|---|------------|------------|------------|
| C | -0.4634723 | -0.5217907 | 1.7540721  |
| C | -0.2268745 | 1.7410175  | -0.5563115 |
| H | 0.5561812  | -1.2837663 | -2.0051857 |
| H | -0.3878660 | -2.3772850 | -0.9697083 |
| H | -1.2194345 | -1.2992813 | -2.0938623 |
| H | 0.5189779  | -0.4191864 | 2.2256116  |
| H | -1.1730588 | 0.1172524  | 2.2867391  |
| H | -0.8059912 | -1.5559460 | 1.8747129  |
| H | -0.6855771 | 1.9214337  | -1.5340451 |
| H | -0.7360941 | 2.3859934  | 0.1669588  |
| H | 0.8297152  | 2.0211077  | -0.6026282 |
| I | -3.1998053 | 0.0828337  | -0.1488637 |

**TS5** : hydride transfer from **A**<sup>-</sup> to **E**<sup>+</sup>

65

Energy = -3218.237915100

|    |            |            |            |
|----|------------|------------|------------|
| O  | 2.3193961  | -1.2232243 | -1.5178069 |
| Si | 2.2442675  | -2.9179341 | -1.9205853 |
| C  | 1.6026990  | -0.2268576 | -1.9583979 |
| C  | 1.0536229  | -3.7504590 | -0.7612903 |
| C  | 1.7405350  | -3.0302929 | -3.7129872 |
| C  | 4.0042811  | -3.4440875 | -1.6180193 |
| H  | 0.8368708  | -0.3973694 | -2.7106468 |
| O  | 2.0885618  | 0.9732022  | -1.9157375 |
| H  | 1.0388293  | -4.8259954 | -0.9767963 |
| H  | 1.3608902  | -3.6234715 | 0.2815229  |
| H  | 0.0352521  | -3.3699573 | -0.8753549 |
| H  | 1.8125398  | -4.0748674 | -4.0391076 |
| H  | 0.7086361  | -2.7057756 | -3.8807246 |
| H  | 2.4016722  | -2.4362228 | -4.3545395 |
| H  | 4.6993927  | -2.9332169 | -2.2928804 |
| H  | 4.3062453  | -3.2302196 | -0.5866134 |
| H  | 4.1063383  | -4.5236298 | -1.7803700 |
| Si | 3.6114964  | 1.6938861  | -1.4614825 |
| C  | 4.1716566  | 2.4231700  | -3.0854107 |
| C  | 3.1750160  | 3.0093921  | -0.2186611 |
| C  | 4.8214508  | 0.4319823  | -0.8175124 |
| H  | 4.3562853  | 1.6420972  | -3.8316948 |
| H  | 3.4223814  | 3.1134939  | -3.4879432 |
| H  | 5.1053316  | 2.9811516  | -2.9447152 |
| H  | 2.7345618  | 2.5870832  | 0.6882073  |
| H  | 4.0843106  | 3.5544355  | 0.0637890  |
| H  | 2.4703143  | 3.7317952  | -0.6421747 |
| H  | 5.7552048  | 0.9531945  | -0.5693477 |
| H  | 4.4590342  | -0.0678565 | 0.0841294  |
| H  | 5.0535048  | -0.3274960 | -1.5703930 |
| B  | -0.4771037 | 0.0167940  | 0.0613380  |
| C  | 0.0925492  | -0.9531122 | 1.2258180  |
| C  | -0.3786147 | 1.6159996  | 0.3136170  |
| C  | -1.9360160 | -0.3655026 | -0.5398095 |
| C  | -0.5915106 | -2.0112730 | 1.8282568  |

|   |            |            |            |
|---|------------|------------|------------|
| C | 1.4166881  | -0.8142353 | 1.6487110  |
| C | -0.5113918 | 2.4782158  | -0.7774852 |
| C | -0.2076875 | 2.2534210  | 1.5426367  |
| C | -3.1057865 | 0.0571558  | 0.0952250  |
| C | -2.1439350 | -1.0895043 | -1.7084273 |
| C | -0.0159664 | -2.8631908 | 2.7702432  |
| F | -1.8828197 | -2.2763226 | 1.5149951  |
| C | 2.0388051  | -1.6415874 | 2.5743025  |
| F | 2.1688810  | 0.1984241  | 1.1448645  |
| C | -0.4630661 | 3.8643814  | -0.6819636 |
| F | -0.7060919 | 1.9625711  | -2.0190776 |
| C | -0.1535219 | 3.6376083  | 1.6879704  |
| F | -0.1056449 | 1.5312751  | 2.6850536  |
| C | -4.3841728 | -0.2055707 | -0.3855078 |
| F | -3.0236741 | 0.7385775  | 1.2653115  |
| C | -3.3999283 | -1.3799675 | -2.2336641 |
| F | -1.0779929 | -1.5691820 | -2.4156033 |
| C | 1.3108242  | -2.6824608 | 3.1447036  |
| F | -0.7290967 | -3.8687959 | 3.3138800  |
| F | 3.3268747  | -1.4500715 | 2.9248269  |
| C | -0.2794230 | 4.4508078  | 0.5665249  |
| F | -0.5807393 | 4.6419579  | -1.7778122 |
| F | 0.0163386  | 4.1986456  | 2.9021189  |
| C | -4.5334571 | -0.9303477 | -1.5653079 |
| F | -5.4768906 | 0.2229687  | 0.2770743  |
| F | -3.5280486 | -2.0856500 | -3.3758806 |
| F | 1.8832513  | -3.5004042 | 4.0438263  |
| F | -0.2189084 | 5.7885634  | 0.6864407  |
| F | -5.7592233 | -1.1957739 | -2.0498568 |
| H | 0.3673729  | -0.1602364 | -0.8819147 |

**TS6** : silylium transfer from SiMe<sub>3</sub>I to E  
45

Energy = -1715.739072524

|    |           |            |            |
|----|-----------|------------|------------|
| O  | 0.9435513 | -0.2780725 | -0.3171676 |
| C  | 1.8657774 | -0.2618767 | 0.8042982  |
| H  | 1.6217179 | -1.1217158 | 1.4307855  |
| O  | 3.1545885 | -0.3642168 | 0.2927957  |
| Si | 4.5660671 | 0.0133743  | 1.1510223  |
| C  | 4.5313945 | 1.8280879  | 1.6155921  |
| H  | 3.6602034 | 2.0716096  | 2.2354733  |
| H  | 5.4255862 | 2.0873414  | 2.1956718  |
| H  | 4.5074990 | 2.4704455  | 0.7286187  |
| C  | 4.6333922 | -1.0598449 | 2.6845017  |
| H  | 5.5672570 | -0.8865292 | 3.2331652  |
| H  | 3.8056822 | -0.8389317 | 3.3695659  |
| H  | 4.5872079 | -2.1244194 | 2.4270833  |
| C  | 5.9319872 | -0.3858187 | -0.0567629 |
| H  | 5.9136695 | -1.4449792 | -0.3371971 |
| H  | 5.8435962 | 0.2116593  | -0.9712423 |
| H  | 6.9110061 | -0.1722524 | 0.3886728  |

|    |            |            |            |
|----|------------|------------|------------|
| H  | 1.7141540  | 0.6788800  | 1.3505526  |
| Si | 1.6251838  | 0.0808360  | -1.8948888 |
| C  | 0.1847210  | 0.3509955  | -3.0601710 |
| C  | 2.5922610  | -1.3939688 | -2.5143281 |
| C  | 2.6037531  | 1.6802208  | -1.8055318 |
| H  | 0.6395852  | 0.6556884  | -4.0131781 |
| H  | -0.4014714 | -0.5497766 | -3.2538793 |
| H  | -0.4916316 | 1.1529735  | -2.7551431 |
| H  | 3.5304080  | -1.5342309 | -1.9736396 |
| H  | 1.9982062  | -2.3108103 | -2.4193546 |
| H  | 2.8167313  | -1.2569469 | -3.5799270 |
| H  | 3.6749811  | 1.4980171  | -1.6869951 |
| H  | 2.4523307  | 2.2590602  | -2.7243096 |
| H  | 2.2744873  | 2.3049962  | -0.9673114 |
| C  | -0.8287703 | -0.7754124 | 1.9300195  |
| C  | -1.2077703 | 1.5700967  | -0.2148930 |
| C  | -1.3945332 | -1.7002584 | -1.0576842 |
| H  | -0.3540202 | -1.7606949 | 1.9955352  |
| H  | -0.2136612 | -0.0491185 | 2.4715726  |
| H  | -1.7960588 | -0.8350152 | 2.4319400  |
| H  | -1.8714406 | 1.7804913  | -1.0574756 |
| H  | -1.6422343 | 2.0576496  | 0.6638290  |
| H  | -0.2252864 | 2.0117505  | -0.4119983 |
| H  | -1.9175810 | -2.4876327 | -0.5051035 |
| H  | -2.0383562 | -1.4087901 | -1.8908095 |
| H  | -0.4563996 | -2.1103606 | -1.4441886 |
| Si | -1.1270123 | -0.2768523 | 0.1394870  |
| I  | -3.9833742 | -0.2028419 | 0.5121304  |

**TS7** : hydride transfer from A<sup>-</sup> to F<sup>+</sup>  
79

Energy = -3628.251465697

|    |           |            |            |
|----|-----------|------------|------------|
| O  | 3.6519642 | -0.6190410 | 0.0212912  |
| C  | 2.0809969 | 0.3317471  | 0.3175016  |
| H  | 1.8401693 | -0.1576788 | 1.2542954  |
| O  | 2.3862487 | 1.5925438  | 0.3076797  |
| Si | 2.5553134 | 2.6869636  | 1.6568814  |
| C  | 2.4568310 | 4.3376270  | 0.8070512  |
| H  | 3.2382427 | 4.4337092  | 0.0447894  |
| H  | 1.4865281 | 4.4755022  | 0.3192352  |
| H  | 2.5922385 | 5.1486533  | 1.5319903  |
| C  | 1.1286908 | 2.3395163  | 2.8023790  |
| H  | 1.1378778 | 3.0634676  | 3.6262237  |
| H  | 0.1732168 | 2.4331813  | 2.2754575  |
| H  | 1.1723073 | 1.3380650  | 3.2430877  |
| C  | 4.2246105 | 2.3732363  | 2.4312034  |
| H  | 4.3862498 | 3.0880026  | 3.2473124  |
| H  | 5.0349154 | 2.5041611  | 1.7068481  |
| H  | 4.3023238 | 1.3681676  | 2.8576220  |
| H  | 1.6062538 | -0.0383404 | -0.5816536 |
| Si | 4.3984886 | -0.1990505 | -1.4940892 |

C 5.2550835 -1.7192866 -2.1613863  
 C 5.5954250 1.1924056 -1.1573834  
 C 3.0378933 0.3190831 -2.6630759  
 H 5.7494884 -1.4373457 -3.1000498  
 H 6.0249587 -2.1231958 -1.4971405  
 H 4.5386118 -2.5149644 -2.3904853  
 H 6.3346451 0.9212222 -0.3963338  
 H 5.0695820 2.0928871 -0.8234319  
 H 6.1380514 1.4448207 -2.0764556  
 H 2.5176450 1.2277933 -2.3465158  
 H 3.4962211 0.5249588 -3.6386561  
 H 2.2973230 -0.4745711 -2.8141662  
 C 3.1252819 -1.5701416 2.7284074  
 C 3.8491700 -3.5074508 0.4831166  
 C 5.9588311 -1.4759643 1.5460243  
 H 3.1444279 -0.5488920 3.1223012  
 H 2.0814890 -1.8758343 2.5992535  
 H 3.5571246 -2.2163605 3.5036804  
 H 4.5333829 -3.7646095 -0.3299818  
 H 3.9867864 -4.2479471 1.2813464  
 H 2.8219175 -3.6002310 0.1156541  
 H 6.3140885 -2.2054467 2.2846137  
 H 6.5949480 -1.5712735 0.6602069  
 H 6.1062418 -0.4755697 1.9679488  
 Si 4.1546432 -1.8071490 1.1850989  
 B -1.2244451 0.0749581 0.2430309  
 C -1.7367283 1.6095463 0.0230179  
 C -0.9552775 -0.7791294 -1.1323261  
 C -2.1240575 -0.8527111 1.2363147  
 C -2.7772423 2.2416340 0.7044435  
 C -1.0110378 2.4611982 -0.8146097  
 C -0.0946020 -1.8777910 -1.0859272  
 C -1.5019875 -0.5365337 -2.3924572  
 C -3.3760944 -1.3433226 0.8682356  
 C -1.6715408 -1.2852373 2.4801916  
 C -3.0835671 3.5965229 0.5706975  
 F -3.5639784 1.5523931 1.5710274  
 C -1.2743355 3.8149008 -0.9816685  
 F 0.0373430 1.9654848 -1.5285017  
 C 0.2454441 -2.6580611 -2.1861525  
 F 0.4802869 -2.2336614 0.1012828  
 C -1.1972024 -1.2895516 -3.5251389  
 F -2.3799212 0.4789529 -2.5767082  
 C -4.1397552 -2.1929549 1.6602688  
 F -3.9117226 -0.9711659 -0.3231646  
 C -2.3956930 -2.1390099 3.3098760  
 F -0.4602224 -0.8823957 2.9554114  
 C -2.3270946 4.3933606 -0.2790769  
 F -4.1060492 4.1434333 1.2622829  
 F -0.5202467 4.5755070 -1.8064587  
 C -0.3112997 -2.3573226 -3.4250993

F 1.1071880 -3.6936480 -2.0696677  
 F -1.7518371 -0.9974392 -4.7195765  
 C -3.6420173 -2.5958573 2.8966461  
 F -5.3522132 -2.6278371 1.2546785  
 F -1.9040297 -2.5295734 4.5066667  
 F -2.6033785 5.7042643 -0.4189393  
 F -0.0003360 -3.0932294 -4.5087744  
 F -4.3609666 -3.4200349 3.6836101  
 H -0.1419769 0.2064010 0.7784779

**TS8** : silylium transfer from SiMe<sub>3</sub>I to F  
32

Energy = -1231.643751783

O 2.1490428 -0.1212971 0.7420031  
 C 2.7233864 0.0481158 2.0800539  
 H 2.3493419 -0.7492335 2.7181950  
 H 3.8104807 -0.0221796 2.0109009  
 H 2.4405698 1.0273767 2.4693810  
 Si 3.3310647 0.0066844 -0.5380486  
 C 2.4624482 0.0572878 -2.1862303  
 C 4.4191815 -1.5039822 -0.3853736  
 C 4.2761100 1.5971960 -0.2601144  
 H 3.2254587 0.3224683 -2.9303679  
 H 2.0372257 -0.9058526 -2.4773787  
 H 1.6793003 0.8183672 -2.2381804  
 H 4.9533440 -1.5460931 0.5699766  
 H 3.8287284 -2.4215447 -0.4880864  
 H 5.1707598 -1.4972388 -1.1843899  
 H 4.8328712 1.6121675 0.6822322  
 H 5.0023747 1.7208373 -1.0732417  
 H 3.6090164 2.4663490 -0.2784316  
 C -0.2223303 -0.3662427 2.3246953  
 C 0.1989382 1.7300992 -0.0937057  
 C 0.1374116 -1.5803481 -0.5859691  
 H 0.2543085 -1.2934712 2.6621598  
 H 0.1203393 0.4557171 2.9619114  
 H -1.3000494 -0.4710274 2.4590503  
 H -0.1508489 1.8065618 -1.1268259  
 H -0.4823360 2.3287130 0.5184372  
 H 1.2039214 2.1606333 -0.0211757  
 H -0.6159234 -2.2698137 -0.1927812  
 H -0.1473740 -1.3425251 -1.6136513  
 H 1.1073338 -2.0897229 -0.5846402  
 Si 0.1283625 -0.0522584 0.5065396  
 I -2.7773043 0.1137370 -0.0920847

**TS9<sup>+</sup>** : iodide transfer from LutHI to G<sup>+</sup>  
50

Energy = -1559.220457504

O 2.9947838 -0.1472545 -0.1146678  
 Si 4.0628017 -0.4404914 -1.4555878

|    |            |            |            |
|----|------------|------------|------------|
| Si | 3.0247254  | -0.6920401 | 1.5301372  |
| C  | 3.9491417  | -2.2643100 | -1.8396201 |
| C  | 5.7756857  | 0.1102408  | -0.9579660 |
| C  | 3.4310331  | 0.5994515  | -2.8711116 |
| C  | 1.6823077  | -1.9876124 | 1.6749223  |
| C  | 2.6947529  | 0.8129401  | 2.5830884  |
| C  | 4.7013141  | -1.4194806 | 1.9010329  |
| H  | 4.5910077  | -2.5070547 | -2.6950260 |
| H  | 4.2720553  | -2.8855646 | -0.9971070 |
| H  | 2.9241595  | -2.5507446 | -2.1028635 |
| H  | 6.2939903  | -0.6162589 | -0.3264730 |
| H  | 5.7464705  | 1.0715099  | -0.4327606 |
| H  | 6.3748204  | 0.2484894  | -1.8667784 |
| H  | 3.4442991  | 1.6694194  | -2.6352048 |
| H  | 4.1020656  | 0.4458905  | -3.7256535 |
| H  | 2.4221836  | 0.3268549  | -3.1976957 |
| H  | 1.8415121  | -2.8040776 | 0.9616219  |
| H  | 1.6916978  | -2.4183360 | 2.6829403  |
| H  | 0.6816019  | -1.5742700 | 1.5069189  |
| H  | 3.4028917  | 1.6142533  | 2.3451587  |
| H  | 1.6810489  | 1.2120615  | 2.4689921  |
| H  | 2.8260989  | 0.5527879  | 3.6402066  |
| H  | 4.6526013  | -1.8683621 | 2.9016250  |
| H  | 4.9919504  | -2.2111823 | 1.2033748  |
| H  | 5.4879094  | -0.6594164 | 1.9176436  |
| C  | 1.3352112  | 0.4771287  | -0.5560634 |
| H  | 0.9307825  | 0.5327415  | 0.4409418  |
| H  | 1.0300713  | -0.3448161 | -1.1819571 |
| H  | 1.6489103  | 1.3980995  | -1.0171823 |
| I  | -1.2186483 | 1.4285730  | -1.2133027 |
| C  | -4.6279281 | -0.0863881 | 0.8922308  |
| C  | -5.6187625 | -0.9114395 | 1.4083827  |
| C  | -5.5059261 | -2.2942149 | 1.2720822  |
| C  | -4.4022403 | -2.8503609 | 0.6274841  |
| C  | -3.4123605 | -2.0173083 | 0.1229847  |
| N  | -3.5719587 | -0.6790312 | 0.2780874  |
| H  | -6.2824965 | -2.9409109 | 1.6674741  |
| H  | -6.4722471 | -0.4641488 | 1.9039533  |
| H  | -4.3015167 | -3.9232265 | 0.5104396  |
| C  | -4.6449869 | 1.4067136  | 0.9586676  |
| H  | -5.5515892 | 1.7478979  | 1.4590940  |
| H  | -3.7722551 | 1.7785990  | 1.5057607  |
| H  | -4.6062639 | 1.8353894  | -0.0481124 |
| C  | -2.1705350 | -2.4944540 | -0.5614991 |
| H  | -1.9098636 | -1.8389705 | -1.3971635 |
| H  | -1.3298548 | -2.4896417 | 0.1428393  |
| H  | -2.3080335 | -3.5145011 | -0.9213271 |
| H  | -2.8392698 | -0.0544850 | -0.1319522 |

**TS10** : TS for hydride transfer, to O(SiMe<sub>3</sub>)<sub>2</sub>  
66

|                          |            |            |            |
|--------------------------|------------|------------|------------|
| Energy = -3144.133521144 |            |            |            |
| O                        | 3.7066274  | 0.0347915  | 1.0942857  |
| C                        | 1.9543350  | 0.2416419  | 0.6879423  |
| H                        | 1.7185449  | -0.8074861 | 0.6699566  |
| H                        | 1.6779634  | 0.8086276  | 1.5626416  |
| H                        | 2.0878335  | 0.7562109  | -0.2501275 |
| Si                       | 4.6420959  | 1.4916416  | 1.2849579  |
| C                        | 6.1394035  | 1.3554745  | 0.1768498  |
| C                        | 5.0626541  | 1.6347725  | 3.0961410  |
| C                        | 3.5686386  | 2.9131770  | 0.7271270  |
| H                        | 6.7245712  | 2.2795897  | 0.2656439  |
| H                        | 6.8013829  | 0.5231567  | 0.4328291  |
| H                        | 5.8435994  | 1.2519195  | -0.8730838 |
| H                        | 5.7394628  | 0.8435507  | 3.4320623  |
| H                        | 4.1571233  | 1.5966528  | 3.7126770  |
| H                        | 5.5533585  | 2.5978102  | 3.2832992  |
| H                        | 2.6616305  | 3.0415622  | 1.3254058  |
| H                        | 4.1608056  | 3.8310848  | 0.8338079  |
| H                        | 3.2775430  | 2.8381034  | -0.3260298 |
| C                        | 2.8672992  | -2.6997684 | 1.6556942  |
| C                        | 4.6378740  | -1.9642938 | -0.7778420 |
| C                        | 5.7351214  | -1.7802756 | 2.1369069  |
| H                        | 2.4244563  | -2.2996729 | 2.5744907  |
| H                        | 2.0683423  | -2.8712681 | 0.9265440  |
| H                        | 3.2944788  | -3.6811388 | 1.8976956  |
| H                        | 5.4381898  | -1.3198003 | -1.1558001 |
| H                        | 4.9609310  | -3.0057613 | -0.8958184 |
| H                        | 3.7519512  | -1.8193972 | -1.4065511 |
| H                        | 6.0885774  | -2.8175622 | 2.0744849  |
| H                        | 6.5740640  | -1.1332926 | 1.8661033  |
| H                        | 5.4654875  | -1.5857722 | 3.1803816  |
| Si                       | 4.2525324  | -1.6187355 | 1.0133304  |
| B                        | -0.8730028 | 0.1842908  | -0.1440019 |
| C                        | -1.7055361 | 1.4374191  | 0.4624100  |
| C                        | -0.6601474 | 0.1898553  | -1.7578053 |
| C                        | -1.3025053 | -1.2613928 | 0.4636380  |
| C                        | -3.0088215 | 1.3755139  | 0.9541164  |
| C                        | -1.1099639 | 2.6956932  | 0.5540541  |
| C                        | 0.2828594  | -0.6605845 | -2.3387044 |
| C                        | -1.3257697 | 1.0110954  | -2.6690955 |
| C                        | -2.0318186 | -2.2321057 | -0.2235153 |
| C                        | -0.9236239 | -1.6299365 | 1.7545432  |
| C                        | -3.6745087 | 2.4676019  | 1.5070124  |
| F                        | -3.7126179 | 0.2171118  | 0.8910809  |
| C                        | -1.7304317 | 3.8144623  | 1.0971481  |
| F                        | 0.1563772  | 2.8744184  | 0.0843294  |
| C                        | 0.5738343  | -0.7027322 | -3.6965792 |
| F                        | 0.9812016  | -1.5299170 | -1.5501377 |
| C                        | -1.0709719 | 1.0073071  | -4.0399164 |
| F                        | -2.2935174 | 1.8653692  | -2.2539910 |
| C                        | -2.3416411 | -3.4820767 | 0.3062802  |

|   |            |            |            |   |            |            |            |
|---|------------|------------|------------|---|------------|------------|------------|
| F | -2.4980691 | -1.9801564 | -1.4721326 | C | -1.9192425 | -3.8056481 | 1.5918520  |
| C | -1.2029599 | -2.8667075 | 2.3267366  | F | -3.0489503 | -4.3810401 | -0.4077216 |
| F | -0.2357599 | -0.7490067 | 2.5354161  | F | -0.7892666 | -3.1649518 | 3.5762872  |
| C | -3.0299157 | 3.6976740  | 1.5816805  | F | -3.6555019 | 4.7636141  | 2.1132162  |
| F | -4.9372791 | 2.3482224  | 1.9654857  | F | 0.1495163  | 0.1313953  | -5.8792634 |
| F | -1.0945832 | 5.0031367  | 1.1599564  | F | -2.2052741 | -5.0091085 | 2.1205917  |
| C | -0.1117069 | 0.1462928  | -4.5602040 | H | 0.2832033  | 0.3732110  | 0.3039577  |
| F | 1.5053287  | -1.5490230 | -4.1833747 |   |            |            |            |
| F | -1.7473719 | 1.8280204  | -4.8685336 |   |            |            |            |

### Computational References

- 1 *TURBOMOLE V7.4*, 2019, a development of University of Karlsruhe and Forschungszentrum Karlsruhe GmbH, 1989-2007, TURBOMOLE GmbH, since 2007; available from <http://www.turbomole.com>.
- 2 J. Tao, J. P. Perdew, V. N. Staroverov and G. E. Scuseria, *Phys. Rev. Lett.*, 2003, **91**, 146401.
- 3 S. Grimme, J. Antony, S. Ehrlich and H. Krieg, *J. Chem. Phys.*, 2010, **132**, 154104-154119.
- 4 S. Grimme, S. Ehrlich and L. Goerigk, *J. Comput. Chem.*, 2011, **32**, 1456-1465.
- 5 F. Weigend, M. Häser, H. Patzelt and R. Ahlrichs, *Chem. Phys. Lett.*, 1998, **294**, 143-152.
- 6 F. Weigend and R. Ahlrichs, *Phys. Chem. Chem. Phys.*, 2005, **7**, 3297-3305.
- 7 A. Klamt and G. Schüürmann, *J. Chem. Soc., Perkin Trans. 2*, 1993, 799-805.
- 8 K. Eichkorn, F. Weigend, O. Treutler and R. Ahlrichs, *Theor. Chem. Acc.*, 1997, **97**, 119-124.
- 9 F. Weigend, *Phys. Chem. Chem. Phys.*, 2006, **8**, 1057-1065.
- 10 P. Deglmann, K. May, F. Furche and R. Ahlrichs, *Chem. Phys. Lett.*, 2004, **384**, 103-107.
- 11 S. Grimme, *Chem. - Eur. J.*, 2012, **18**, 9955-9964.
- 12 F. Eckert and A. Klamt, *AIChE J.*, 2002, **48**, 369-385.
- 13 F. Eckert and A. Klamt, *COSMOtherm*, Version C3.0, Release 16.01; COSMOlogic GmbH & Co. KG, Leverkusen, Germany 2015.
- 14 Y. Zhao and D. G. Truhlar, *J. Phys. Chem. A*, 2005, **109**, 5656-5667.
- 15 F. Weigend, F. Furche and R. Ahlrichs, *J. Chem. Phys.*, 2003, **119**, 12753-12762.
- 16 L. Goerigk, A. Hansen, C. Bauer, S. Ehrlich, A. Najibi, S. Grimme, *Phys. Chem. Chem. Phys.* **2017**, *19*, 32184-32215.
